# Supplementary material for: Preparation of anthranils via chemoselective oxidative radical cyclization of 3-(2-azidoaryl) substituted propargyl alcohols
Source: Royal Society of Chemistry journal article supplement (doi:10.1039/d0cc07919g), 2021-01-01

## Supporting Information

*for*

### **Preparation of Anthranils via Chemoselective Oxidative Radical Cyclization of 3-(2-Azidoaryl) Substituted Propargyl Alcohols**

Chao Gao<sup>1</sup>, Jian Xu<sup>1</sup>, Shuxian Zhu<sup>1</sup>, Kaixia Jian<sup>1</sup>, Qingqing Xuan<sup>1\*</sup>, Qiuling Song<sup>1,2,3\*</sup>

<sup>1</sup> Institute of Next Generation Matter Transformation, College of Chemical Engineering and College of Material Sciences Engineering at Huaqiao University, 668 Jimei Boulevard, Xiamen, Fujian, China, 361021.

<sup>2</sup> Key Laboratory of Molecule Synthesis and Function Discovery Fujian Province University College of Chemistry at Fuzhou University Fuzhou, Fujian, 350108 (P. R. China)

<sup>3</sup> State Key Laboratory of Organometallic Chemistry and Key Laboratory of Organofluorine Chemistry, Shanghai Institute of Organic Chemistry, Chinese Academy of Sciences, Shanghai 200032, China.

Email: [xuanqingqing@hqu.edu.cn](mailto:xuanqingqing@hqu.edu.cn); [qsong@hqu.edu.cn](mailto:qsong@hqu.edu.cn).

### Table of Contents

|                                                                            |           |
|----------------------------------------------------------------------------|-----------|
| <b>I. General method</b> .....                                             | <b>2</b>  |
| <b>II. General procedure for reaction optimization</b> .....               | <b>2</b>  |
| <b>III. The procedure for the synthesis of 1a</b> .....                    | <b>3</b>  |
| <b>IV. The procedure for the synthesis of 3a, 4a, 5a</b> .....             | <b>4</b>  |
| <b>V. Crystal data of 2o</b> .....                                         | <b>6</b>  |
| <b>VI. Analytic data of products</b> .....                                 | <b>7</b>  |
| <b>VII. <sup>1</sup>H and <sup>13</sup>C NMR spectra of products</b> ..... | <b>15</b> |

## I. General method

All chemicals were purchased from Adamas Reagent, Ltd, Energy chemical company, J&K Scientific Ltd, Alfa Aesa chemical company and so forth. Unless otherwise stated, all experiments were conducted in a Schrek bottle under N<sup>2</sup>. Reactions were monitored by TLC or GC-MS analysis. Flash column chromatography was performed over silica gel (200-300 mesh).

<sup>1</sup>H-NMR and <sup>13</sup>C-NMR spectra were recorded in CDCl<sub>3</sub> on a Bruker Avance 500 spectrometer (500 MHz <sup>1</sup>H, 125 MHz <sup>13</sup>C) at room temperature. Chemical shifts were reported in ppm on the scale relative to CDCl<sub>3</sub> ( $\delta = 7.26$  for <sup>1</sup>H-NMR,  $\delta = 77.00$  for <sup>13</sup>C-NMR) or DMSO-d<sub>6</sub> ( $\delta = 2.50$  for <sup>1</sup>H-NMR,  $\delta = 39.60$  for <sup>13</sup>C-NMR) as an internal reference. High resolution mass spectra were recorded using Q-TOF time-of-flight mass spectrometer. Coupling constants (J) were reported in Hertz (Hz).

## II. General procedure for the synthesis of 2

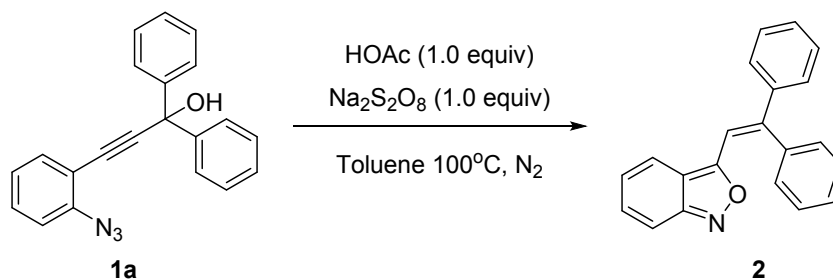

**General optimization procedure:** To a Schenk tube equipped with a stir bar, 162.5 mg of **1a** (0.5 mmol), 119 mg Na<sub>2</sub>S<sub>2</sub>O<sub>8</sub> (0.5 mmol) were added. The Schenk tube was capped with a septum, degassed and backfilled with N<sub>2</sub> for at least three times. Then, the solvent (2.0 mL) and 30  $\mu$ L HOAc (0.5 mmol) were added via syringe. The mixture was stirred at 100 °C for about 12 h. Then, the combined organic layer was evaporated under reduced pressure, and the product was purified by flash chromatography using petroleum ether and ethyl acetate as eluent.

## III. The procedure for the synthesis of 1a

For the synthesis of 1,1-diphenylprop-2-yn-1-ol **B**

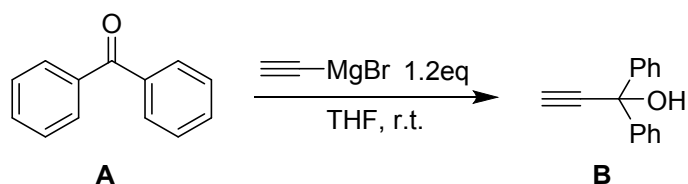

To a stirred solution of benzophenone **A** (5 mmol) in anhydrous THF (20 mL) under  $\text{N}_2$  was added ethynylmagnesium bromide (0.5 mol/L in THF, 1.2 equiv) dropwise slowly at  $0^\circ\text{C}$ . The mixture was allowed to warm and stir for 4 h at room temperature. After completion of the reaction as determined by TLC, the reaction mixture was quenched by aqueous saturated solution of  $\text{NH}_4\text{Cl}$  (20 mL), and extracted with ethyl acetate ( $2 \times 30$  mL). The combined organic layer was washed with brine, dried over anhydrous  $\text{Na}_2\text{SO}_4$ , and concentrated under reduced pressure. The residue was purified by flash column chromatography (silica gel, petroleum ether/ethyl acetate = 50/1) to give 1, 1-diphenylprop-2-yn-1-ol **B** as a white solid.

For the synthesis of 1-azido-2-iodobenzene **D**

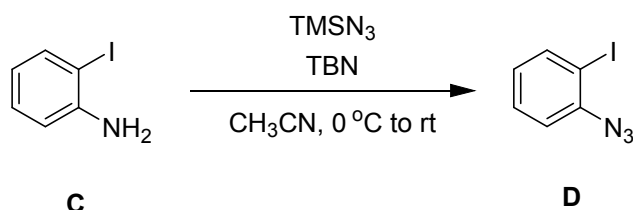

In a round bottomed flask 2.19 g (10 mmol, 1.00 equiv.) **C** was suspended in 15 mL dry acetonitrile under air and cooled to  $0^\circ\text{C}$  with an ice bath. To the stirred suspension, 2.4 mL (4.12 g, 40 mmol, 4.00 equiv.) tert-butylnitrite and 3.95 mL (3.46 g, 30 mmol, 3.00 equiv.) azidotrimethylsilane were slowly added. The reaction mixture was stirred for 2 h and allowed to warm to room temperature. Then, the volatiles were evaporated under reduced pressure. The crude product was purified by flash chromatography on silica gel using cyclohexane/ethyl acetate (20:1, v/v) as eluent. After purification, 0.720 g (4.50 mmol, 49%) 1-azido-2-iodobenzene **D**.

For the synthesis of 3-(2-azidophenyl)-1,1-diphenylprop-2-yn-1-ol **1a**

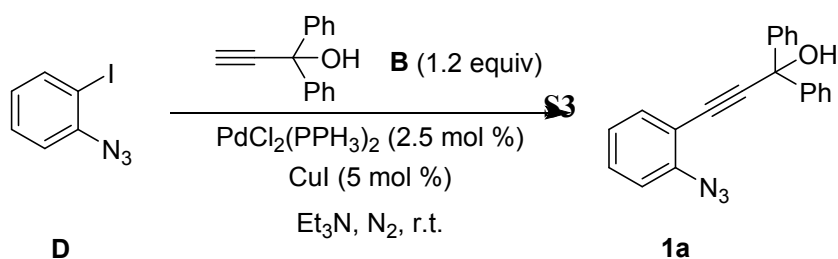

To a solution of 1-azido-2-iodobenzene **D** (1.23 g, 5 mmol) in triethylamine (20 mL) was added PdCl<sub>2</sub>(PPh<sub>3</sub>)<sub>2</sub> (70.2 mg, 0.100 mmol) and CuI (9.5 mg, 0.050 mmol) at room temperature, and the mixture was stirred for 15 min at r.t. under N<sub>2</sub> before addition of 1,1-diphenylprop-2-yn-1-ol **B** (1.25 g, 6.0 mmol). The resulting mixture was stirred for 4 h at 80 °C under N<sub>2</sub>. Then, the mixture was allowed to cool to room temperature, and added saturated NH<sub>4</sub>Cl solution, and extracted with ethyl acetate. The combine organic layer was washed with saturated NaCl solution, dried over anhydrous Na<sub>2</sub>SO<sub>4</sub>, and concentrated under reduced pressure. The residue was purified by flash column chromatography (silicagel, petroleum ether/ethyl acetate= 20:1) to give 1,1-diphenyl-3-(2-(phenylethynyl)phenyl)prop-2-yn-1-ol **1a** (1.38 g, yield: 75 %) as yellow solid.

#### IV. The procedure for the synthesis of **3a**, **4a**, **5a**

For the synthesis of 1-(2-aminophenyl)-3,3-diphenylprop-2-en-1-one **3a**

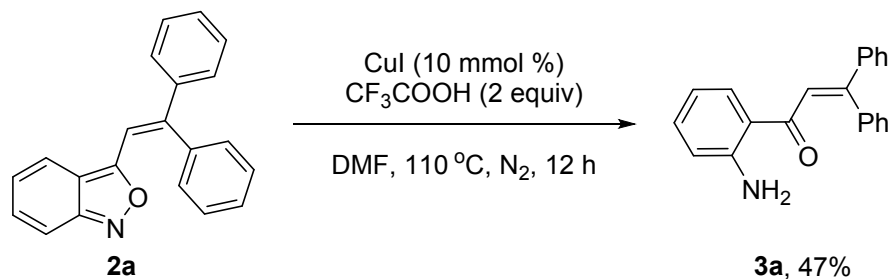

To a Schenk tube equipped with a stir bar, **2a** (0.2 mmol), CuI (0.02 mmol) were added. The Schenk tube was capped with a septum, degassed and backfilled with N<sub>2</sub> for at least three times. Then, the solvent (2.0 ml) and CF<sub>3</sub>COOH (0.4 mmol) were added via syringe. The mixture was stirred at 110 °C for about 12 h. Then, the combined organic layer was evaporated under reduced pressure, and the product was purified by flash chromatography using petroleum ether and ethyl acetate as eluent. Purification by column chromatography (silica gel, eluent: petroleum ether/ethyl acetate = 50:1) afforded product **3a** as a yellow solid in 47% yield.

For the synthesis of N-(2-(3,3-diphenylacryloyl)phenyl)-2-oxo-2-phenylacetamide **4a**

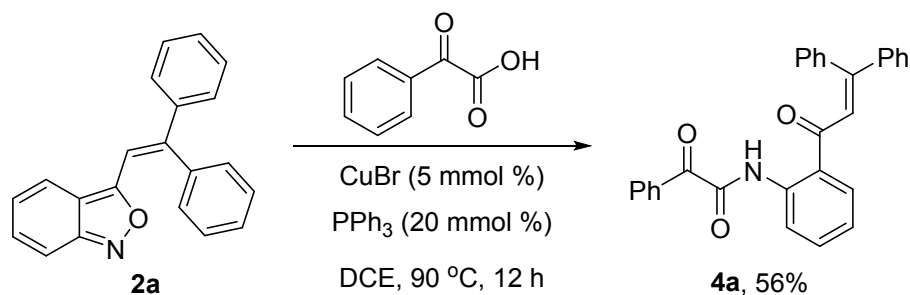

In a round bottomed flask **2a** (0.2 mmol),  $\alpha$ -keto acid (0.4 mmol),  $\text{CuBr}_2$  (0.01 equiv) and  $\text{PPh}_3$  (0.04 equiv,). After the addition of DCE (3 mL), the reaction was stirred at 110 °C for 12 h. The reaction mixture was filtered through celite and concentrated in vacuo. Purification by column chromatography (silica gel, eluent: petroleum ether/ethyl acetate = 50:1) afforded product **4a** as a yellow solid in 56% yield.

For the synthesis of N-(2-(3,3-diphenylacryloyl)phenyl)benzamide **5a**

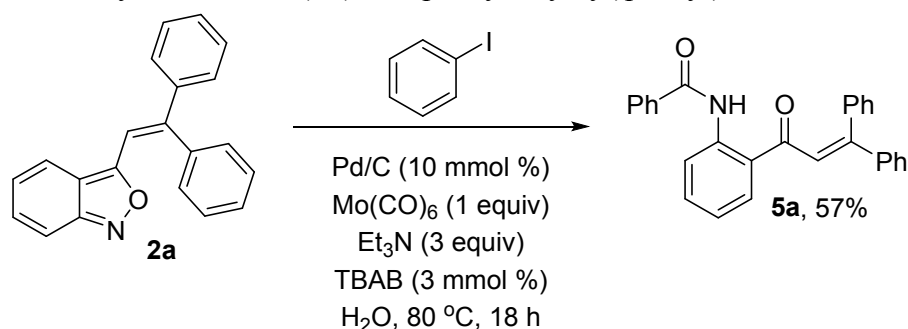

In a 25 mL sealed tube, a mixture of **2a** (0.2 mmol, 1 equiv.), aryl iodides **2** (0.5 mmol, 2.5 equiv.),  $\text{Pd/C}$  (2.1 mg, 10 mol %),  $\text{Mo(CO)}_6$  (0.1 mmol, 0.5 equiv.),  $\text{Et}_3\text{N}$  (0.6 mmol, 3 equiv.), and TBAB (0.006 mmol, 3 mol %) in distilled water (2 mL) was stirred at 80 °C under air. After 18 h, the mixture was cooled to room temperature. The residue was diluted with  $\text{H}_2\text{O}$  solution (10 mL) and extracted with  $\text{EtOAc}$  ( $3 \times 10$  mL). The solvent was then evaporated under vacuum. The crude products were purified by using column chromatography on silica gel (pentane/ethyl acetate) to give product **5a** as a yellow solid in 57% yield.

## V. Crystal data of **2o**

Crystallographic data for compound **2o** (CCDC- 1915267) has been deposited with the Cambridge Crystallographic Data Centre, Copies of the data can be obtained, free of charge, on application to CCDC (Email:deposit@ccdc.cam.ac.uk).

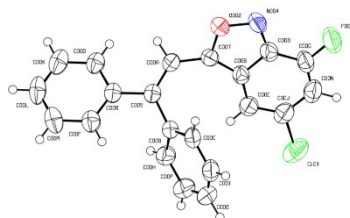

|                                     |                                          |                                              |
|-------------------------------------|------------------------------------------|----------------------------------------------|
| Bond precision:                     | C-C = 0.0042 Å                           | Wavelength=0.71073                           |
| Cell:                               | a=14.1901(8)    b=13.1981(9)             | c=9.2973(6)                                  |
|                                     | alpha=90        beta=103.858(14)         | gamma=90                                     |
| Temperature:                        | 293 K                                    |                                              |
|                                     | Calculated                               | Reported                                     |
| Volume                              | 1690.54(19)                              | 1690.54(19)                                  |
| Space group                         | P 21/c                                   | P 1 21/c 1                                   |
| Hall group                          | -P 2ybc                                  | -P 2ybc                                      |
| Moiety formula                      | C <sub>21</sub> H <sub>13</sub> Cl F N O | C <sub>21</sub> H <sub>13</sub> Cl F N O     |
| Sum formula                         | C <sub>21</sub> H <sub>13</sub> Cl F N O | C <sub>21</sub> H <sub>13</sub> Cl F N O     |
| Mr                                  | 394.77                                   | 394.77                                       |
| D <sub>x</sub> , g cm <sup>-3</sup> | 1.374                                    | 1.374                                        |
| Z                                   | 4                                        | 4                                            |
| Mu (mm <sup>-1</sup> )              | 0.244                                    | 0.244                                        |
| F <sub>000</sub>                    | 720.0                                    | 720.0                                        |
| F <sub>000</sub> '                  | 720.91                                   | 720.91                                       |
| h,k,lmax                            | 19,18,12                                 | 19,17,12                                     |
| Nref                                | 4651                                     | 3894                                         |
| T <sub>min</sub> , T <sub>max</sub> |                                          | 0.244, 1.000                                 |
| T <sub>min</sub> '                  |                                          |                                              |
| Correction method=                  | Not given                                | Theta(max)= 29.347                           |
| Data completeness=                  | 0.837                                    | wR <sub>2</sub> (reflections)= 0.1912( 3894) |
| R(reflections)=                     | 0.0549( 2057)                            |                                              |
| S = 0.920                           | N <sub>par</sub> = 226                   |                                              |

## VI. Analytic data of products

### 3-(2,2-diphenylvinyl)benzo[c]isoxazole (2a)

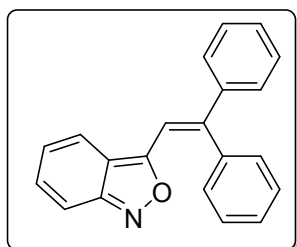

Compound **2a**: Yellow solid (87% yield, 129 mg) <sup>1</sup>H NMR (500 MHz, CDCl<sub>3</sub>) δ 7.45 (d, *J* = 9.0 Hz, 1H), 7.42 – 7.34 (m, 8H), 7.29 (dd, *J* = 7.5, 2.1 Hz, 2H), 7.20 – 7.14 (m, 2H), 6.72 (dd, *J* = 3.2, 1.1 Hz, 2H). <sup>13</sup>C NMR (126 MHz, Chloroform-*d*) δ 164.0, 157.1, 148.4, 141.8, 139.4, 130.4, 130.3, 129.0, 128.7, 128.7, 128.5, 128.3, 123.6, 120.4, 116.0, 115.0, 112.2.

### 3-(2,2-diphenylvinyl)-5-methylbenzo[c]isoxazole (2b)

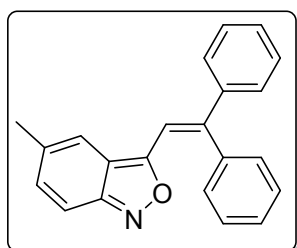

Compound **2b**: Yellow solid (33% yield, 51.3 mg) <sup>1</sup>H NMR (500 MHz, CDCl<sub>3</sub>) δ 7.43 – 7.36 (m, 9H), 7.33 – 7.28 (m, 2H), 7.20 (s, 1H), 7.06 –

6.99 (m, 1H), 6.29 (d,  $J = 1.0$  Hz, 1H), 2.13 (d,  $J = 0.5$  Hz, 3H).  $^{13}\text{C}$  NMR (12 MHz,  $\text{CDCl}_3$ )  $\delta$  163.7, 163.3, 157.1 (d,  $J = 15.7$  Hz), 146.0, 142.0, 141.3, 140.9, 140.5, 138.5, 130.5 (t,  $J = 12.3$  Hz), 129.9, 129.4, 128.94 (d,  $J = 10.1$  Hz), 128.7, 128.4 (d,  $J = 4.1$  Hz), 128.1 (d,  $J = 8.5$  Hz), 127.4 (d,  $J = 19.1$  Hz), 123.9, 123.6, 120.3 (d,  $J = 9.2$  Hz), 116.3 (d,  $J = 6.0$  Hz), 115.2 (s), 115.0 (s), 113.4 (s), 110.0 HRMS (ESI,  $m/z$ ) calcd for  $\text{C}_{22}\text{H}_{17}\text{NO}$   $[\text{M}+\text{H}]^+$ : 312.1383; found: 312.1385.

### 3-(2,2-diphenylvinyl)-5-fluorobenzo[c]isoxazole (2c)

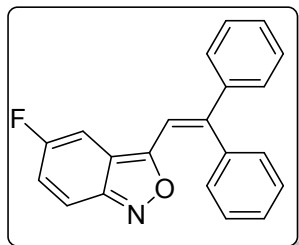

Compound **2c**: Yellow solid (74% yield, 116.6 mg)  $^1\text{H}$  NMR (500 MHz, Chloroform- $d$ )  $\delta$  7.49 (dd,  $J = 9.5, 4.6$  Hz, 1H), 7.44 – 7.35 (m, 8H), 7.30 (dt,  $J = 6.6, 1.6$  Hz, 2H), 7.17 (s, 1H), 7.01 (ddd,  $J = 9.6, 8.4, 2.3$  Hz, 1H), 6.00 (dd,  $J = 9.3, 2.3$  Hz, 1H).  $^{13}\text{C}$  NMR (126 MHz, Chloroform- $d$ )  $\delta$  155.4, 148.1, 141.6, 139.3, 130.3, 129.1, 128.9, 128.9, 128.5, 128.3, 123.5, 123.3, 117.6, 117.5, 112.4, 112.4, 102.6, 102.4.  $^{19}\text{F}$  NMR (471 MHz, Chloroform- $d$ )  $\delta$  -115.3. HRMS (ESI,  $m/z$ ) calcd for  $\text{C}_{21}\text{H}_{14}\text{FNO}$   $[\text{M}+\text{H}]^+$ : 316.1132; found: 316.1128

### 3-(2,2-diphenylvinyl)benzo[c]isoxazole (2d)

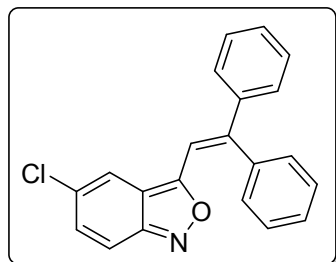

Compound **2d**: Yellow solid (80% yield, 132.5 mg)  $^1\text{H}$  NMR (500 MHz,  $\text{CDCl}_3$ )  $\delta$  7.56 – 7.27 (m, 8H), 7.27 – 7.18 (m, 3H), 7.15 (s, 1H), 7.00 (d,  $J = 8.7$  Hz, 1H), 6.92 – 6.82 (m, 1H).  $^{13}\text{C}$  NMR (125 MHz,  $\text{CDCl}_3$ )  $\delta$  164.0, 155.7, 148.9, 141.39 (s), 139.2, 132.1, 130.3, 129.2, 128.9 (d,  $J = 14.1$  Hz), 128.5, 128.3 (s), 119.3, 116.6, 115.7, 112.2. HRMS (ESI,  $m/z$ ) calcd for  $\text{C}_{21}\text{H}_{14}\text{ClNO}$   $[\text{M}+\text{H}]^+$ : 332.0837; found: 316.0835

### 5-bromo-3-(2,2-diphenylvinyl)benzo[c]isoxazole (2e)

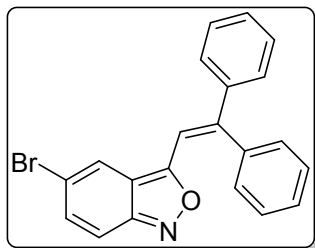

Compound **2e**: Yellow solid (77% yield, 128.0 mg)  $^1\text{H}$  NMR (500 MHz,  $\text{CDCl}_3$ )  $\delta$  7.48 (t,  $J = 7.4$  Hz, 1H), 7.44 – 7.34 (m, 8H), 7.30 (d,  $J = 7.4$  Hz, 2H), 7.24 – 7.16 (m, 2H), 6.51 (s, 1H).  $^{13}\text{C}$  NMR (125 MHz,  $\text{CDCl}_3$ )  $\delta$  163.9, 155.7, 149.0, 141.4, 139.2, 134.2, 130.3, 129.3, 128.96 (d,  $J = 16.3$  Hz), 128.6, 128.3, 123.0, 117.0, 116.7, 116.3, 112.3 HRMS (ESI,  $m/z$ ) calcd for  $\text{C}_{21}\text{H}_{14}\text{BrNO}$   $[\text{M}+\text{H}]^+$ : 376.0332; found: 376.0332

### 3-(2,2-diphenylvinyl)-4-fluorobenzo[c]isoxazole (2f)

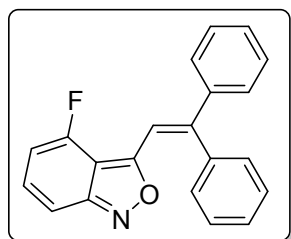

Compound **2f**: Yellow solid (63% yield, 99.2 mg)  $^1\text{H}$  NMR (500 MHz,  $\text{CDCl}_3$ )  $\delta$  7.44 – 7.36 (m, 8H), 7.33 – 7.28 (m, 2H), 7.17 (s, 1H), 7.06 – 6.98 (m, 1H), 6.66 – 6.61 (m, 1H), 6.56 – 6.49 (m, 1H).  $^{13}\text{C}$  NMR (125 MHz,  $\text{CDCl}_3$ )  $\delta$  164.7, 164.5, 162.5, 157.4 (d,  $J = 13.0$  Hz), 149.4, 141.5, 139.2, 130.3, 129.3, 128.9 (d,  $J = 18.4$  Hz), 128.5, 128.4, 123.1 (d,  $J = 11.1$  Hz), 116.5, 116.3, 113.5, 112.0, 97.4, 97.2.  $^{19}\text{F}$  NMR (471 MHz, Chloroform- $d$ )  $\delta$  -106.9. HRMS (ESI,  $m/z$ ) calcd for  $\text{C}_{21}\text{H}_{14}\text{FNO}$   $[\text{M}+\text{H}]^+$ : 316.1132; found: 316.1136

#### 4-chloro-3-(2,2-diphenylvinyl)benzo[c]isoxazole (2g)

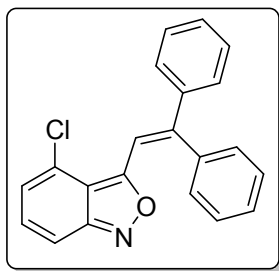

Compound **2g**: Yellow solid (78% yield, 129.1 mg)  $^1\text{H}$  NMR (500 MHz,  $\text{CDCl}_3$ )  $\delta$  7.47 (s, 1H), 7.45 – 7.34 (m, 8H), 7.30 (d,  $J$  = 6.3 Hz, 2H), 7.18 (s, 1H), 6.70 – 6.60 (m, 1H), 6.55 (d,  $J$  = 9.2 Hz, 1H).  $^{13}\text{C}$  NMR (125 MHz,  $\text{CDCl}_3$ )  $\delta$  164.9, 157.3, 149.5, 141.4, 139.2, 136.7, 130.3, 129.3, 128.9 (d,  $J$  = 18.2 Hz), 128.6, 128.4, 125.3, 122.0, 114.1, 113.6, 112.0. HRMS (ESI,  $m/z$ ) calcd for  $\text{C}_{21}\text{H}_{14}\text{ClNO}$   $[\text{M}+\text{H}]^+$ : 332.0837; found: 332.0834

#### 4-bromo-3-(2,2-diphenylvinyl)benzo[c]isoxazole (2h)

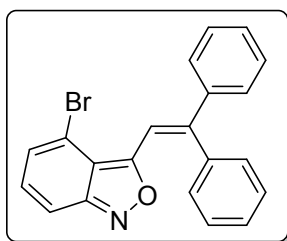

Compound **2h**: Yellow solid (73% yield, 148.2 mg)  $^1\text{H}$  NMR (500 MHz,  $\text{CDCl}_3$ )  $\delta$  7.70 – 7.67 (m, 1H), 7.42 – 7.36 (m, 8H), 7.32 – 7.27 (m, 2H), 7.18 (s, 1H), 6.79 – 6.72 (m, 1H), 6.46 (d,  $J$  = 9.2 Hz, 1H).  $^{13}\text{C}$  NMR (125 MHz,  $\text{CDCl}_3$ )  $\delta$  165.1, 157.7, 149.5, 141.4, 139.2, 130.3, 129.3, 128.9 (d,  $J$  = 19.2 Hz), 128.5 (d,  $J$  = 19.9 Hz), 127.5, 125.3, 121.0, 117.1, 114.2, 112.0. HRMS (ESI,  $m/z$ ) calcd for  $\text{C}_{21}\text{H}_{14}\text{BrNO}$   $[\text{M}+\text{H}]^+$ : 376.0332; found: 376.0332

#### 3-(2,2-diphenylvinyl)-5-nitrobenzo[c]isoxazole (2i)

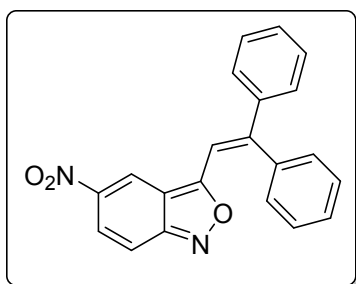

Compound **2i**: Yellow solid (76% yield, 130.0 mg)  $^1\text{H}$  NMR (500 MHz,  $\text{CDCl}_3$ )  $\delta$  7.53 (d,  $J$  = 9.1 Hz, 1H), 7.46 – 7.41 (m, 1H), 7.40 – 7.19 (m, 8H), 6.99 (d,  $J$  = 8.8 Hz, 1H), 6.94 (s, 1H), 6.91 – 6.83 (m, 1H).  $^{13}\text{C}$  NMR (125 MHz,  $\text{CDCl}_3$ )  $\delta$  170.0, 156.8, 152.5, 142.1 (d,  $J$  = 348.9 Hz), 149.8 – 130.2, 129.2, 128.6 (d,  $J$  = 15.8 Hz), 124.4 (s), 121.3, 116.3, 113.7, 111.7. HRMS (ESI,  $m/z$ ) calcd for  $\text{C}_{21}\text{H}_{14}\text{BrN}_2\text{O}_3$   $[\text{M}+\text{H}]^+$ : 343.1077; found: 376.1075

#### 3-(2,2-diphenylvinyl)benzo[c]isoxazole-5-carbonitrile (2j)

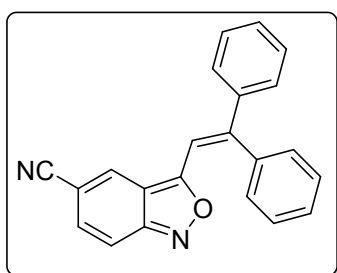

Compound **2j**: Yellow solid (73% yield, 117.5 mg)  $^1\text{H}$  NMR (500 MHz,  $\text{CDCl}_3$ )  $\delta$  7.55 – 7.50 (m, 2H), 7.48 – 7.37 (m, 8H), 7.33 – 7.29 (m, 2H), 7.22 – 7.19 (m, 1H), 6.68 (s, 1H).  $^{13}\text{C}$  NMR (125 MHz,  $\text{CDCl}_3$ )  $\delta$  167.4, 156.0, 151.5, 140.8, 138.9, 130.2 (d,  $J$  = 13.6 Hz), 129.9, 129.6, 129.3, 128.7, 128.5, 118.3, 116.7, 114., 111.9, 107.0. HRMS (ESI,  $m/z$ ) calcd for  $\text{C}_{22}\text{H}_{14}\text{BrN}_2\text{O}$   $[\text{M}+\text{H}]^+$ : 323.1179; found: 323.1182

#### methyl 3-(2,2-diphenylvinyl)benzo[c]isoxazole-5-carboxylate (2k)

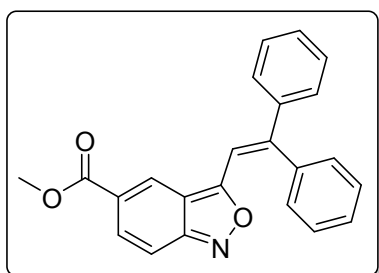

Compound **2k**: Yellow solid (84% yield, 149.2 mg)  $^1\text{H}$  NMR (500 MHz,  $\text{CDCl}_3$ )  $\delta$  7.81 – 7.73 (m, 1H), 7.54 (s, 1H), 7.50 – 7.46 (m, 1H), 7.46 – 7.37 (m, 8H), 7.34 – 7.28 (m, 2H), 3.87 (s, 3H).  $^{13}\text{C}$  NMR (12 MHz,  $\text{CDCl}_3$ )  $\delta$  167., 166., 157.32, 150.6, 141.3, 139.0, 130.2, 129.8, 129.5, 129.2, 128.8, 128.5 (d,  $J$  = 16.3 Hz), 125.9, 125.4, 115.4, 115.0, 111.6, 52.1. HRMS (ESI,  $m/z$ ) calcd for  $\text{C}_{23}\text{H}_{17}\text{NO}_3$   $[\text{M}+\text{H}]^+$ : 356.1281; found: 356.1284



### 3-(2,2-diphenylvinyl)-5-(trifluoromethyl)benzo[*c*]isoxazole (2l)

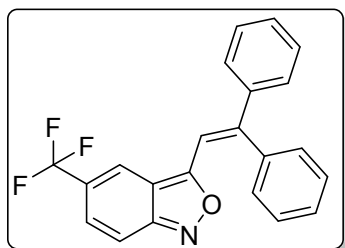

Compound **2l**: Yellow solid (64% yield, 116.8 mg)<sup>1</sup>H NMR (500 MHz, CDCl<sub>3</sub>) δ 7.57 (d, *J* = 9.4 Hz, 1H), 7.47 – 7.37 (m, 8H), 7.33 – 7.25 (m, 4H), 6.77 (d, *J* = 0.9 Hz, 1H). <sup>13</sup>C NMR (125 MHz, CDCl<sub>3</sub>) δ 167.1, 157.0, 150.5, 141.2, 139.0, 130.2, 129.51 (d, *J* = 14.1 Hz), 129.0, 128.6, 128.4, 126.9, 126.12 (d, *J* = 2.7 Hz), 125.7, 125.5, 125.2, 124.0, 124.7, 122.5, 120.53 (q, *J* = 5.3 Hz), 116.5, 113.8, 112.2, <sup>19</sup>F NMR (471 MHz, Chloroform-*d*) δ -63.4. HRMS (ESI, *m/z*) calcd for C<sub>22</sub>H<sub>14</sub>F<sub>3</sub>NO [M+H]<sup>+</sup>: 366.1100; found: 366.1102

### 5-chloro-3-(2,2-diphenylvinyl)-7-fluorobenzo[*c*]isoxazole (2m)

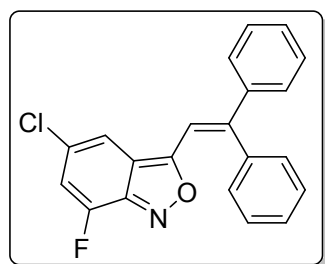

Compound **2m**: Yellow solid (91% yield, 172.4 mg)<sup>1</sup>H NMR (500 MHz, CDCl<sub>3</sub>) δ 7.53 – 7.48 (m, 1H), 7.48 – 7.38 (m, 7H), 7.35 – 7.29 (m, 2H), 7.20 (s, 1H), 6.90 – 6.78 (m, 1H), 6.22 (d, *J* = 1.4 Hz, 1H). <sup>13</sup>C NMR (125 MHz, CDCl<sub>3</sub>) δ 165.2 (d, *J* = 3.4 Hz), 151.1, 150.0, 149.1 (d, *J* = 16.6 Hz), 141.1, 139.0, 130.2, 129.5, 129.2, 128.9, 128.6, 128.4, 127.8 (d, *J* = 6.4 Hz), 117.5 (d, *J* = 4.5 Hz), 115.6 (d, *J* = 5.8 Hz), 114.9 (d, *J* = 19.0 Hz), 111.67 (s). <sup>19</sup>F NMR (471 MHz, Chloroform-*d*) δ -123.7. HRMS (ESI, *m/z*) calcd for C<sub>21</sub>H<sub>13</sub>ClFNO [M+H]<sup>+</sup>: 350.0742; found: 350.0745

### 4-chloro-3-(2,2-diphenylvinyl)-5-fluorobenzo[*c*]isoxazole (2n)

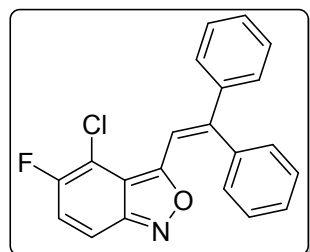

Compound **2n**: Yellow solid (98% yield, 187.2 mg)<sup>1</sup>H NMR (500 MHz, CDCl<sub>3</sub>) δ 7.48 – 7.44 (m, 2H), 7.43 – 7.36 (m, 6H), 7.33 (d, *J* = 3.6 Hz, 2H), 7.29 – 7.22 (m, 2H), 6.62 (s, 1H). <sup>13</sup>C NMR (125 MHz, CDCl<sub>3</sub>) δ 183.1 (d, *J* = 3.5 Hz), 157.4, 155.5, 144.9, 139.5, 137.3, 133.4, 132.7, 130.5, 130.2, 129.0 (d, *J* = 2.7 Hz), 128.8, 128.2, 123.9 (d, *J* = 7.6 Hz), 122.7, 122.5, 116.9 (d, *J* = 10.0 Hz), 109.2, 109.0. <sup>19</sup>F NMR (471 MHz, Chloroform-*d*) δ -122.3. HRMS (ESI, *m/z*) calcd for C<sub>21</sub>H<sub>13</sub>ClFNO [M+H]<sup>+</sup>: 350.0742; found: 350.0743

### 3-(2,2-diphenylvinyl)-5-ethyl-7-iodobenzo[*c*]isoxazole (2o)

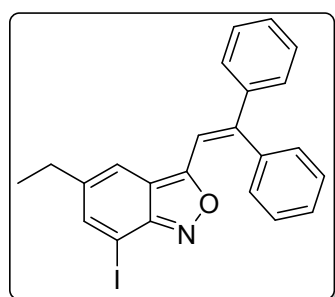

Compound **2o**: Yellow solid (72% yield, 167.4 mg)<sup>1</sup>H NMR (500 MHz, CDCl<sub>3</sub>) δ 7.64 (s, 1H), 7.48 – 7.31 (m, 11H), 6.53 (s, 1H), 2.59 (d, *J* = 7.6 Hz, 2H), 1.20 (t, *J* = 7.6 Hz, 3H). <sup>13</sup>C NMR (125 MHz, CDCl<sub>3</sub>) δ 184.7, 151.0, 143.5, 139.7, 137.8, 137.6, 132.9, 131.6, 130.6, 130.2, 129.0, 128.8, 128.6, 128.1, 123.8, 123.5, 27.9, 15.8. HRMS (ESI, *m/z*) calcd for C<sub>23</sub>H<sub>18</sub>INO [M+H]<sup>+</sup>: 452.0506; found: 452.0503

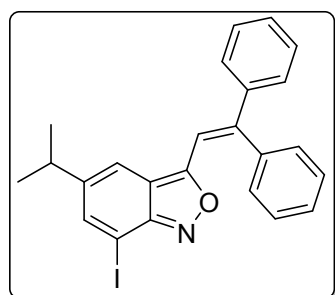

### 3-(2,2-diphenylvinyl)-7-iodo-5-isopropylbenzo[*c*]isoxazole (2p)

Compound **2p**: Yellow solid (98% yield, 227.9 mg)<sup>1</sup>H NMR (500 MHz, CDCl<sub>3</sub>) δ 7.64 (s, 1H), 7.48 – 7.31 (m, 11H), 6.53 (s, 1H), 2.59 (d, *J* = 7.6 Hz, 2H), 1.20 (t, *J* = 7.6 Hz, 3H). <sup>13</sup>C NMR (125 MHz, CDCl<sub>3</sub>) δ 184.7, 151.0, 143.5, 139.7, 137.8, 137.6, 132.9, 131.6, 130.6, 130.2, 129.0, 128.8, 128.6, 128.1, 123.8, 123.5, 27.9, 15.8. HRMS (ESI, *m/z*) calcd for C<sub>23</sub>H<sub>18</sub>INO [M+H]<sup>+</sup>: 452.0506; found: 452.0503

MHz, CDCl<sub>3</sub>)  $\delta$  7.67 (d,  $J$  = 1.5 Hz, 1H), 7.49 – 7.32 (m, 11H), 6.54 (s, 1H), 2.89 – 2.81 (m, 1H), 1.23 (d,  $J$  = 6.9 Hz, 6H). <sup>13</sup>C NMR (125 MHz, CDCl<sub>3</sub>)  $\delta$  184.8 151.1, 142.7, 142.4, 139.8 (s), 137.6, 133.0, 131.7, 130.6, 130.2, 129.0, 128.8, 128.6, 128.1, 123.8, 122.1, 33.4, 24.1. HRMS (ESI,  $m/z$ ) calcd for C<sub>24</sub>H<sub>20</sub>INO [M+H]<sup>+</sup>: 466.0662; found: 466.0661

#### 5-(tert-butyl)-3-(2,2-diphenylvinyl)-7-iodobenzo[*c*]isoxazole (2q)

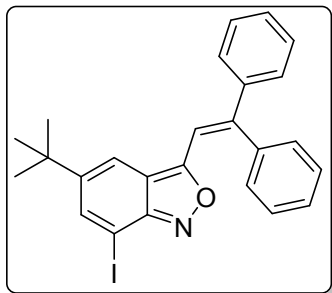

Compound **2q**: Yellow solid (73% yield, 184.4 mg) <sup>1</sup>H NMR (500 MHz, CDCl<sub>3</sub>)  $\delta$  7.64 (s, 1H), 7.48 – 7.31 (m, 11H), 6.53 (s, 1H), 2.59 (d,  $J$  = 7.6 Hz, 2H), 1.57 (s, 2H), 1.20 (t,  $J$  = 7.6 Hz, 3H). <sup>13</sup>C NMR (125 MHz, CDCl<sub>3</sub>)  $\delta$  184.9, 150.8, 145.1, 141.4, 139.7, 137.6 133.0, 131.7, 130.6, 130.2, 129.0, 128.8, 128.6, 128.1, 123.5, 121.2, 34.5, 31.4. HRMS (ESI,  $m/z$ ) calcd for C<sub>25</sub>H<sub>22</sub>INO [M+H]<sup>+</sup>: 466.0662; found: 466.0661

#### 3-(2,2-di-*p*-tolylvinyl)benzo[*c*]isoxazole (2r)

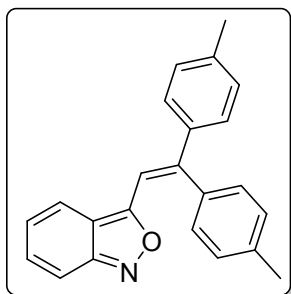

Compound **2r**: Yellow solid (33% yield, 64.9 mg) <sup>1</sup>H NMR (500 MHz, CDCl<sub>3</sub>)  $\delta$  7.47 (d,  $J$  = 9.0 Hz, 1H), 7.30 (d,  $J$  = 8.2 Hz, 2H), 7.21 – 7.15 (m, 7H), 7.13 (s, 1H), 6.81 – 6.71 (m, 2H), 2.40 (s, 6H). <sup>13</sup>C NMR (125 MHz, CDCl<sub>3</sub>)  $\delta$  164.4, 157.1, 148.6, 139.2 (d,  $J$  = 1.4 Hz), 138.6, 136.5, 130.3 (d,  $J$  = 18.2 Hz), 129.2 (d,  $J$  = 17.6 Hz), 128.32, 123.2, 120.6, 115.9, 115.0, 111.1, 21.4 (d,  $J$  = 14.3 Hz). HRMS (ESI,  $m/z$ ) calcd for C<sub>23</sub>H<sub>19</sub>NO [M+H]<sup>+</sup>: 326.1539; found: 326.1543

#### 3-(2,2-bis(3,5-dimethylphenyl)vinyl)benzo[*c*]isoxazole (2s)

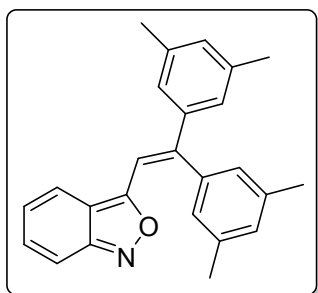

Compound **2s**: Yellow solid (43% yield, 82.3 mg) <sup>1</sup>H NMR (500 MHz, CDCl<sub>3</sub>)  $\delta$  7.47 (d,  $J$  = 9.0 Hz, 1H), 7.22 – 7.16 (m, 1H), 7.13 (s, 1H), 7.05 – 7.00 (m, 4H), 6.90 (s, 2H), 6.75 – 6.65 (m, 2H), 2.33 (s, 6H), 2.27 (s, 6H). <sup>13</sup>C NMR (126 MHz, CDCl<sub>3</sub>)  $\delta$  164., 157.1, 149.0, 142.1, 139.32, 138.0 (d,  $J$  = 15.4 Hz), 130.7, 130.3 (d,  $J$  = 10.9 Hz), 127.9, 126.2, 122.2, 120.8, 115.8, 114.9, 112.0, 21.3 (d,  $J$  = 2.7 Hz). HRMS (ESI,  $m/z$ ) calcd for C<sub>25</sub>H<sub>23</sub>NO [M+H]<sup>+</sup>: 354.1852; found: 354.1855

#### 3-(2,2-bis(4-fluorophenyl)vinyl)benzo[*c*]isoxazole (2t)

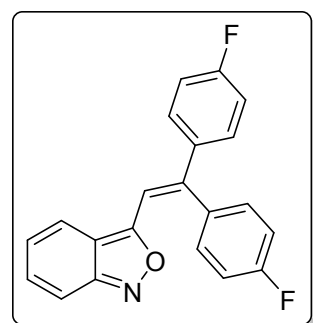

Compound **2t**: Yellow solid (53% yield, 109.1 mg) <sup>1</sup>H NMR (500 MHz, CDCl<sub>3</sub>)  $\delta$  7.48 (d,  $J$  = 8.7 Hz, 1H), 7.36 (s, 2H), 7.32 – 7.17 (m, 3H), 7.09 (d,  $J$  = 18.1 Hz, 5H), 6.93 (d,  $J$  = 8.5 Hz, 1H), 6.88 – 6.77 (m, 1H). <sup>13</sup>C NMR (125 MHz, CDCl<sub>3</sub>)  $\delta$  164.3, 164.0, 163.4, 162.4, 162.0, 157.0, 146.12, 137.8 (d,  $J$  = 3.2 Hz), 135.1 (d,  $J$  = 3.5 Hz), 132.1 (d,  $J$

= 8.2 Hz), 130.61, 130.1 (d,  $J = 8.3$  Hz), 123.9, 120.0, 116.3, 115.9, 115.7 (d,  $J = 9.0$  Hz), 115.5 (s), 115.2 (s), 111.9.  $^{19}\text{F}$  NMR (471 MHz, Chloroform- $d$ )  $\delta$  -111.8, -112.1. HRMS (ESI,  $m/z$ ) calcd for  $\text{C}_{21}\text{H}_{13}\text{F}_2\text{NO}$   $[\text{M}+\text{H}]^+$ : 334.1038; found: 334.1039

### 3-(2,2-bis(4-chlorophenyl)vinyl)benzo[*c*]isoxazole (2u)

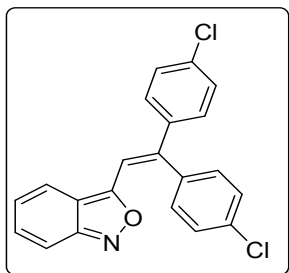

Compound **2u**: Yellow solid (51% yield, 93.1 mg) $^1\text{H}$  NMR (500 MHz,  $\text{CDCl}_3$ )  $\delta$  7.49 (d,  $J = 9.0$  Hz, 1H), 7.40 – 7.28 (m, 6H), 7.27 – 7.18 (m, 3H), 7.15 (s, 1H), 7.00 (d,  $J = 8.7$  Hz, 1H), 6.92 – 6.82 (m, 1H).  $^{13}\text{C}$  NMR (125MHz,  $\text{CDCl}_3$ )  $\delta$  163.0, 157.0, 145.6, 139.8, 137.4, 135.3, 134.9, 131.5, 130.7, 129.5, 129.0, 128.8, 124.2, 119.9, 116.7, 115.3, 112.2. HRMS (ESI,  $m/z$ ) calcd for  $\text{C}_{21}\text{H}_{13}\text{Cl}_2\text{NO}$   $[\text{M}+\text{H}]^+$ : 366.0447; found: 366.0445

### 3-(2,2-bis(4-bromophenyl)vinyl)benzo[*c*]isoxazole (2v)

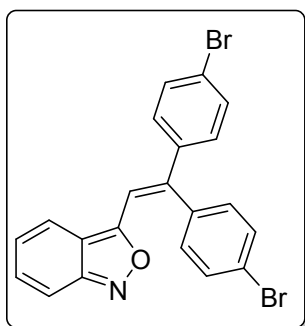

Compound **2v**: Yellow solid (43% yield, 97.4 mg) $^1\text{H}$  NMR (500 MHz,  $\text{CDCl}_3$ )  $\delta$  7.57 – 7.36 (m, 9H), 7.31 (s, 1H), 7.19 (s, 1H), 7.09 (d,  $J = 9.3$  Hz, 1H), 6.36 (s, 1H).  $^{13}\text{C}$  NMR (125 MHz,  $\text{CDCl}_3$ )  $\delta$  164.0, 155.7, 148.9, 141.4, 139.2, 132.1 (d,  $J = 19.1$  Hz), 131.8 (d,  $J = 1.9$  Hz), 130.3, 129.7, 129.3, 129.1 – 128.8, 128.5, 128.3, 119.3, 116.6, 115.7, 112.2. HRMS (ESI,  $m/z$ ) calcd for  $\text{C}_{21}\text{H}_{13}\text{Br}_2\text{NO}$   $[\text{M}+\text{H}]^+$ : 453.9437; found: 453.9435

### 3-(2-phenyl-2-(*p*-tolyl)vinyl)benzo[*c*]isoxazole (2w)

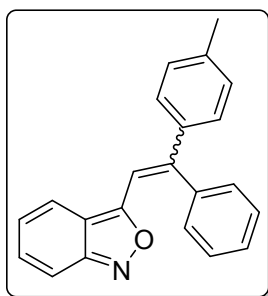

Compound **2w**: Yellow solid (44% yield, 68.4 mg) $^1\text{H}$  NMR (500 MHz,  $\text{CDCl}_3$ )  $\delta$  7.50 – 7.46 (m, 1H), 7.44 – 7.37 (m, 4H), 7.34 – 7.29 (m, 2H), 7.23 – 7.15 (m, 5H), 6.84 – 6.72 (m, 2H), 2.41 (d,  $J = 3.4$  Hz, 3H).  $^{13}\text{C}$  NMR (125 MHz,  $\text{CDCl}_3$ )  $\delta$  164.2, 157.1 (d,  $J = 2.0$  Hz), 148.6, 148.4, 142.0, 139.5, 139.3, 138.9, 138.7, 130.4 (dd,  $J = 18.3, 4.9$  Hz), 129.3 (d,  $J = 16.1$  Hz), 129.0, 128.7 (d,  $J = 2.9$  Hz), 128.4 (d,  $J = 2.6$  Hz), 128.3, 123.4 (d,  $J = 3.7$  Hz), 120.5 (d,  $J = 8.9$  Hz), 115.0 (d,  $J = 2.4$  Hz), 111.8, 111.4, 21.4 (d,  $J = 14.7$  Hz). HRMS (ESI,  $m/z$ ) calcd for  $\text{C}_{22}\text{H}_{17}\text{NO}$   $[\text{M}+\text{H}]^+$ : 312.1383; found:

312.1385

### 3-(2-(3,4-dimethylphenyl)-2-phenylvinyl)benzo[*c*]isoxazole (2x)

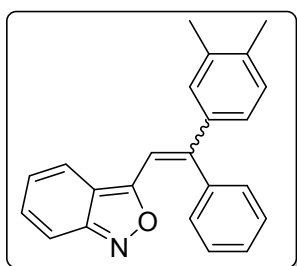

Compound **2x**: Yellow solid (61% yield, 99.1 mg) $^1\text{H}$  NMR (500 MHz,  $\text{CDCl}_3$ )  $\delta$  7.50 – 7.35 (m, 5H), 7.34 – 7.28 (m, 1H), 7.22 – 7.10 (m, 4H), 7.08 – 7.02 (m, 1H), 6.80 – 6.70 (m, 2H), 2.34 – 2.19 (m, 6H).  $^{13}\text{C}$  NMR (125 MHz,  $\text{CDCl}_3$ )  $\delta$  164.3 (d,  $J = 1.9$  Hz), 157.1 (d,  $J = 3.4$  Hz), 148.7, 148.6, 142.2, 139.6, 139.4, 138.0, 137.2, 136.8 (d,  $J = 10.8$  Hz), 131.3, 130.5 – 130.2 (m), 129.8 (d,  $J = 11.8$  Hz), 129.4, 128.9, 128.6, 128.4, 127.8, 126.0, 123.3 (d,  $J = 10.9$  Hz), 120.6 (d,  $J = 17.1$  Hz), 116.01, 115.8,

115.0, 111.7, 111.4, 19.8 (dd,  $J = 17.3, 12.0$  Hz). HRMS (ESI,  $m/z$ ) calcd for  $\text{C}_{23}\text{H}_{19}\text{NO}$   $[\text{M}+\text{H}]^+$ :

326.1539; found: 326.1543

**3-(2-(4-methoxyphenyl)-2-phenylvinyl)benzo[c]isoxazole (2y)**

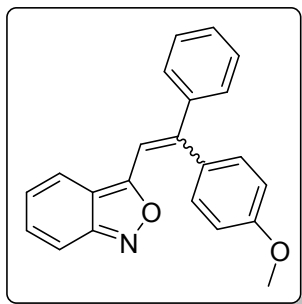

Compound **2y**: Yellow solid (20% yield, 43.6 mg)<sup>1</sup>H NMR (500 MHz, CDCl<sub>3</sub>) δ 7.48 (d, *J* = 9.1 Hz, 1H), 7.42 – 7.33 (m, 5H), 7.26 – 7.13 (m, 3H), 7.10 (s, 1H), 6.93 – 6.87 (m, 2H), 6.83 (d, *J* = 8.8 Hz, 1H), 6.79 – 6.72 (m, 1H), 3.85 (d, *J* = 2.7 Hz, 3H). <sup>13</sup>C NMR (125 MHz, CDCl<sub>3</sub>) δ 164.4, 160.0, 157.1, 142.3, 131.8, 131.6, 130.4 (d, *J* = 18.2 Hz), 129.7, 129.0, 128.5 (t, *J* = 14.6 Hz), 123.4, 120.6, 115.0, 114.0 (d, *J* = 22.1 Hz), 111.6, 55.3. HRMS (ESI, *m/z*) calcd for C<sub>22</sub>H<sub>17</sub>NO<sub>2</sub> [M+H]<sup>+</sup>: 328.1332; found: 328.1333

**3-(2-(2-chlorophenyl)-2-(3-chlorophenyl)vinyl)benzo[c]isoxazole (2z)**

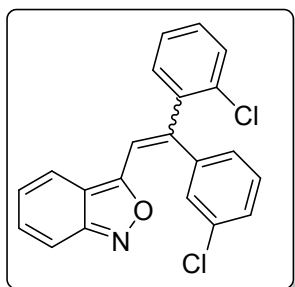

Compound **2z**: Yellow solid (46% yield, 84.2 mg)<sup>1</sup>H NMR (500 MHz, CDCl<sub>3</sub>) δ 7.53 (d, *J* = 9.1 Hz, 1H), 7.46 – 7.41 (m, 1H), 7.40 – 7.19 (m, 8H), 6.99 (d, *J* = 8.8 Hz, 1H), 6.94 (s, 1H), 6.91 – 6.83 (m, 1H). <sup>13</sup>C NMR (125 MHz, CDCl<sub>3</sub>) δ 162.6, 157.0, 145.0, 141.0, 137.3, 134.7, 133.3, 131.6, 131.0, 130.7, 130.4, 129.9, 128.6, 126.9, 124.3, 120.0, 116.8, 115.8, 115.3. HRMS (ESI, *m/z*) calcd for C<sub>21</sub>H<sub>13</sub>Cl<sub>2</sub>NO [M+H]<sup>+</sup>: 366.0447; found: 366.0447

**5-chloro-7-fluoro-3-(2-(4-fluorophenyl)-2-(4-methoxyphenyl)vinyl)benzo[c]isoxazole (2aa)**

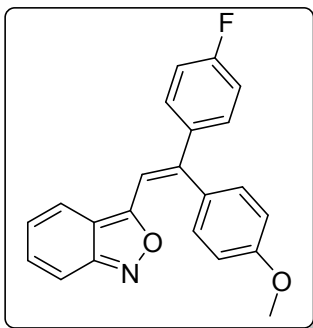

Compound **2aa**: Yellow solid (40% yield, 69.0 mg)<sup>1</sup>H NMR (500 MHz, CDCl<sub>3</sub>) δ 7.50 – 7.45 (m, 1H), 7.40 – 7.36 (m, 1H), 7.35 – 7.31 (m, 1H), 7.31 – 7.27 (m, 1H), 7.24 – 7.17 (m, 2H), 7.11 – 7.03 (m, 3H), 6.95 – 6.82 (m, 3H), 6.81 – 6.75 (m, 1H), 3.85 (d, *J* = 5.0 Hz, 3H). <sup>13</sup>C NMR (125 MHz, CDCl<sub>3</sub>) δ 157.1 (d, *J* = 13.4 Hz), 218.3 – 115.2, 132.10 (d, *J* = 8.2 Hz), 131.8, 130.5 (d, *J* = 7.1 Hz), 130.3 (d, *J* = 8.2 Hz), 129.7, 123.5 (d, *J* = 3.6 Hz), 120.5, 120.3 (d, *J* = 41.8 Hz), 120.9 – 115.9, 118.1 (dd, *J* = 555.5, 37.8 Hz), 115.0 (d, *J* = 3.9 Hz), 114.1, 114.0, 55.4 (d, *J* = 11.6 Hz). <sup>19</sup>F NMR (471 MHz, Chloroform-*d*) δ -63.4. HRMS (ESI, *m/z*) calcd for C<sub>22</sub>H<sub>16</sub>FNO<sub>2</sub> [M+H]<sup>+</sup>: 346.1238; found: 346.1239

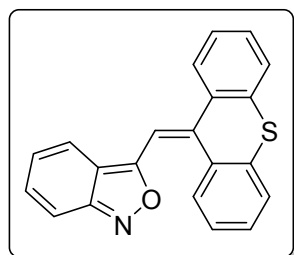

**3-((9H-thioxanthen-9-ylidene)methyl)benzo[c]isoxazole (2ab)**

Compound **2aa**: (47% yield, 76.8 mg)<sup>1</sup>H NMR (500 MHz, CDCl<sub>3</sub>) δ 7.85 – 7.79 (m, 1H), 7.61 – 7.47 (m, 4H), 7.42 – 7.27 (m, 3H), 7.25 – 7.19 (m, 1H), 7.18 – 7.11 (m, 1H), 7.01 (s, 1H), 6.88 (d, *J* = 8.8 Hz, 1H), 6.82 – 6.76 (m, 1H). <sup>13</sup>C NMR (125 MHz, CDCl<sub>3</sub>) δ 163.9, 155.7, 149.0, 141.4, 139.2, 134.2, 130.3, 129.3, 129.0 (d, *J* = 16.3 Hz), 128.6, 128.3, 123.0, 117.0, 116.7, 116.3, 112.3. HRMS (ESI, *m/z*) calcd for C<sub>21</sub>H<sub>13</sub>NOS [M+H]<sup>+</sup>: 328.0791; found: 328.0791

### 1-(2-aminophenyl)-3,3-diphenylprop-2-en-1-one (3a)

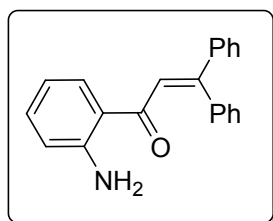

Compound **3a**: (47% yield, 28.2 mg)  $^1\text{H}$  NMR (500 MHz, Chloroform-*d*)  $\delta$  7.82 (dd,  $J = 8.1, 1.6$  Hz, 1H), 7.37 (s, 5H), 7.29 (dd,  $J = 5.0, 1.8$  Hz, 3H), 7.21 (ddd,  $J = 7.6, 4.2, 2.6$  Hz, 3H), 7.06 (s, 1H), 6.65 – 6.55 (m, 2H), 6.15 (s, 2H).  $^{13}\text{C}$  NMR (125 MHz, Chloroform-*d*)  $\delta$  195.4, 151.7, 150.5, 141.7, 139.3, 134.3, 132.5, 129.7, 128.9, 128.5, 128.4, 128.1, 128.1, 126.4, 119.4, 117.0, 115.7. HRMS (ESI,  $m/z$ ) calcd for  $\text{C}_{21}\text{H}_{17}\text{NO}$   $[\text{M}+\text{H}]^+$ : 300.1383;

found: 300.1389

### N-(2-(3,3-diphenylacryloyl)phenyl)-2-oxo-2-phenylacetamide (4a)

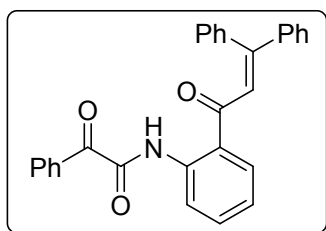

Compound **4a**: (56% yield, 48.3 mg)  $^1\text{H}$  NMR (500 MHz, Chloroform-*d*)  $\delta$  12.37 (s, 1H), 8.72 (dd,  $J = 8.4, 1.1$  Hz, 1H), 8.38 – 8.30 (m, 2H), 7.98 (dd,  $J = 7.9, 1.6$  Hz, 1H), 7.64 (td,  $J = 7.3, 1.4$  Hz, 1H), 7.57 – 7.45 (m, 4H), 7.42 – 7.36 (m, 5H), 7.28 (s, 1H), 7.25 (d,  $J = 0.7$  Hz, 1H), 7.19 – 7.16 (m, 2H), 7.12 (td,  $J = 7.6, 1.2$  Hz, 1H), 7.00 (s, 1H).  $^{13}\text{C}$  NMR (126 MHz, Chloroform-*d*)  $\delta$  196.8, 187.2, 160.8, 154.7,

141.0, 138.9, 138.7, 134.4, 134.2, 133.3, 132.0, 131.2, 129.8, 129.5, 128.7, 128.7, 128.5, 128.2, 125.4, 125.2, 123.6, 121.0. HRMS (ESI,  $m/z$ ) calcd for  $\text{C}_{29}\text{H}_{21}\text{NO}_3$   $[\text{M}+\text{H}]^+$ : 432.1594; found: 432.1601

### N-(2-(3,3-diphenylacryloyl)phenyl)benzamide (5a)

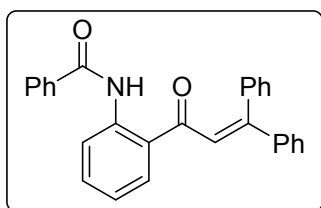

Compound **5a**: (57% yield, 45.9 mg)  $^1\text{H}$  NMR (500 MHz, Chloroform-*d*)  $\delta$  7.82 (dd,  $J = 8.1, 1.6$  Hz, 1H), 7.37 (s, 5H), 7.29 (dd,  $J = 5.0, 1.8$  Hz, 3H), 7.21 (ddd,  $J = 7.6, 4.2, 2.6$  Hz, 3H), 7.06 (s, 1H), 6.65 – 6.55 (m, 2H), 6.15 (s, 2H).  $^{13}\text{C}$  NMR (126 MHz, Chloroform-*d*)  $\delta$  197.9, 166.1, 154.0, 141.1, 141.0, 138.7, 134.9, 134.7, 132.2, 131.9, 129.8, 129.5, 128.8, 128.7, 128.5, 128.3, 127.6, 125.8, 123.8, 122.5,

120.9. HRMS (ESI,  $m/z$ ) calcd for  $\text{C}_{28}\text{H}_{21}\text{NO}_2$   $[\text{M}+\text{H}]^+$ : 404.1645; found: 404.1640

## VII. $^1\text{H}$ $^{13}\text{C}$ and $\text{F}^{19}$ NMR spectra of products

### 3-(2,2-diphenylvinyl)benzo[c]isoxazole (2a)

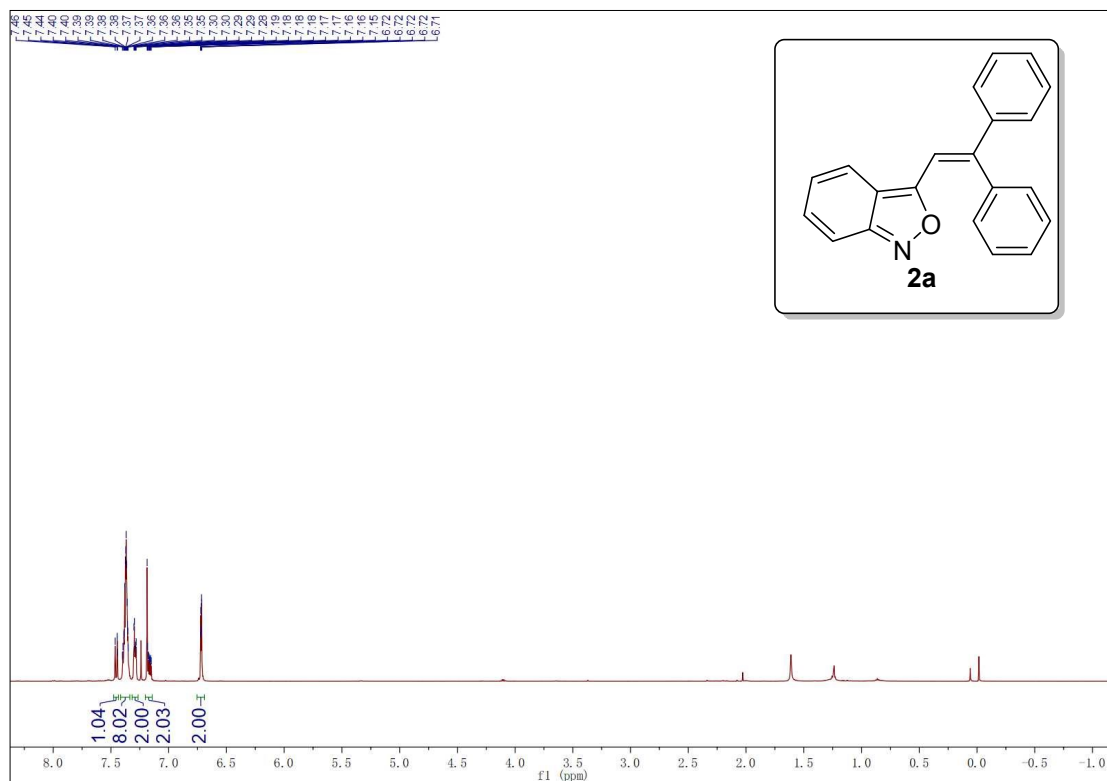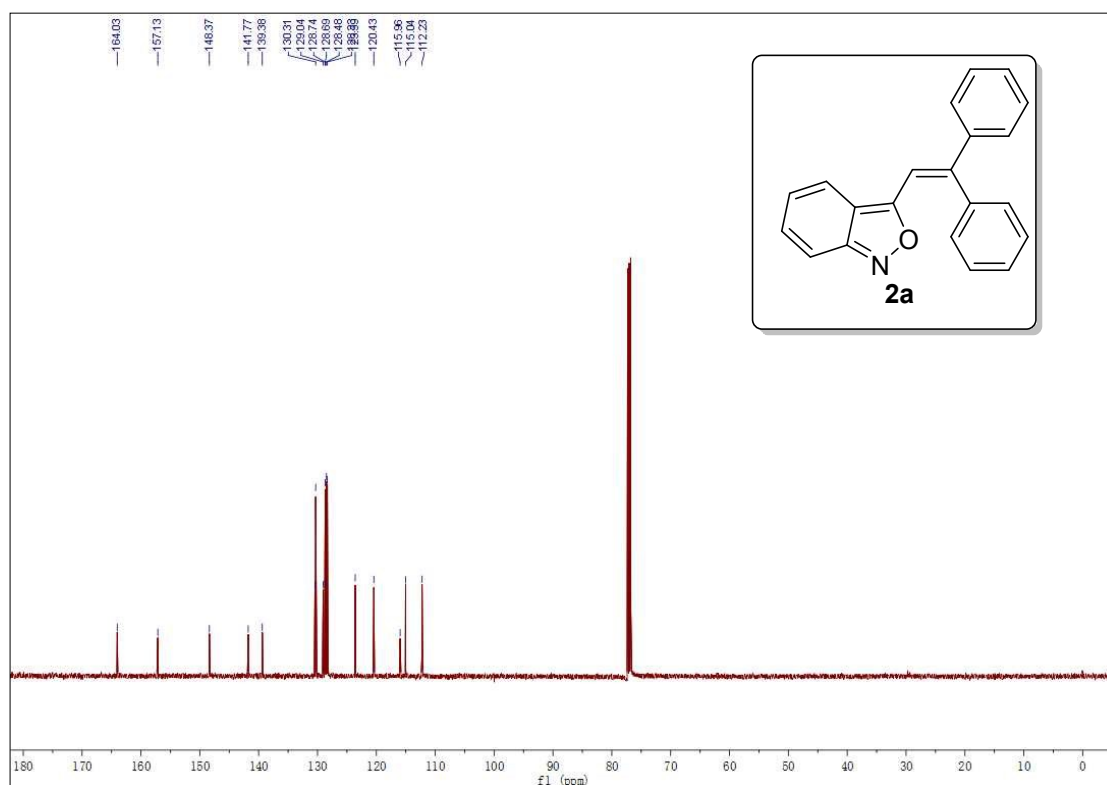

### 3-(2,2-diphenylvinyl)-5-methylbenzo[c]isoxazole (2b)

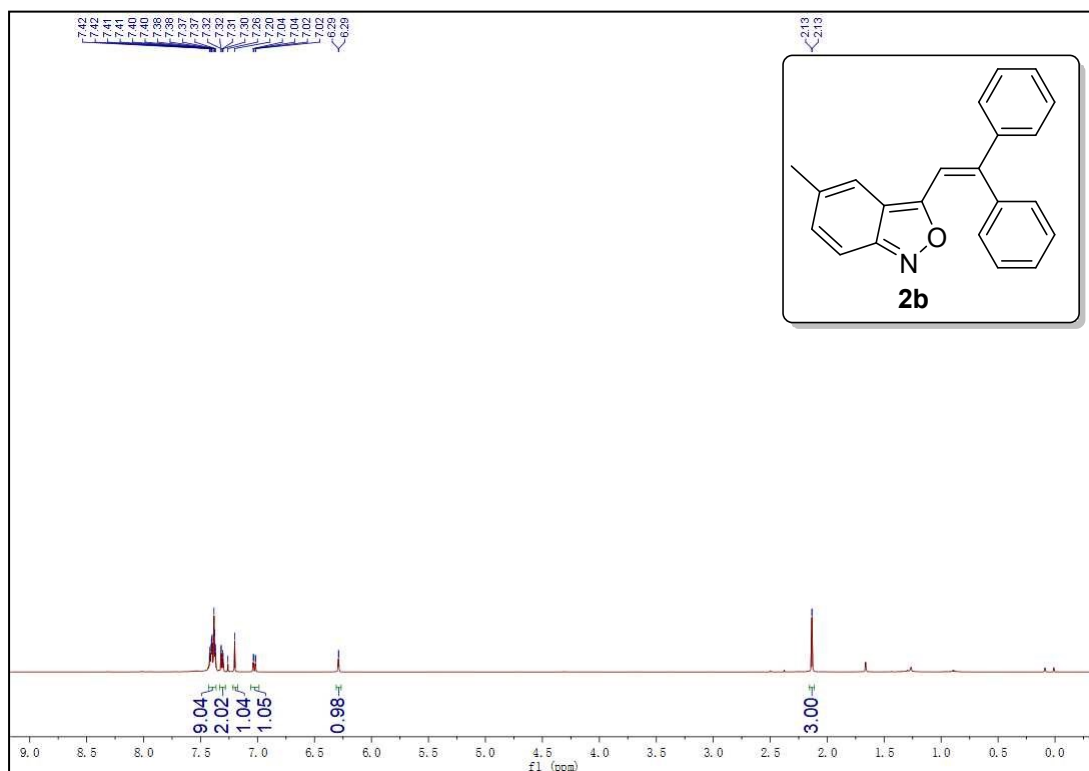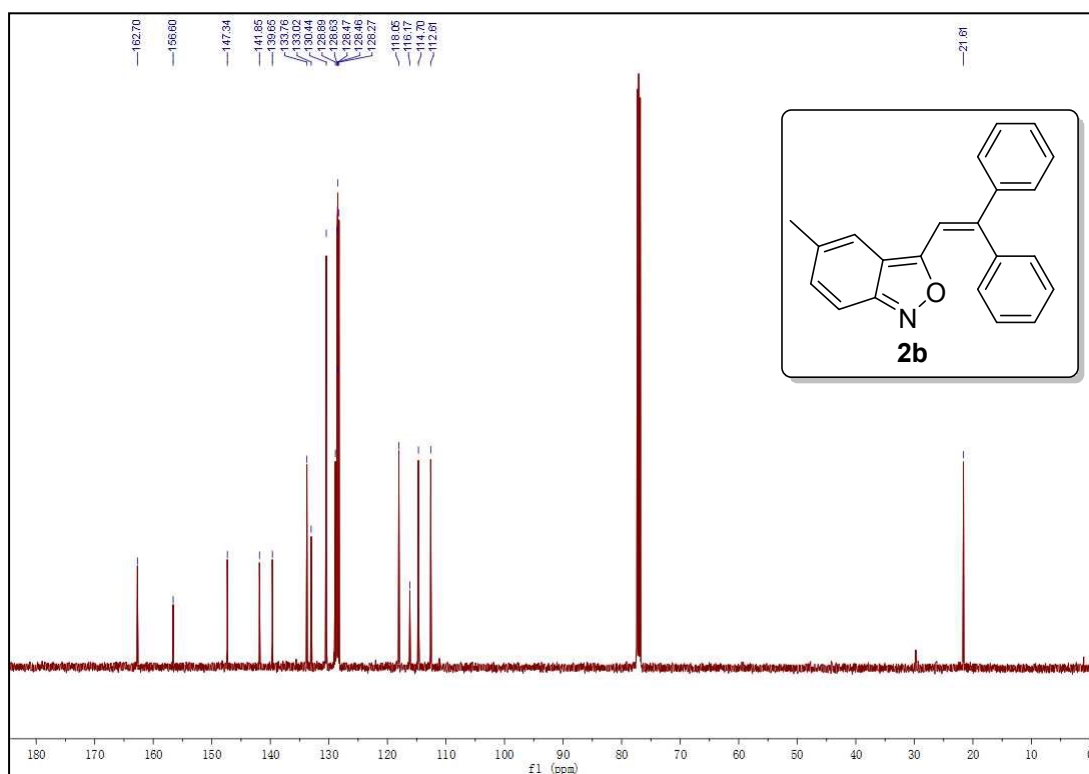

### 3-(2,2-diphenylvinyl)-5-fluorobenzo[c]isoxazole (2c)

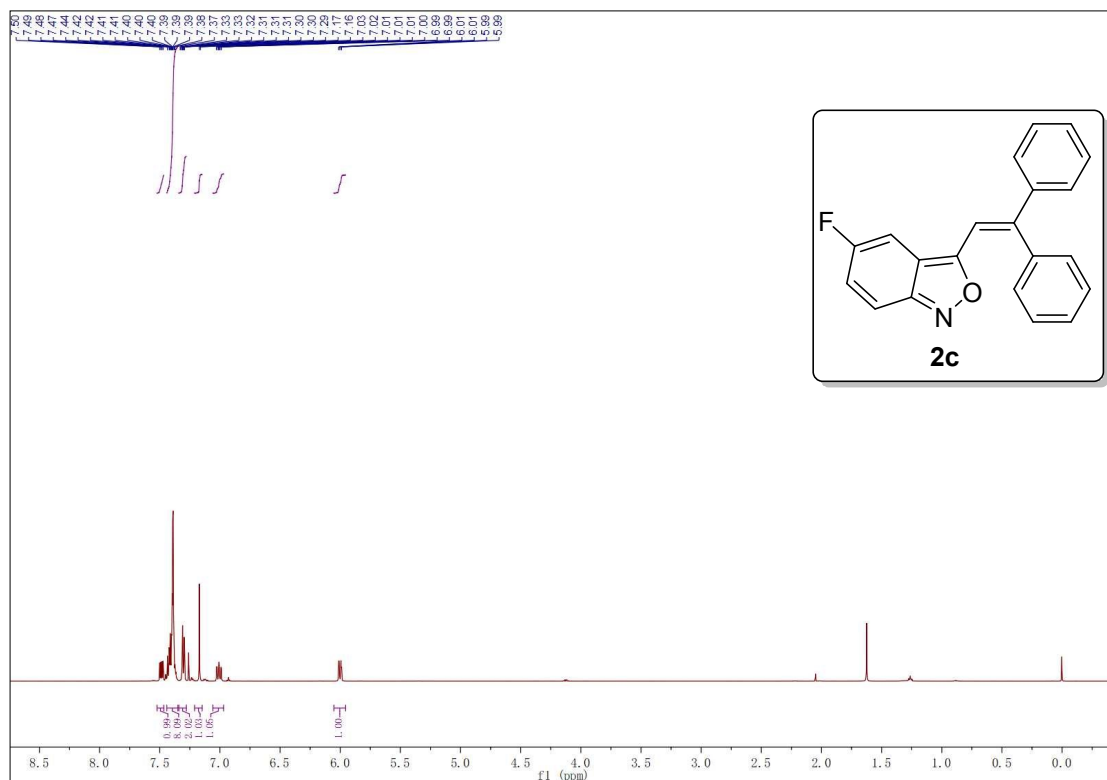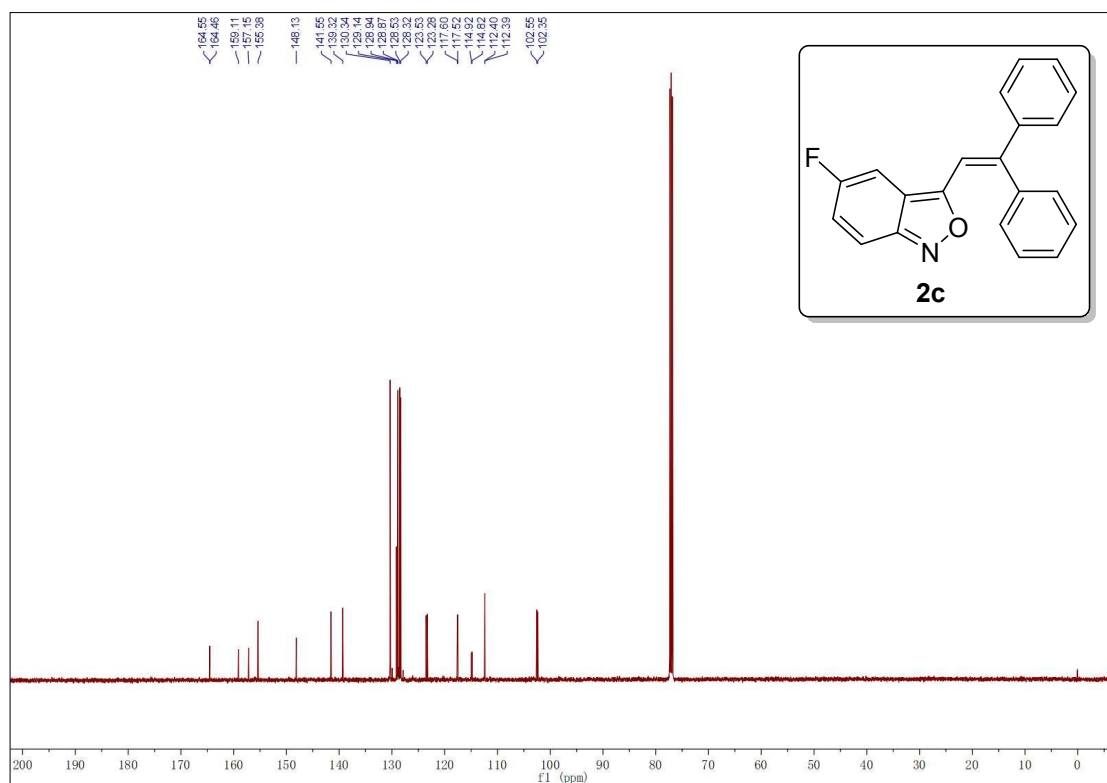



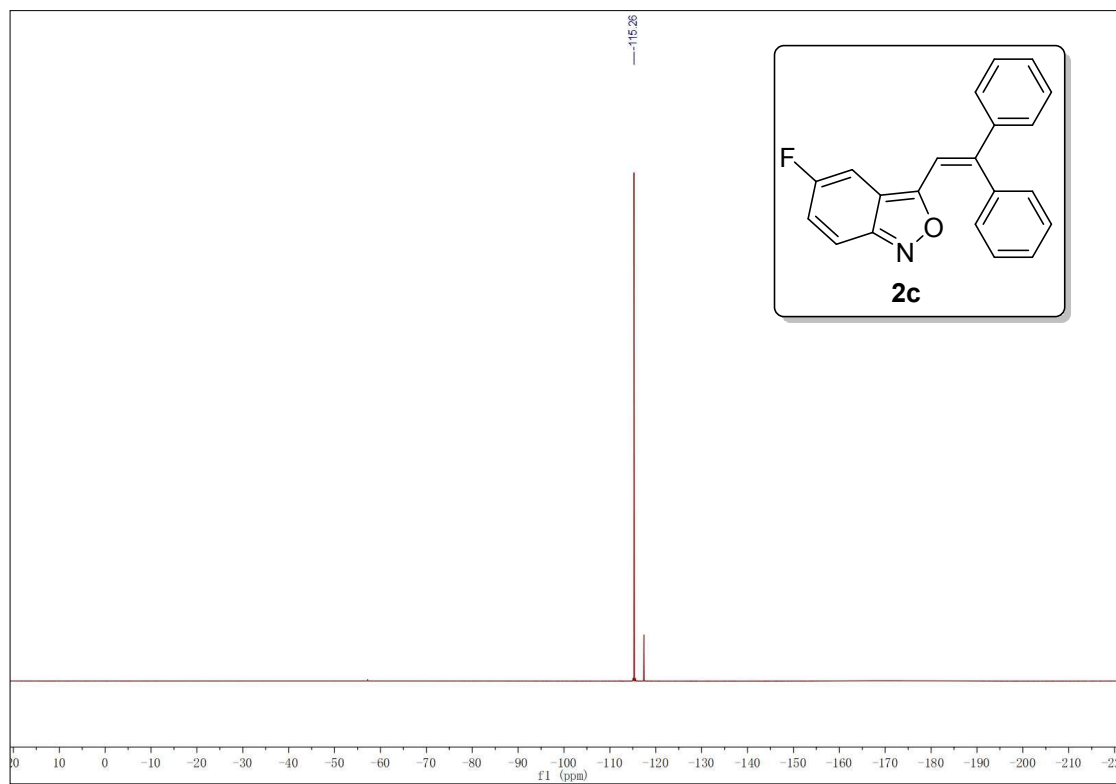

### 3-(2,2-diphenylvinyl)benzo[c]isoxazole(2d)

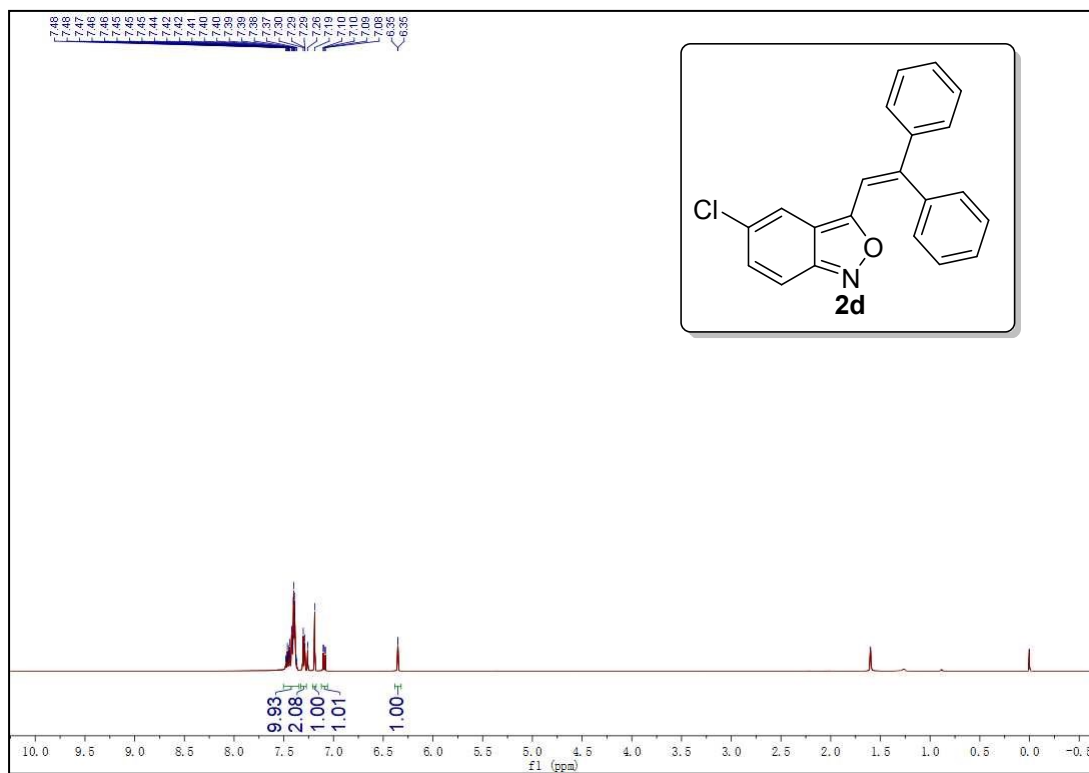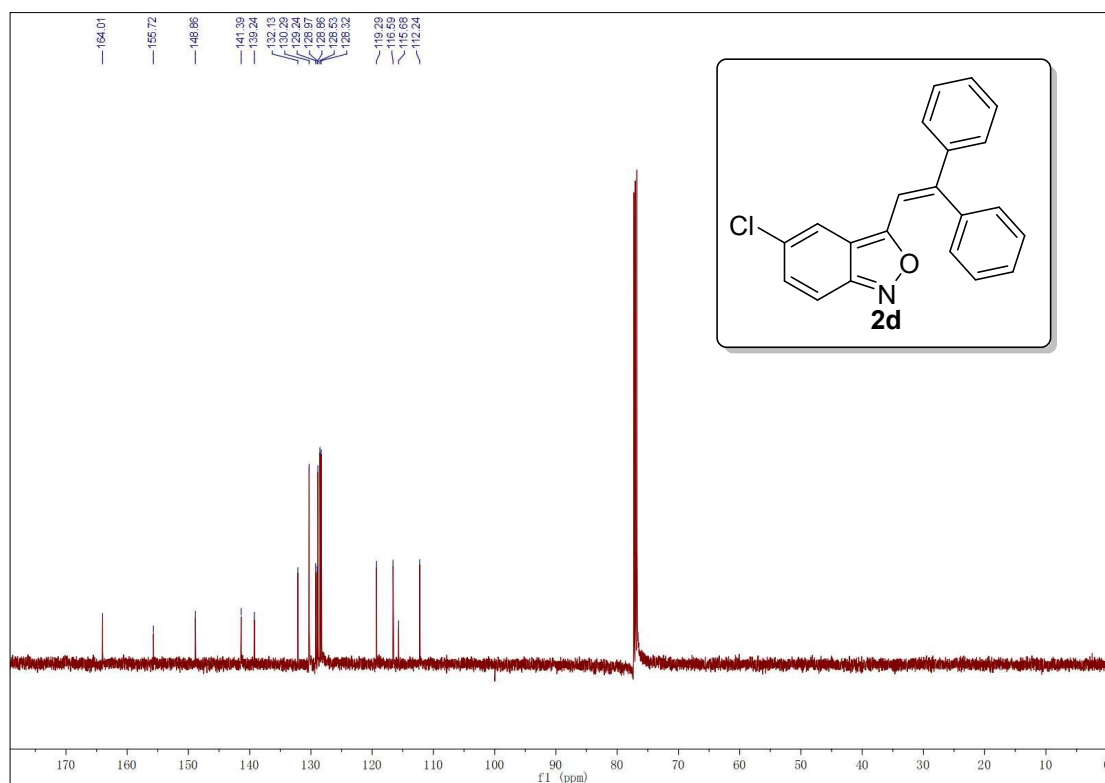

5-bromo-3-(2,2-diphenylvinyl)benzo[c]isoxazole (2e)

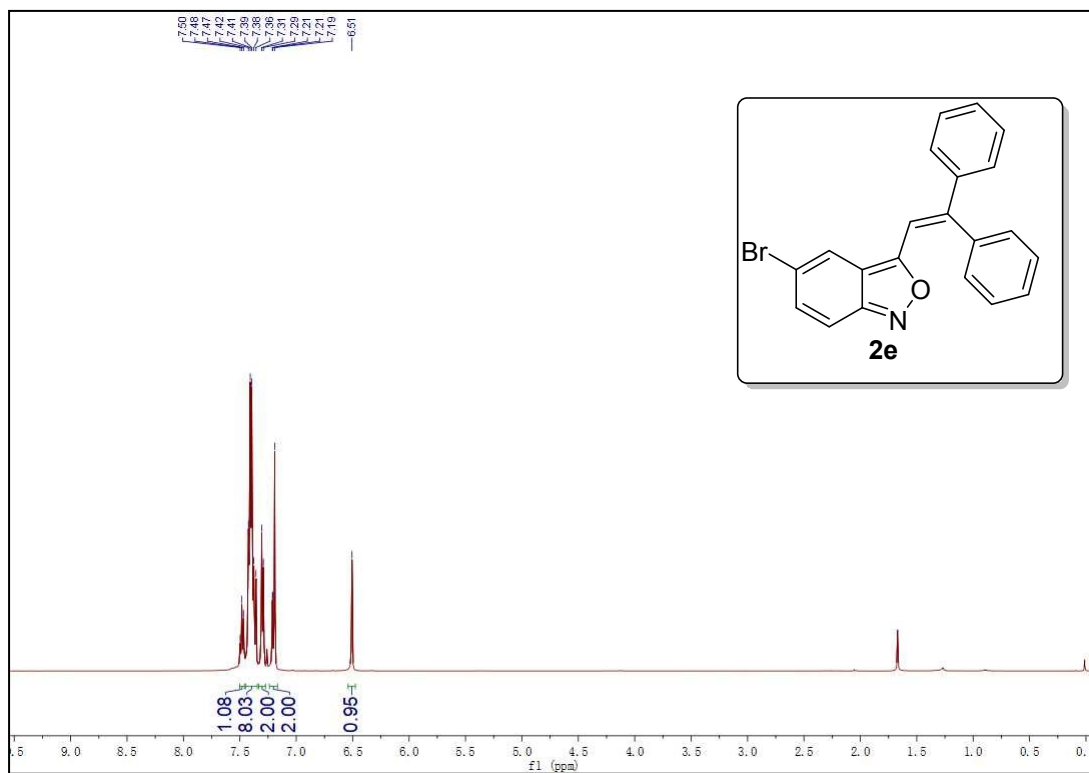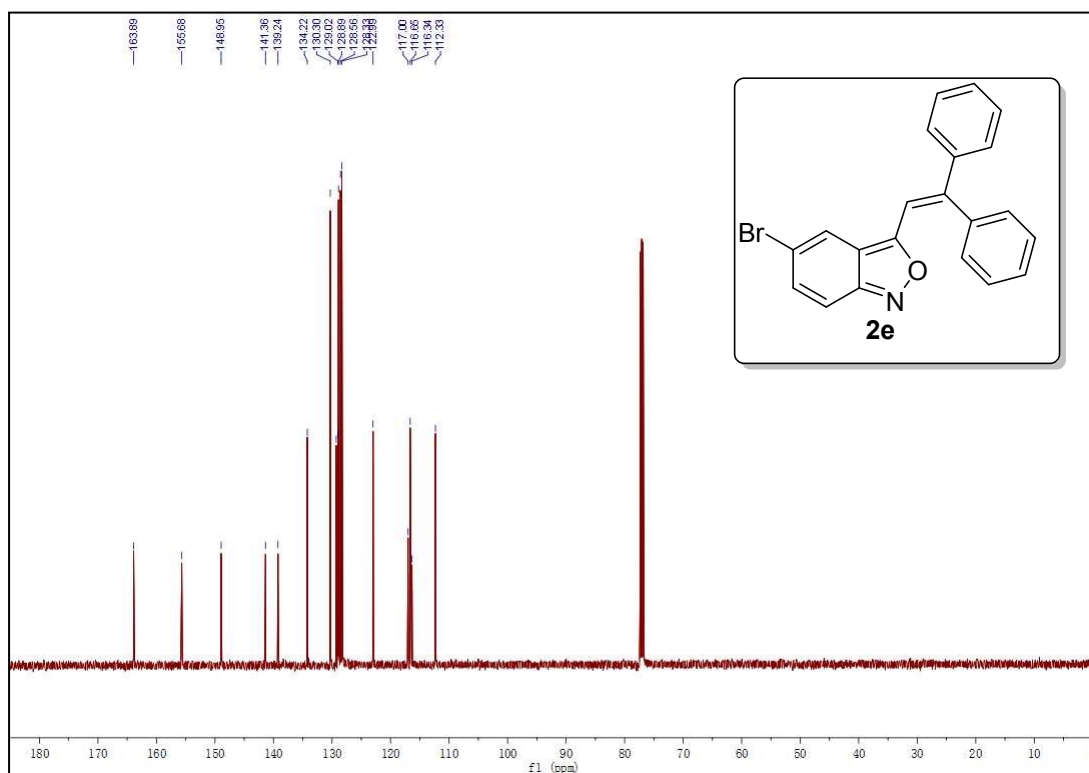

3-(2,2-diphenylvinyl)-4-fluorobenzo[c]isoxazole (2f)  
S19

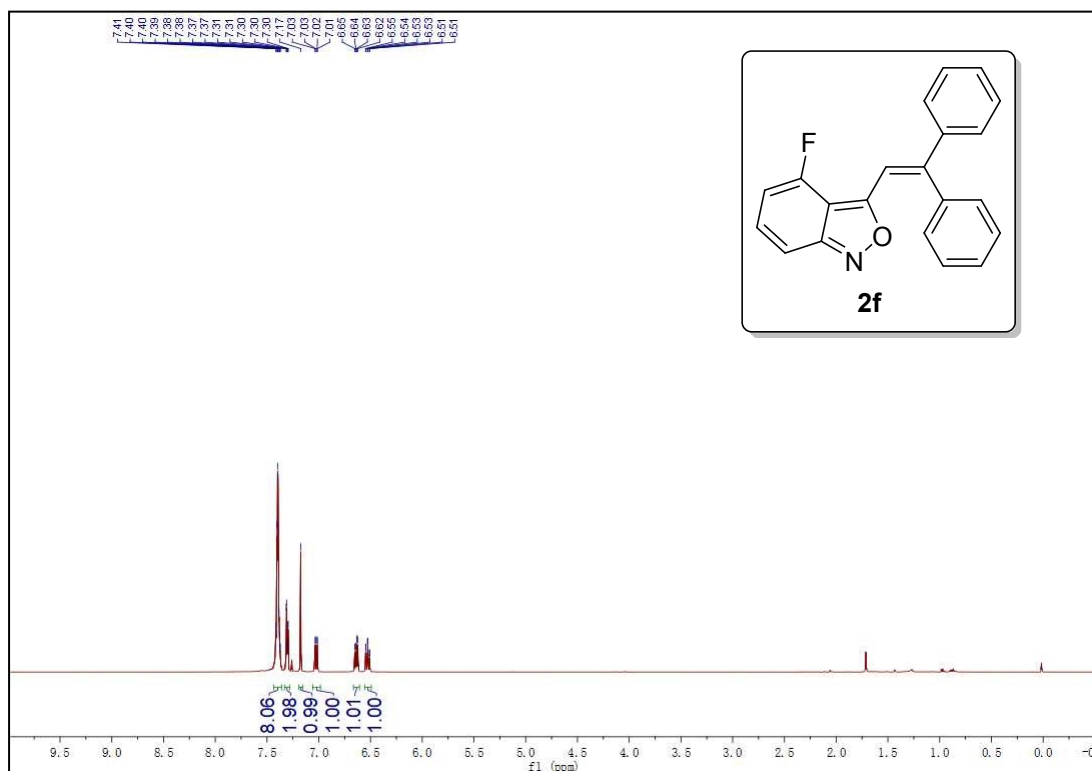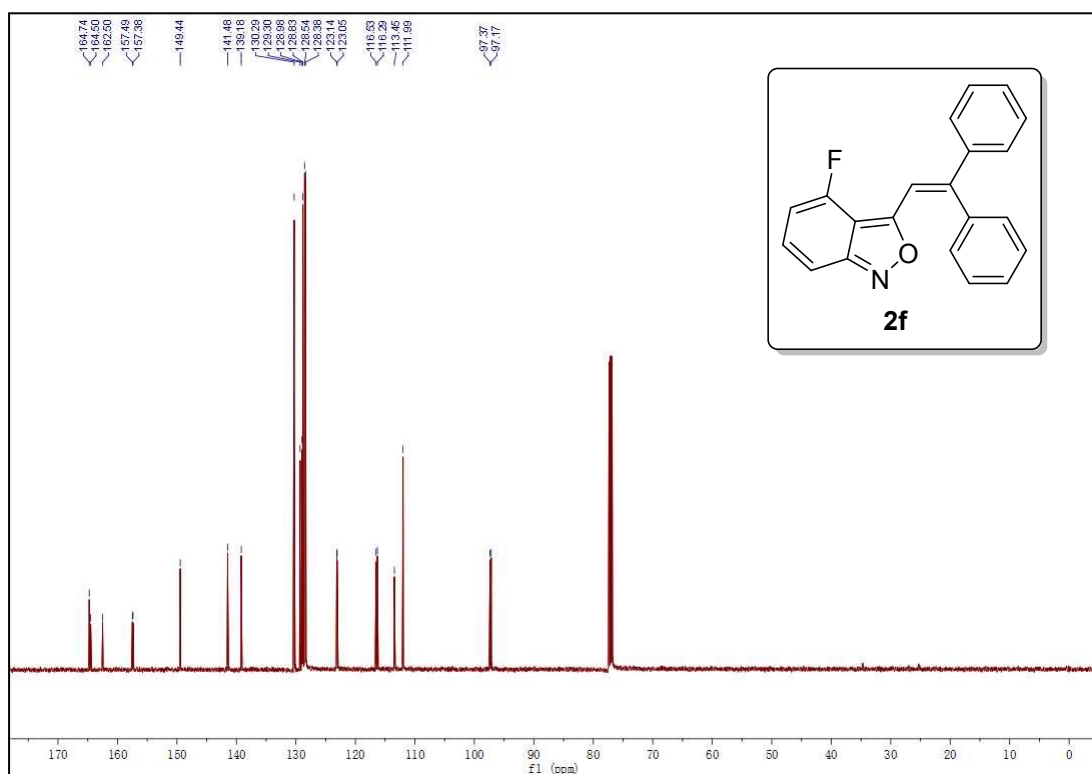

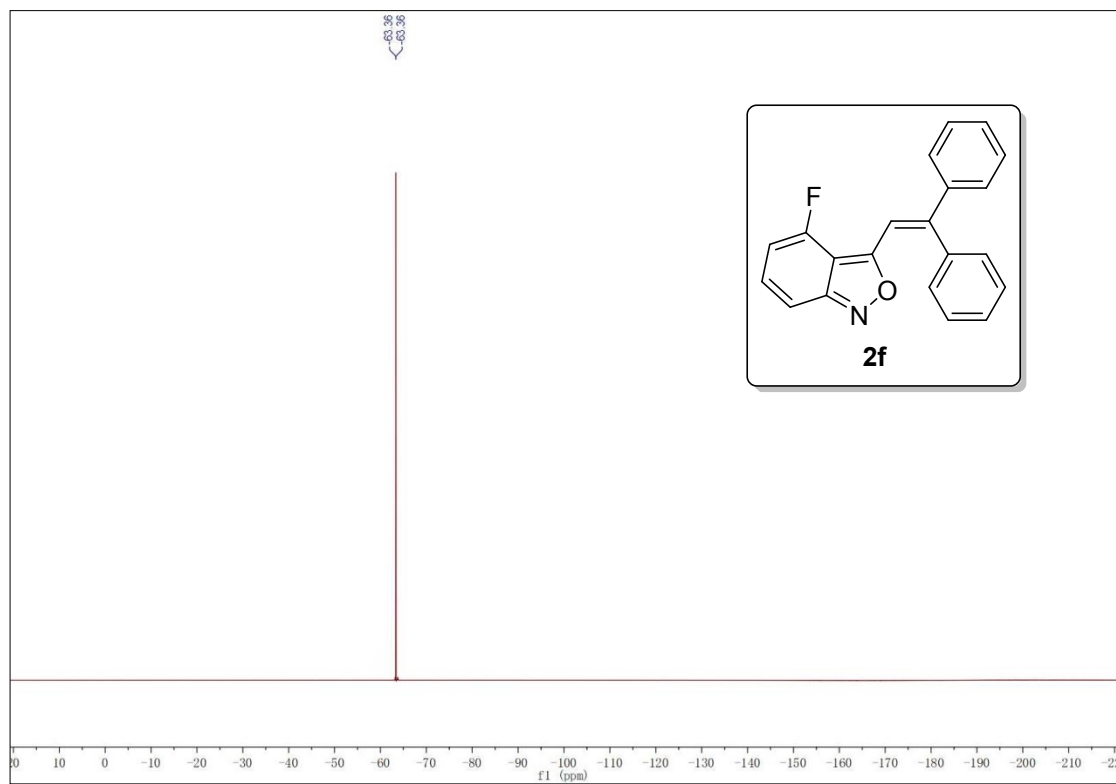

4-chloro-3-(2,2-diphenylvinyl)benzo[c]isoxazole (2g)

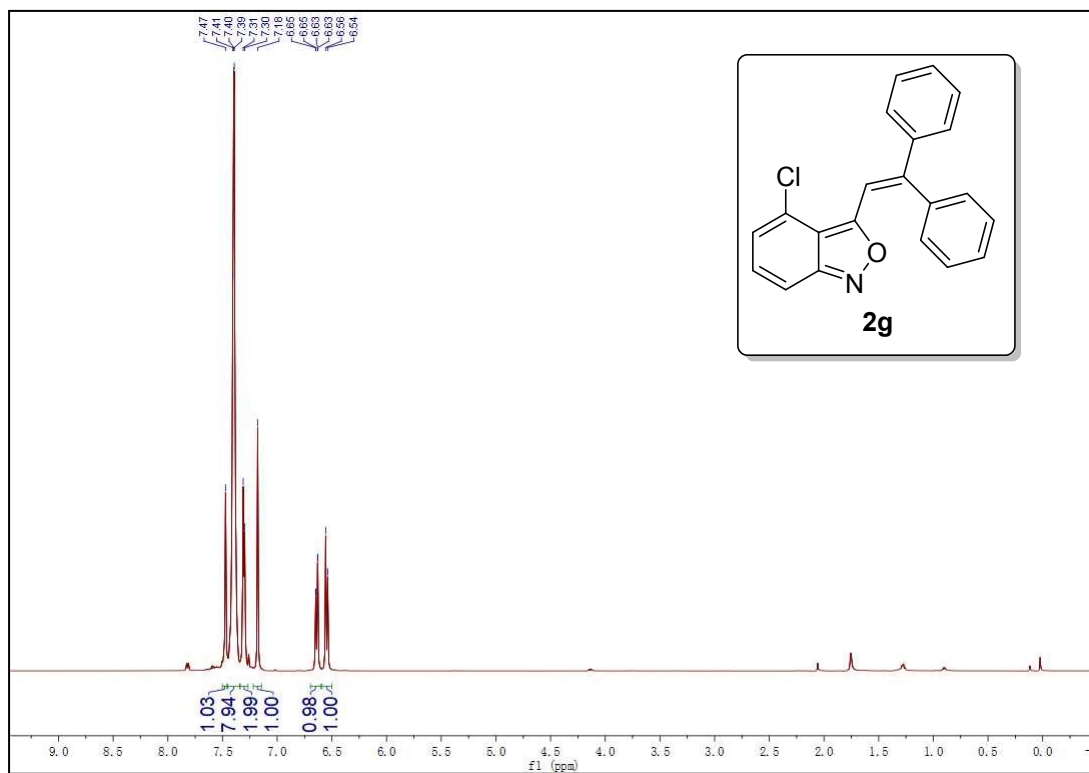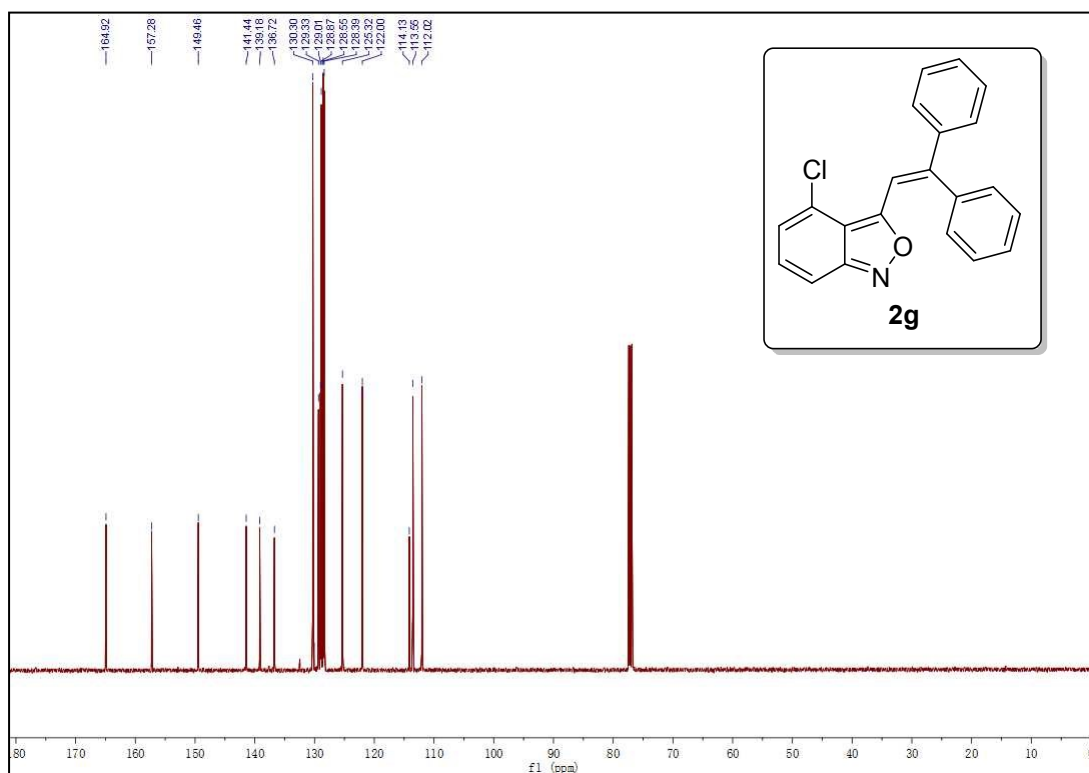

4-bromo-3-(2,2-diphenylvinyl)benzo[c]isoxazole (2h)

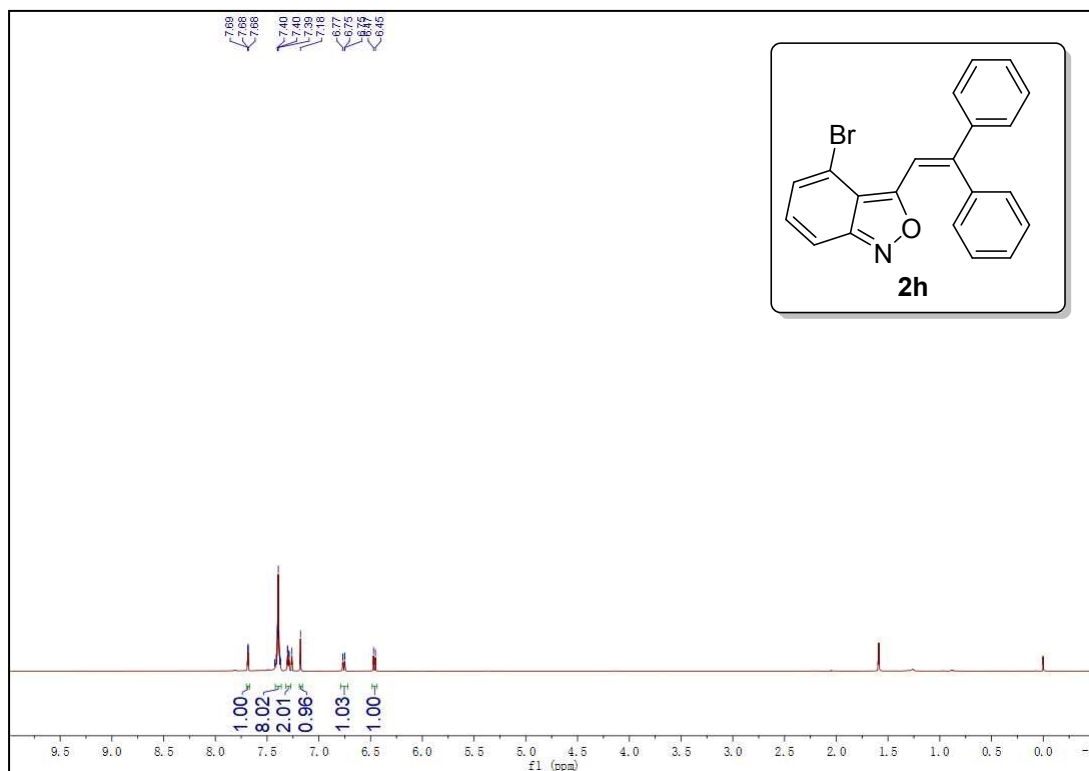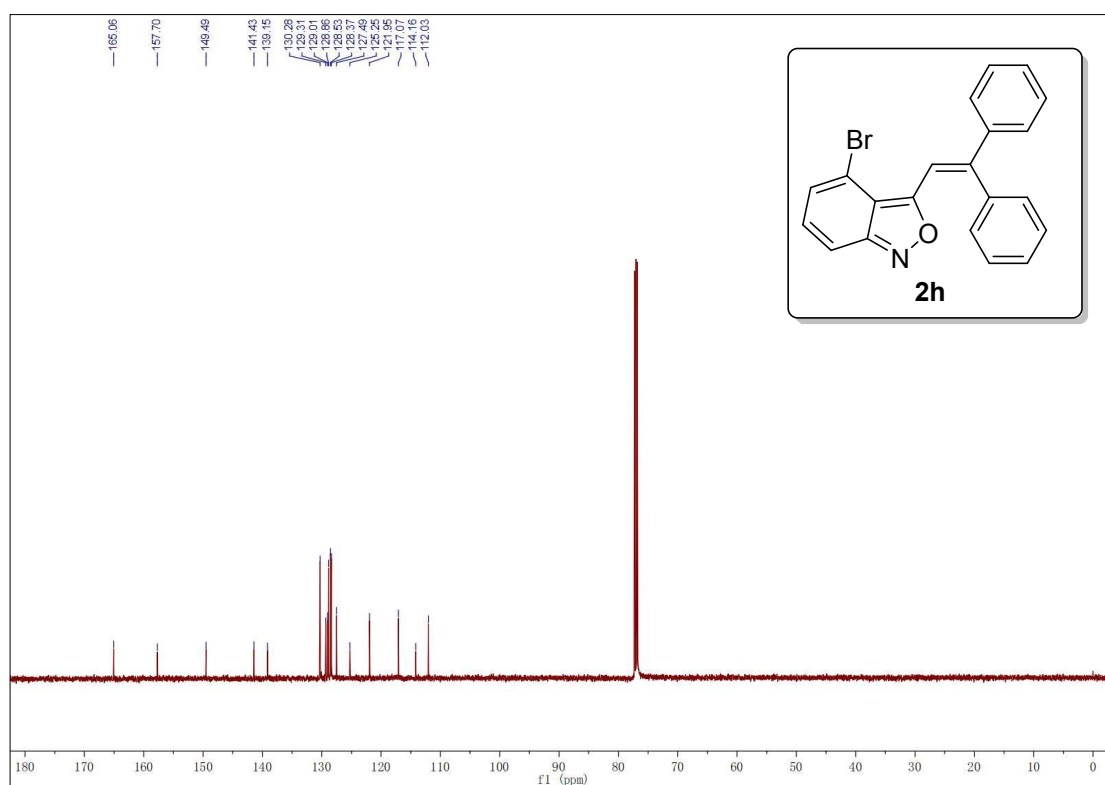

### 3-(2,2-diphenylvinyl)-5-nitrobenzo[c]isoxazole (2i)

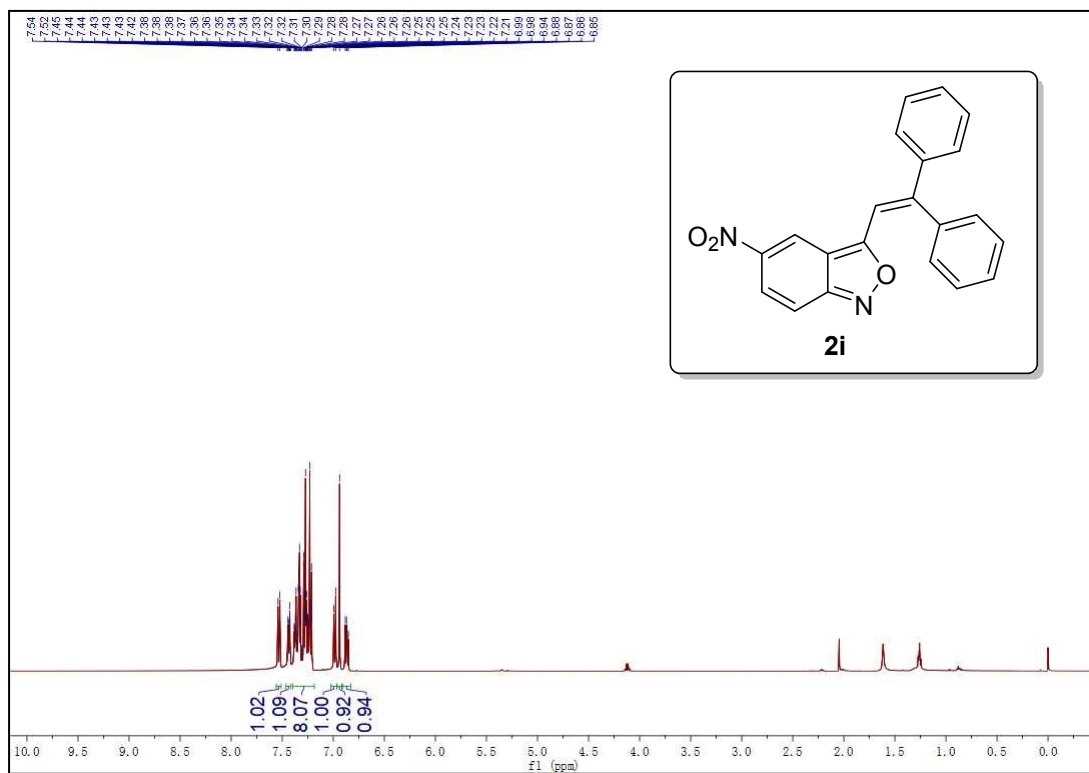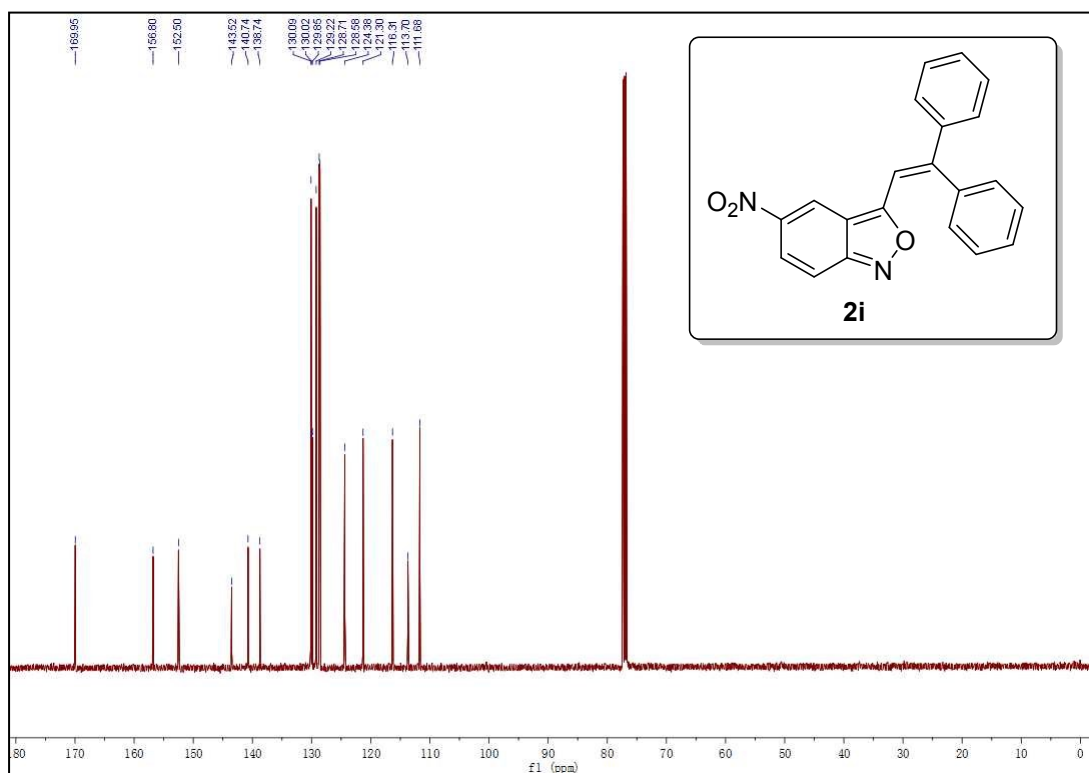



3-(2,2-diphenylvinyl)benzo[c]isoxazole-5-carbonitrile (2j)

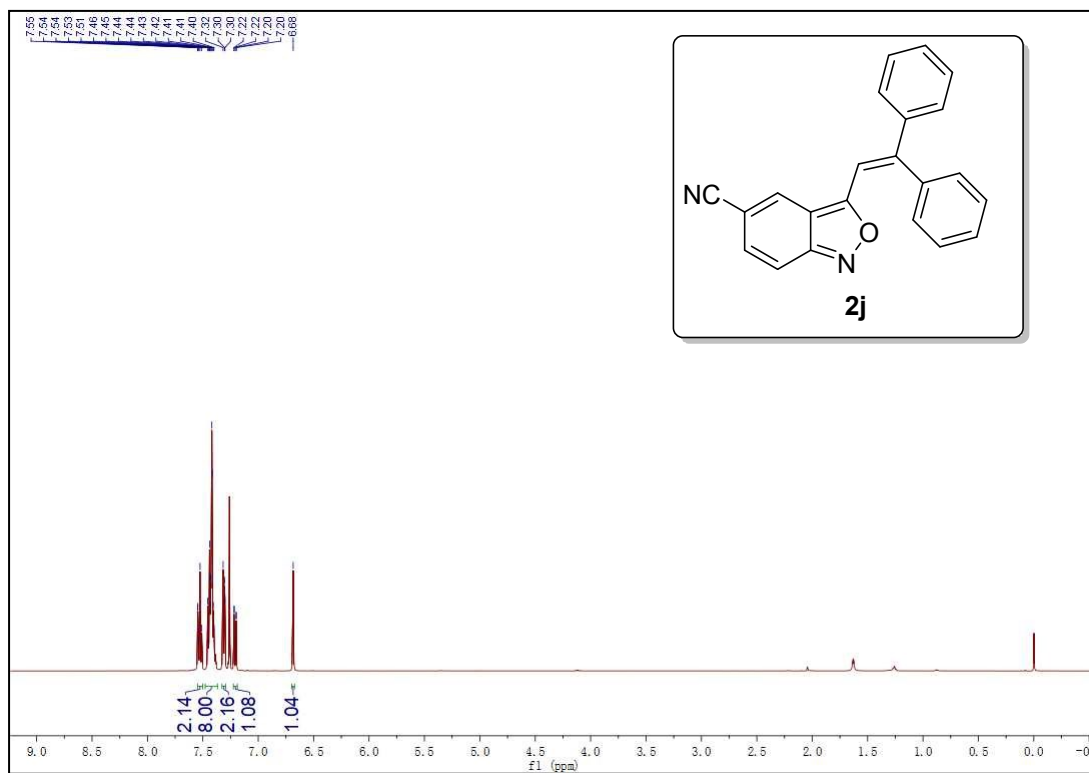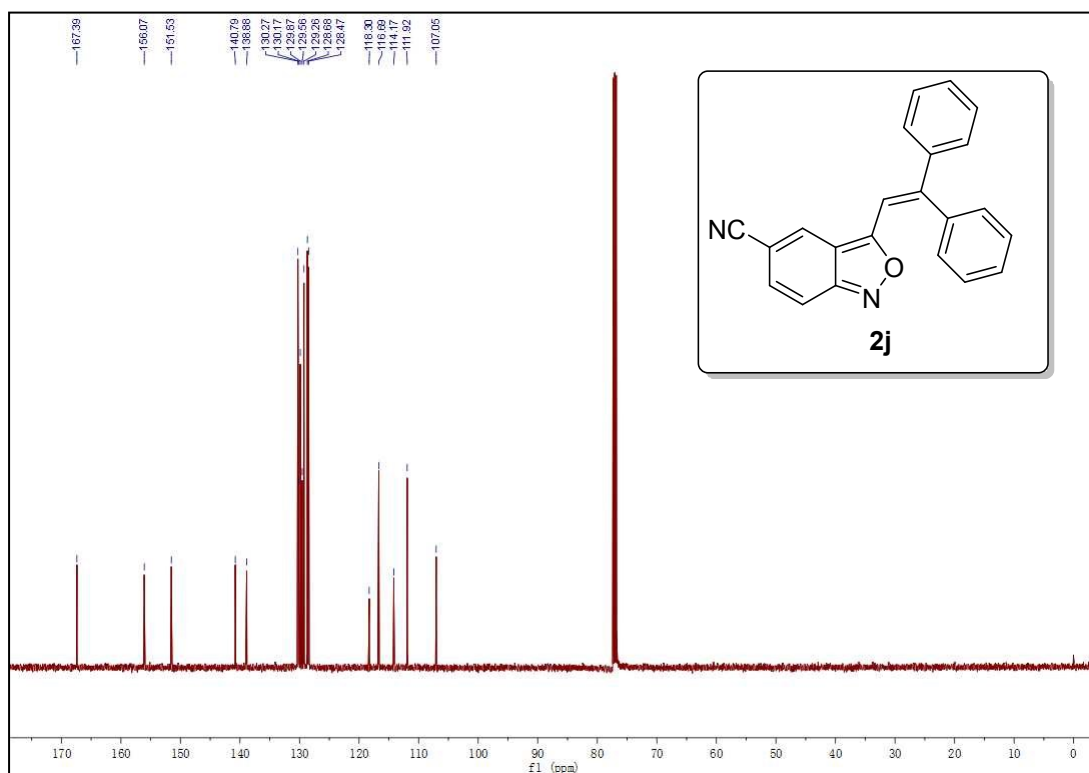

methyl 3-(2,2-diphenylvinyl)benzo[c]isoxazole-5-carboxylate (2k)

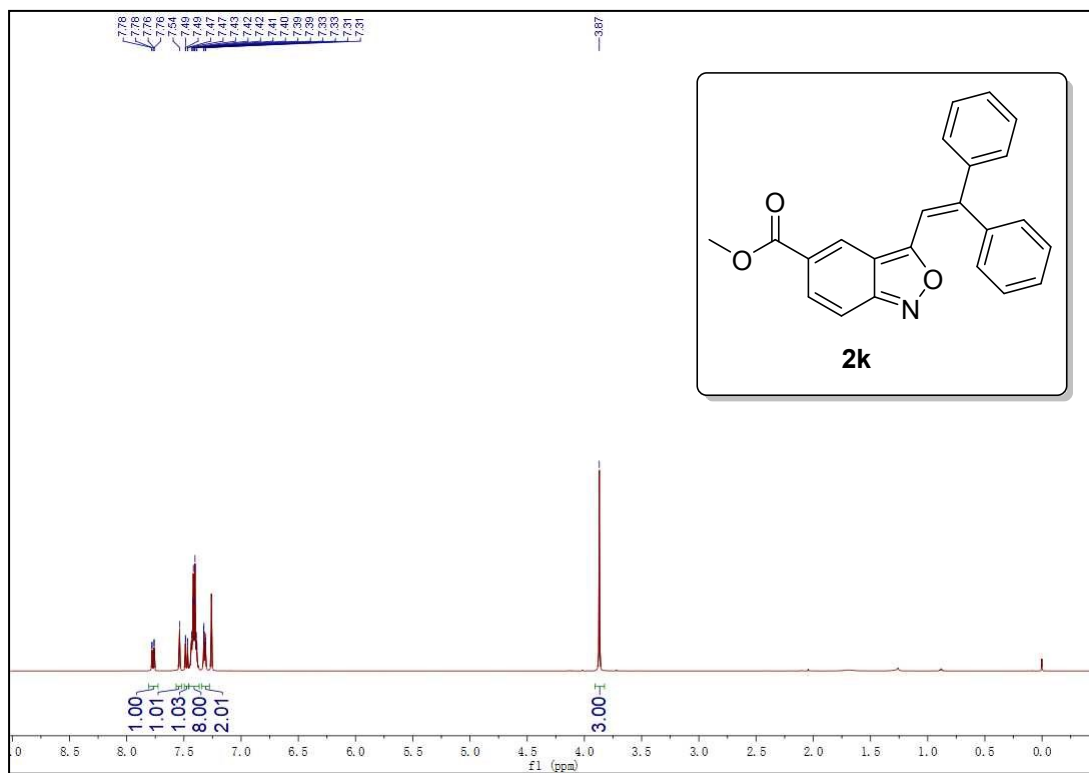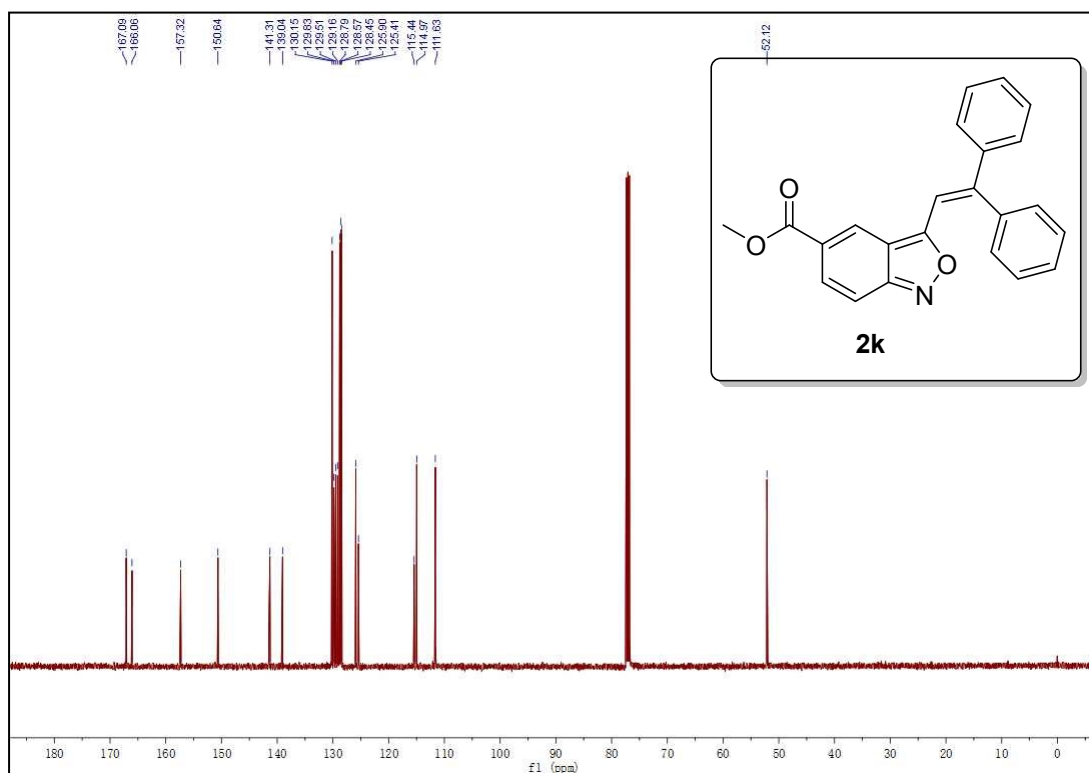

3-(2,2-diphenylvinyl)-5-(trifluoromethyl)benzo[c]isoxazole (2I)

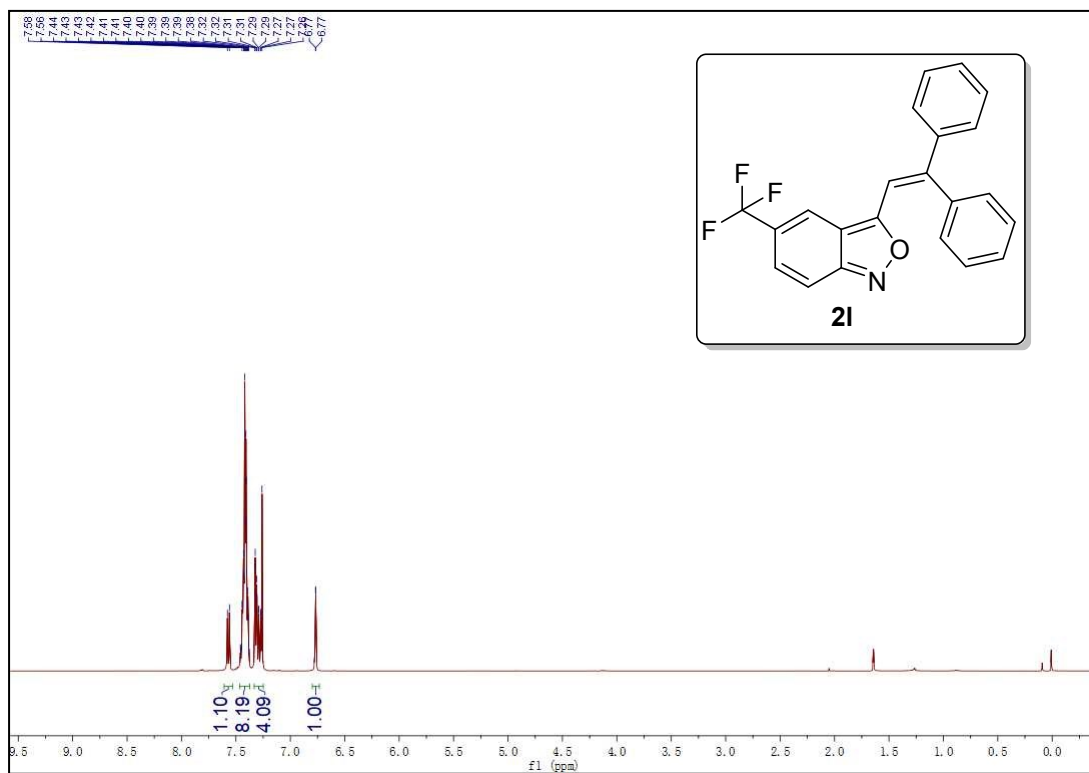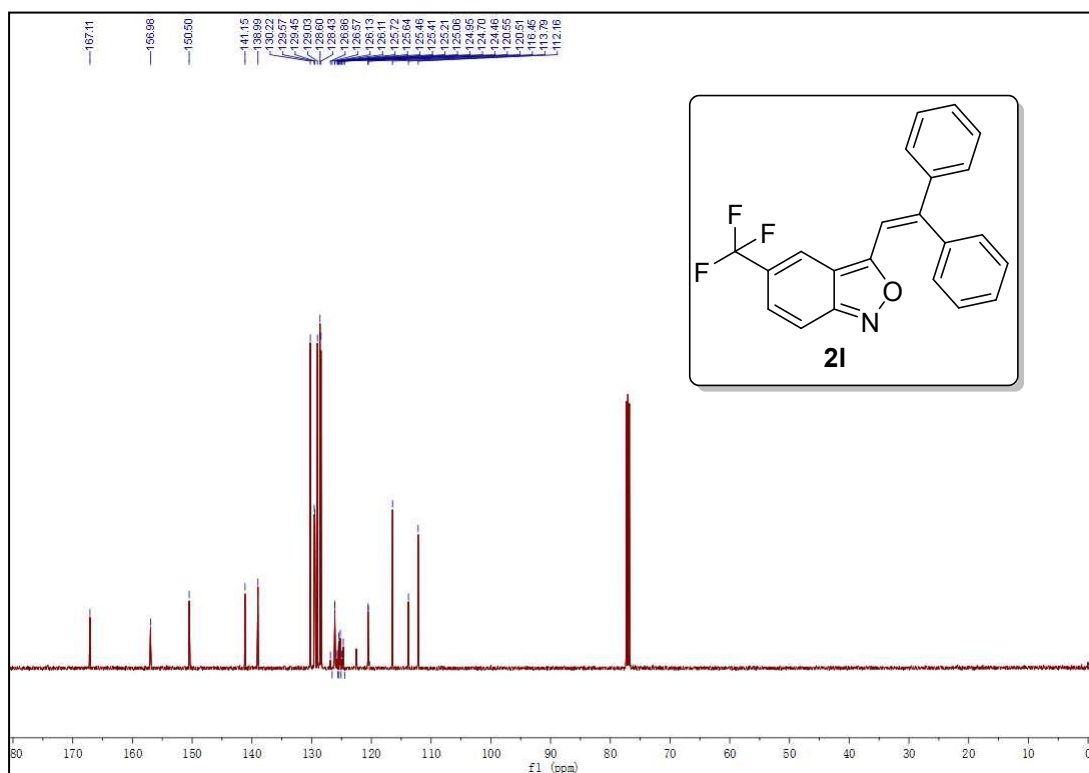

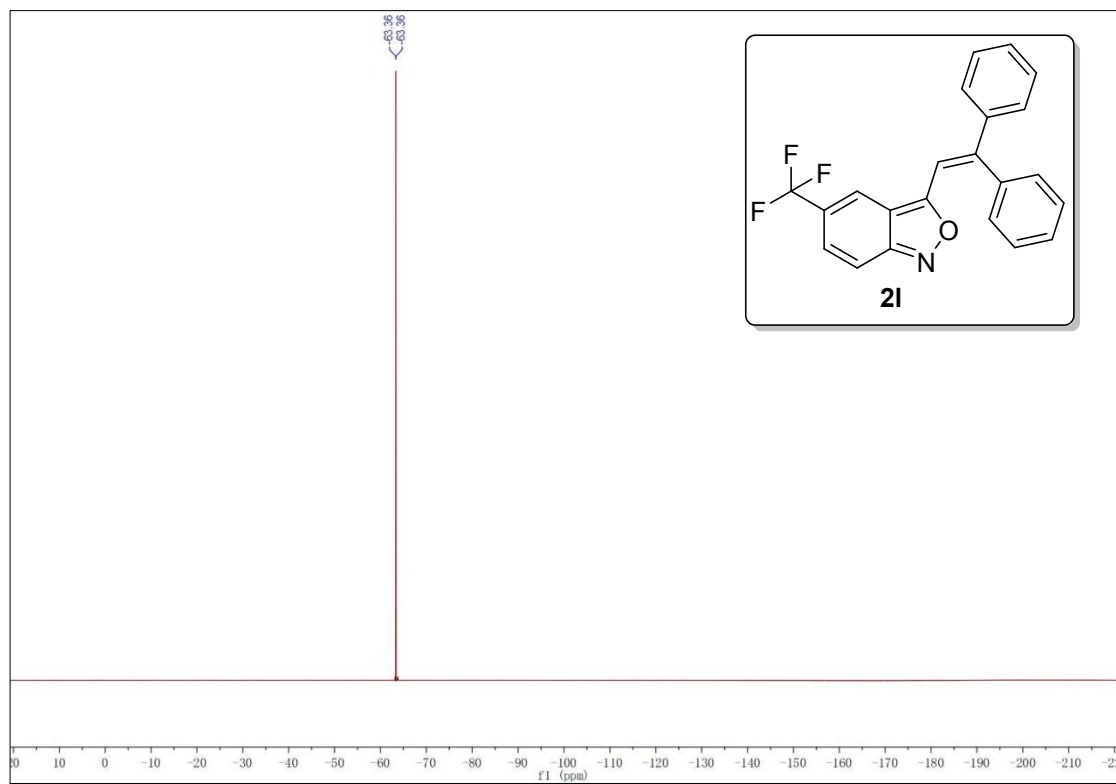

5-chloro-3-(2,2-diphenylvinyl)-7-fluorobenzo[c]isoxazole (2m)

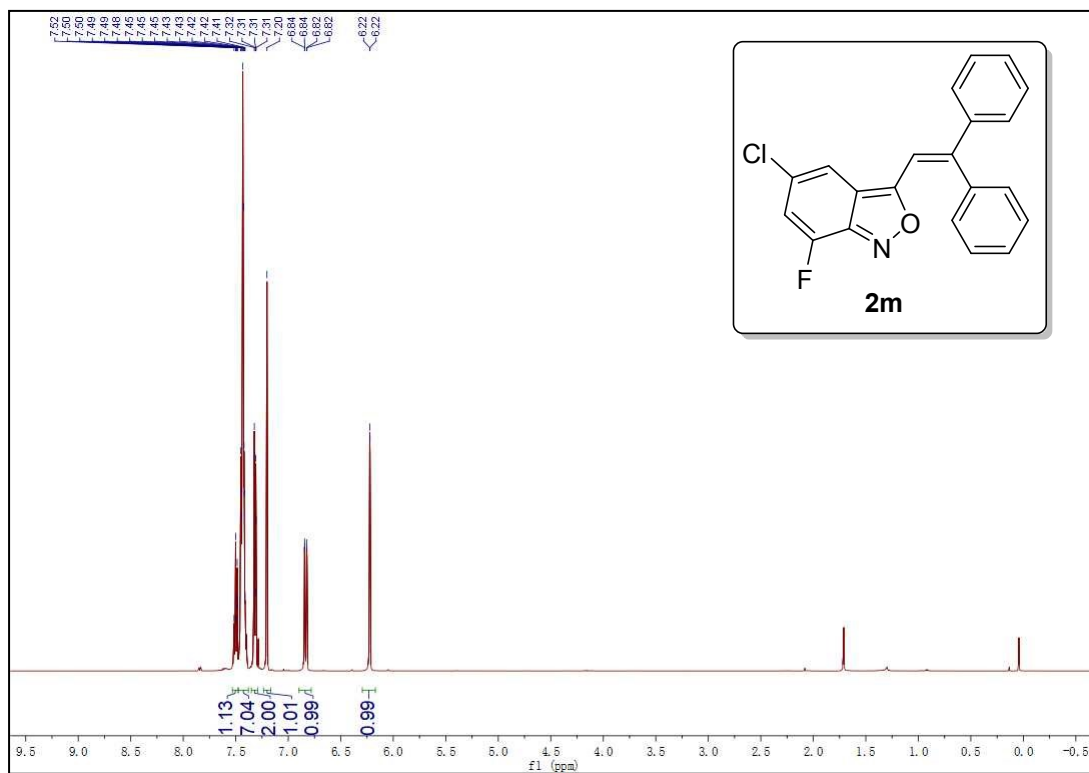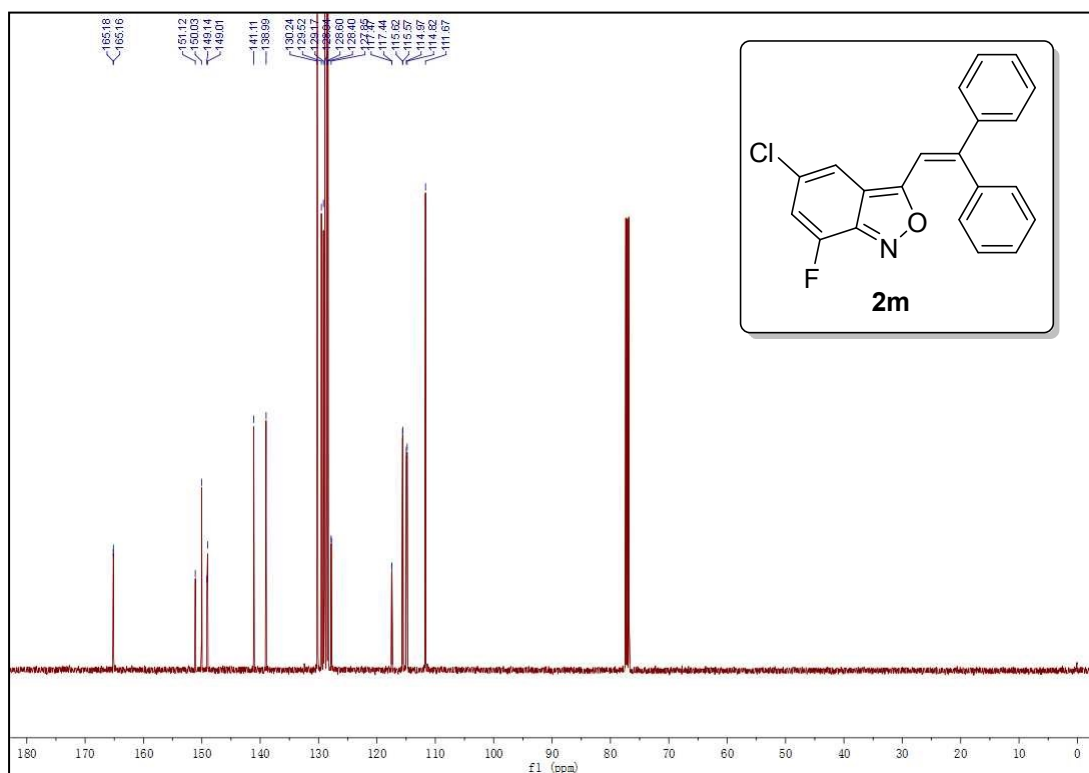

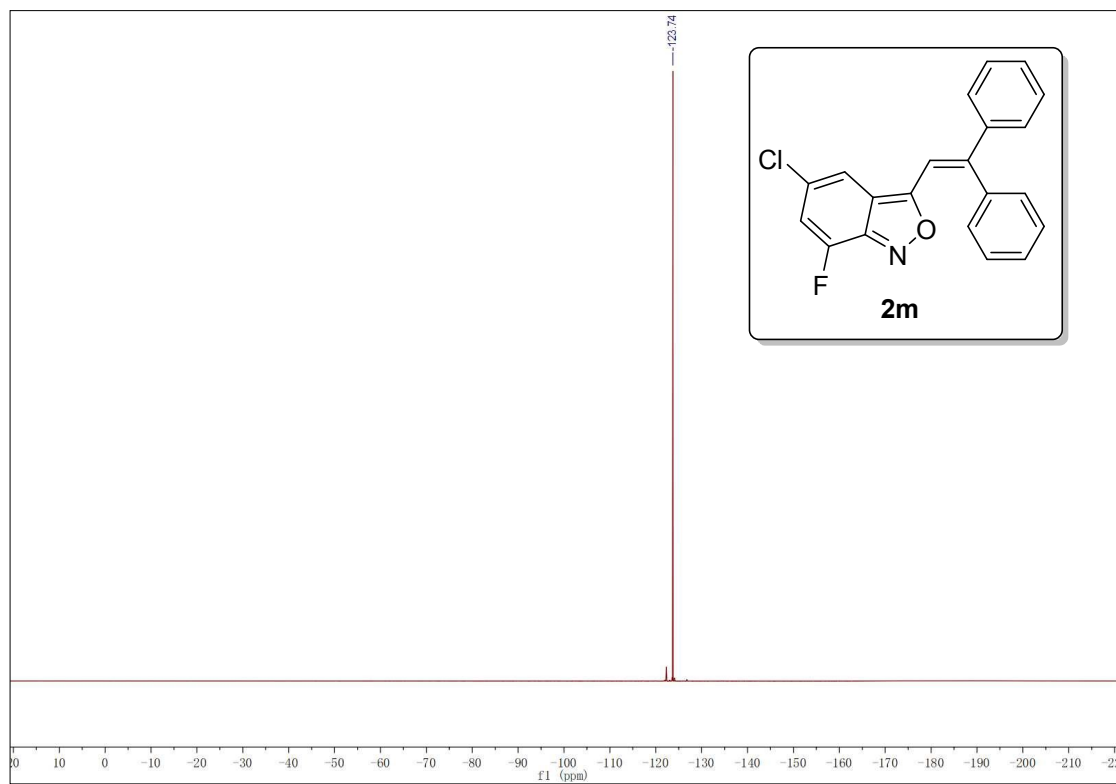

4-chloro-3-(2,2-diphenylvinyl)-5-fluorobenzo[c]isoxazole (2n)

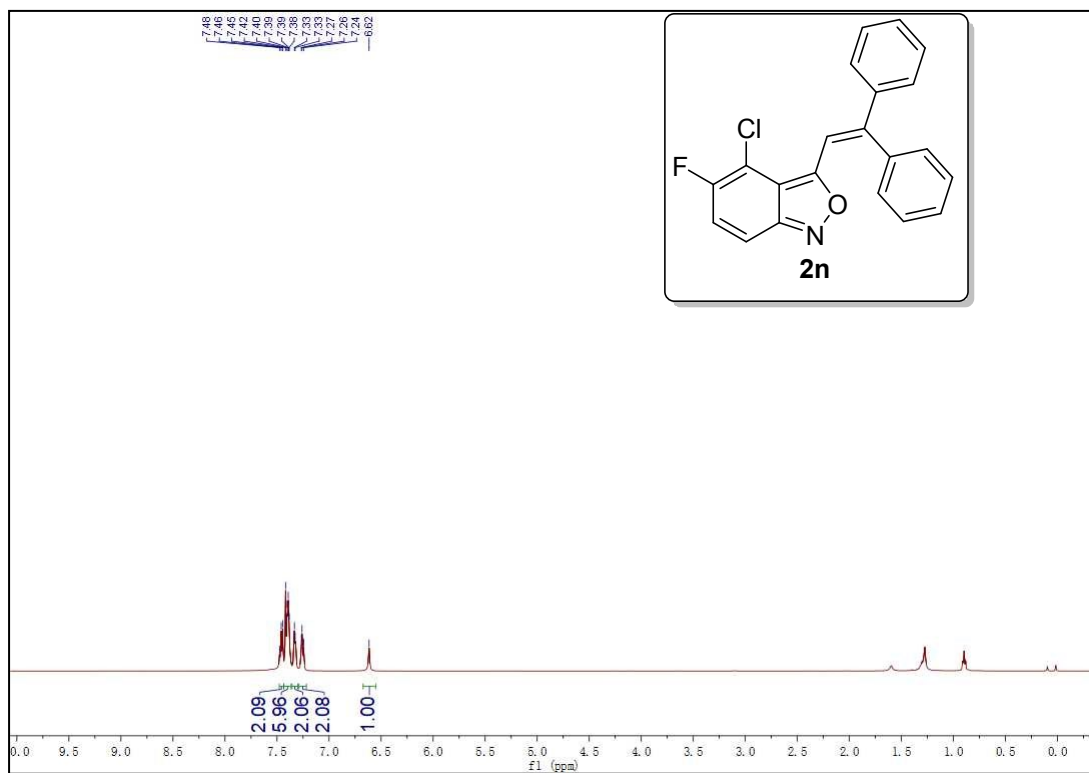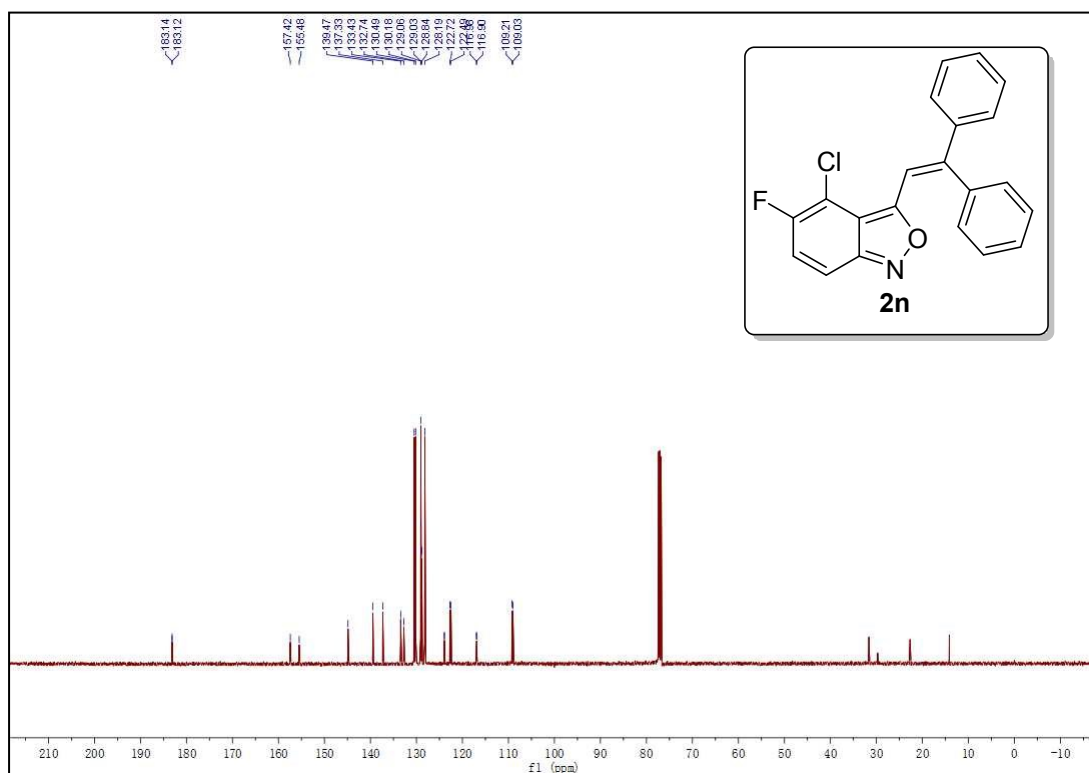

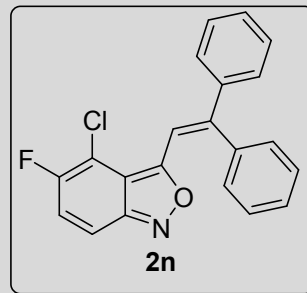



3-(2,2-diphenylvinyl)-5-ethyl-7-iodobenzo[c]isoxazole (2o)

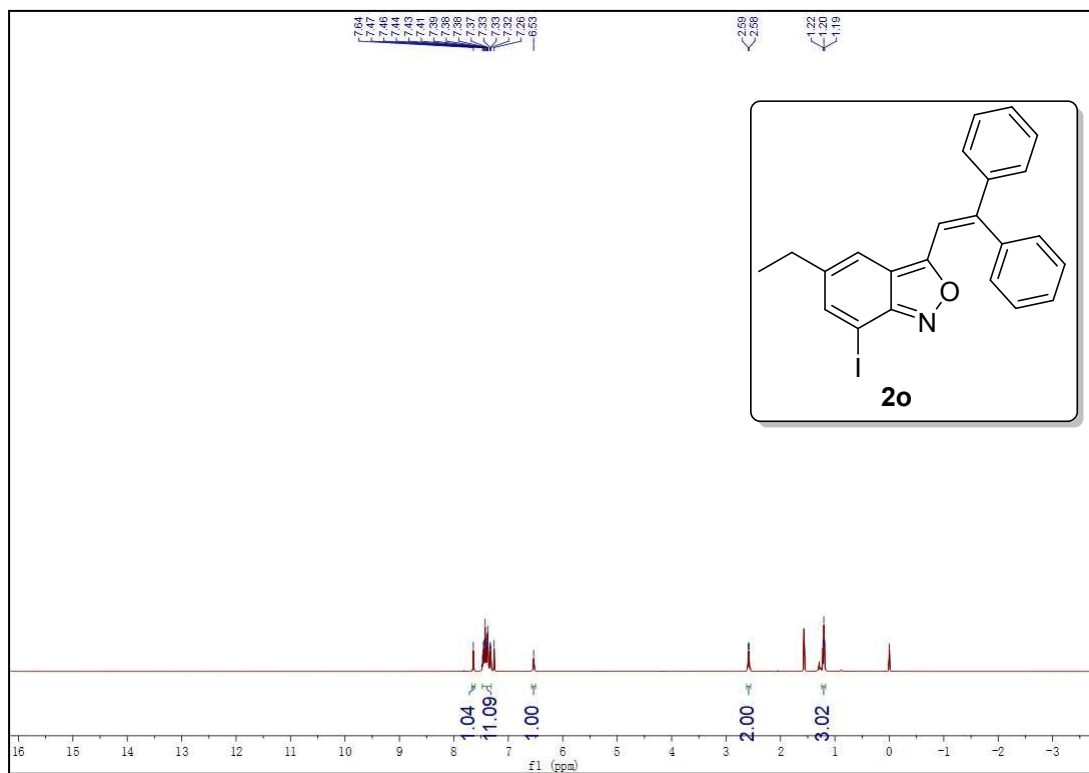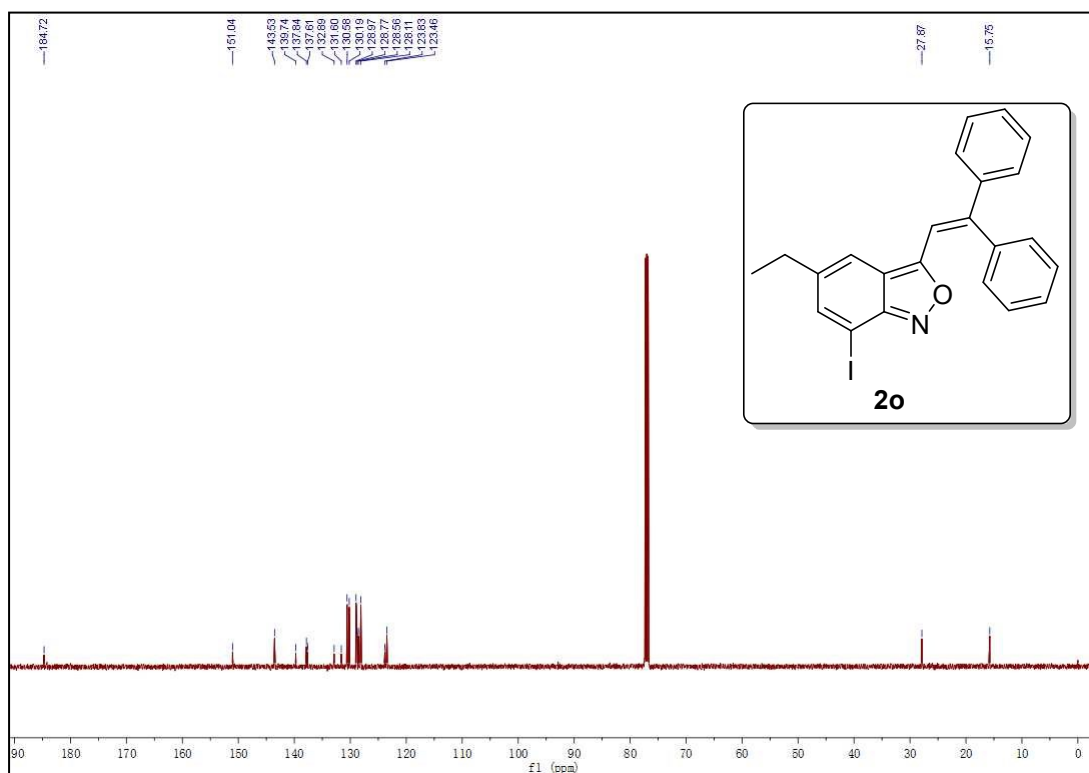

3-(2,2-diphenylvinyl)-7-iodo-5-isopropylbenzo[c]isoxazole (2p)

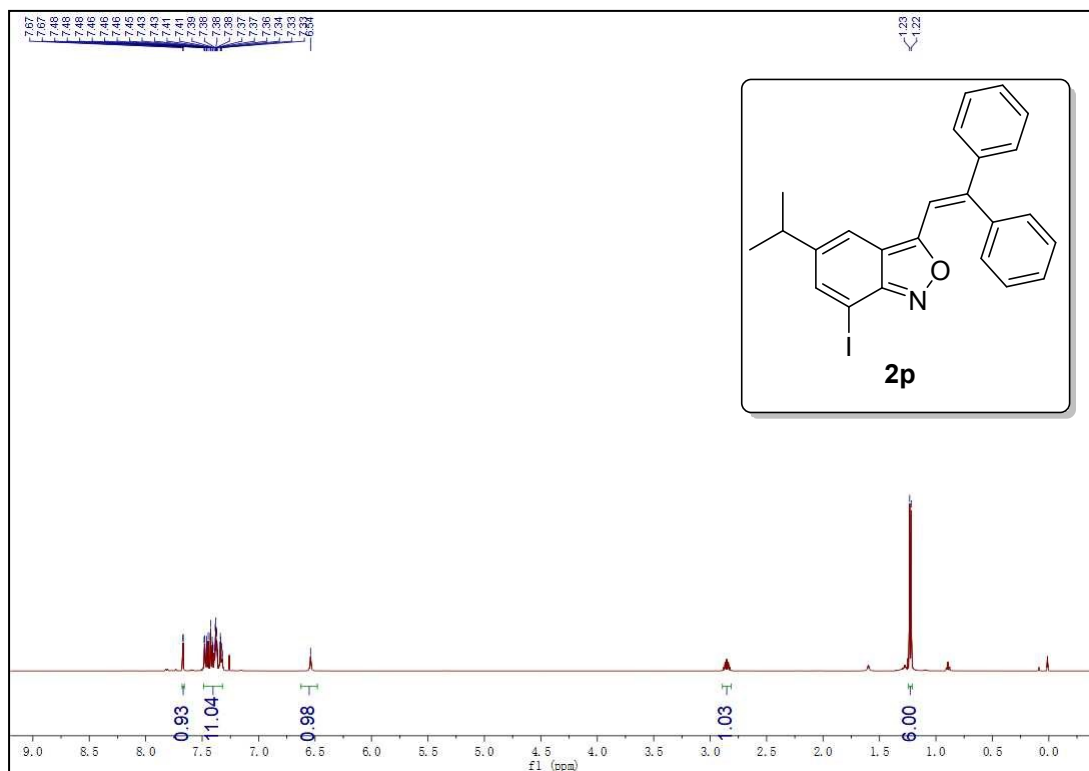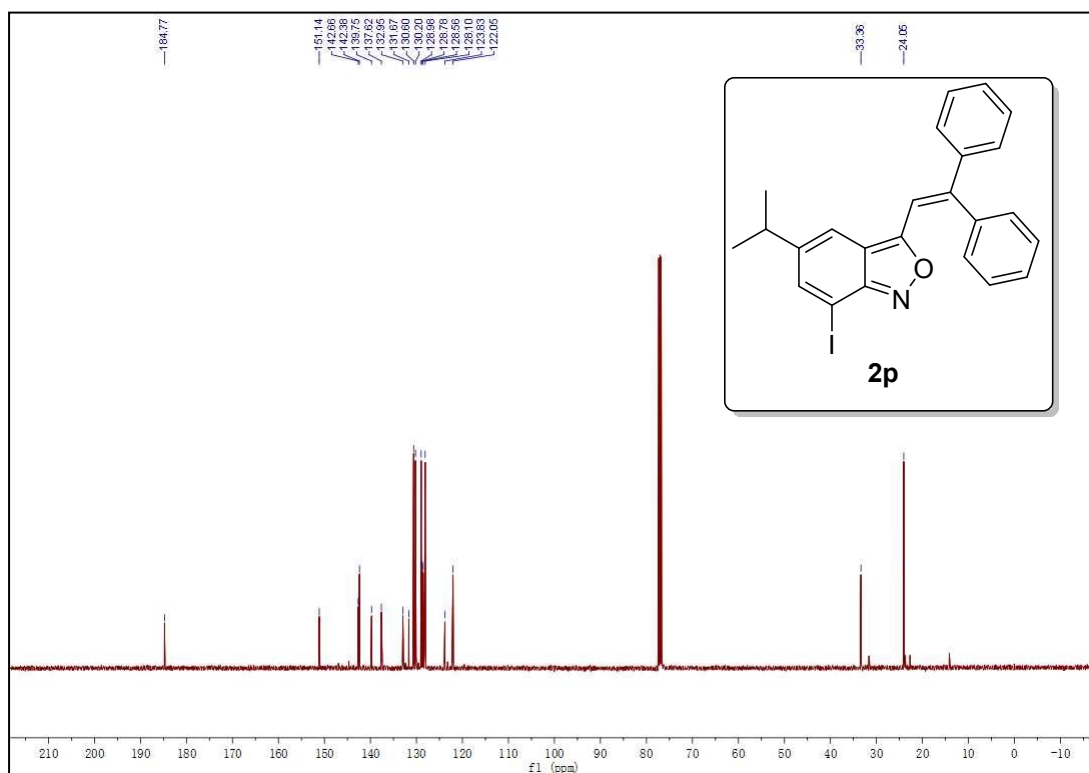

5-(tert-butyl)-3-(2,2-diphenylvinyl)-7-iodobenzo[c]isoxazole (2q)

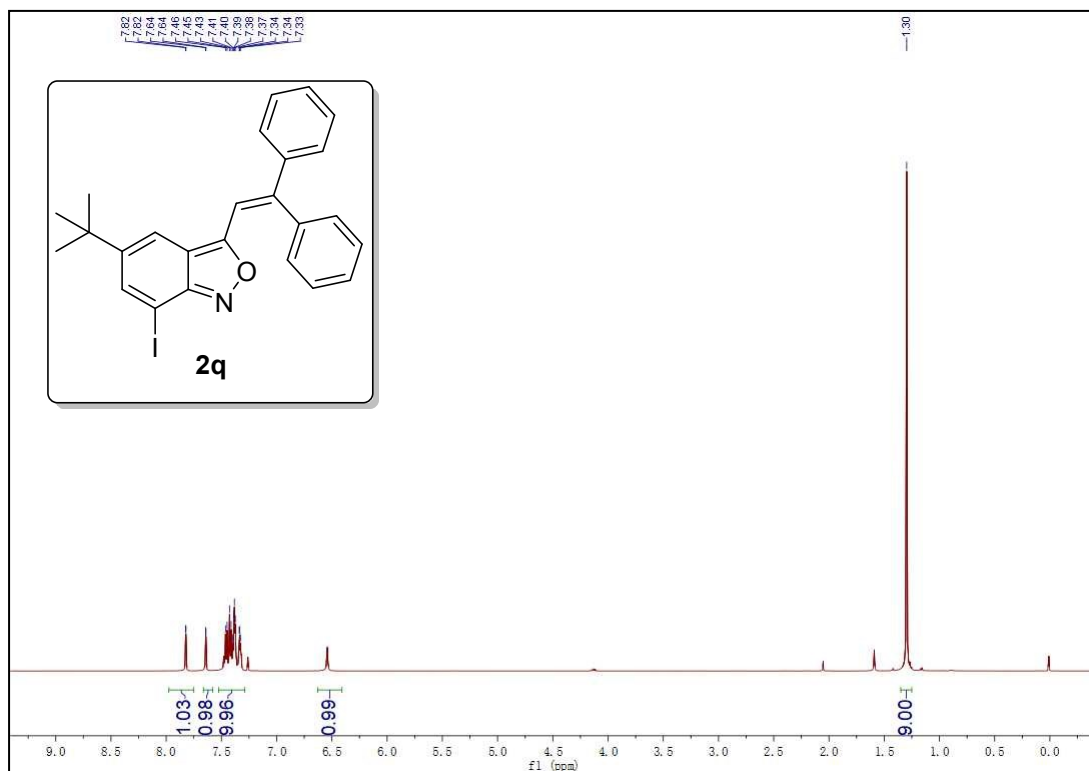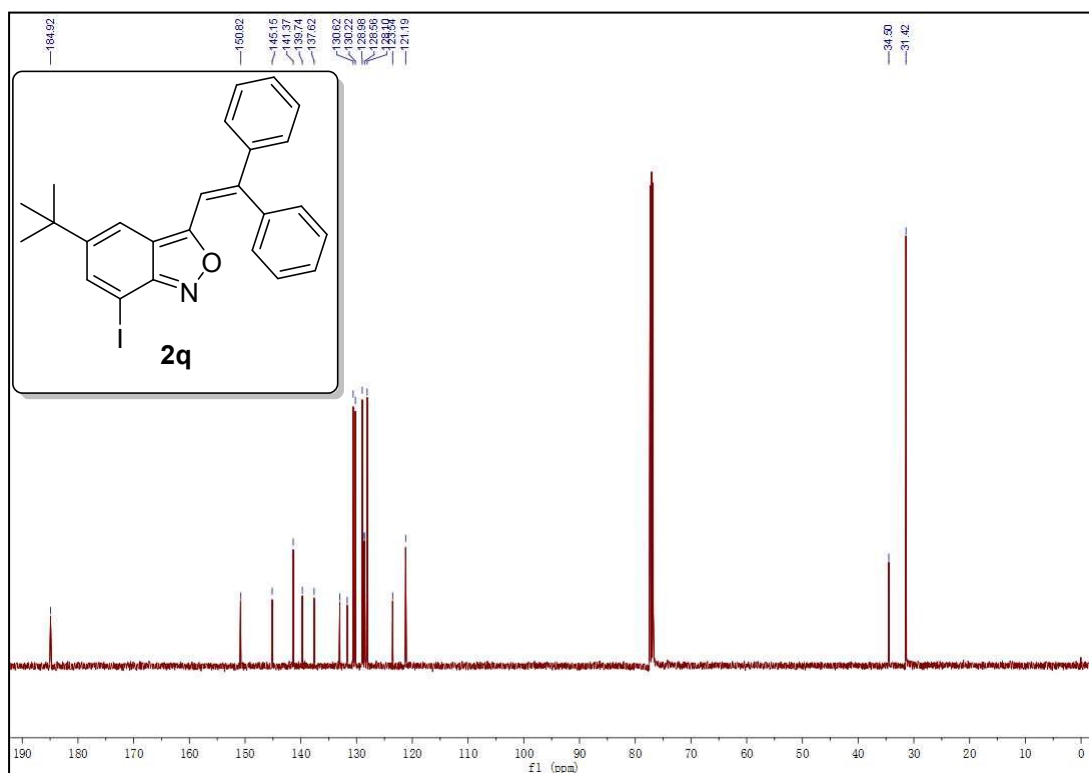

3-(2,2-di-p-tolylvinyl)benzo[c]isoxazole (2r)

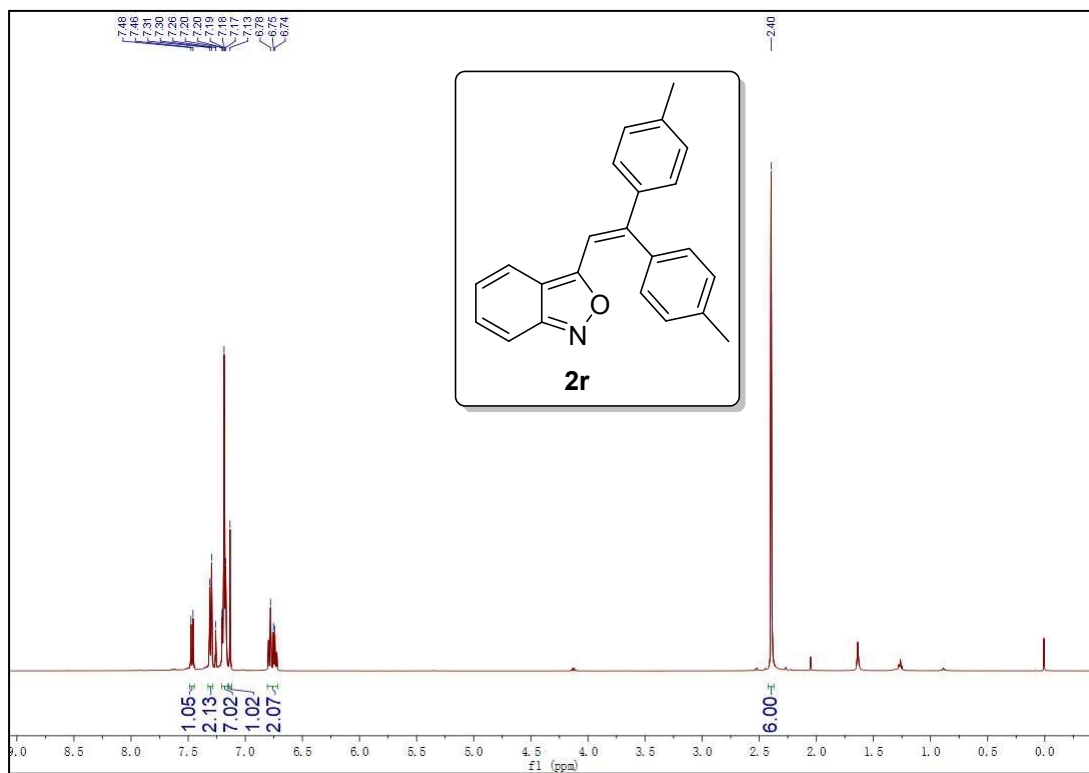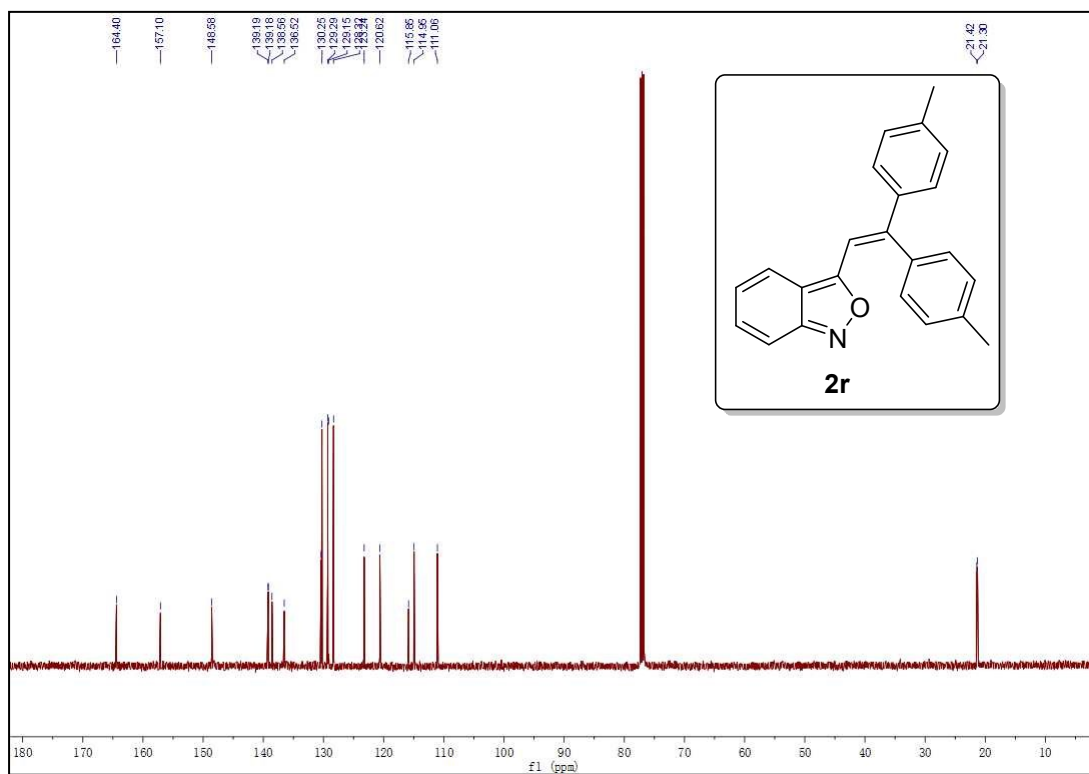

3-(2,2-bis(3,5-dimethylphenyl)vinyl)benzo[c]isoxazole (2s)

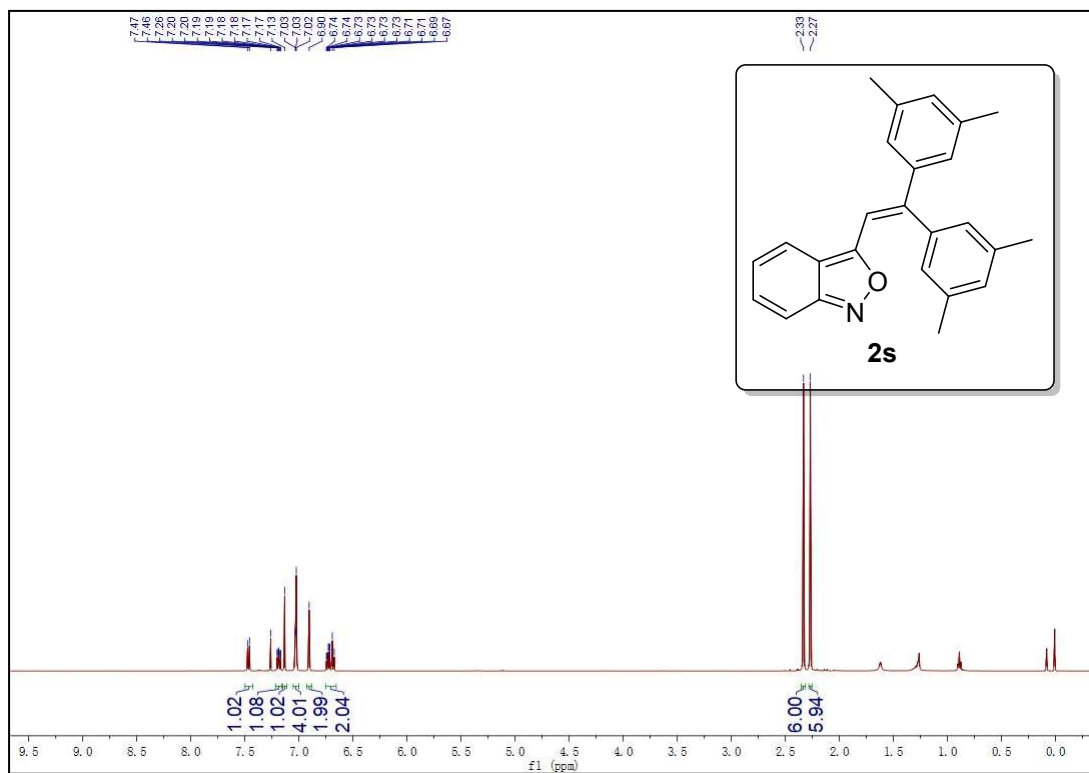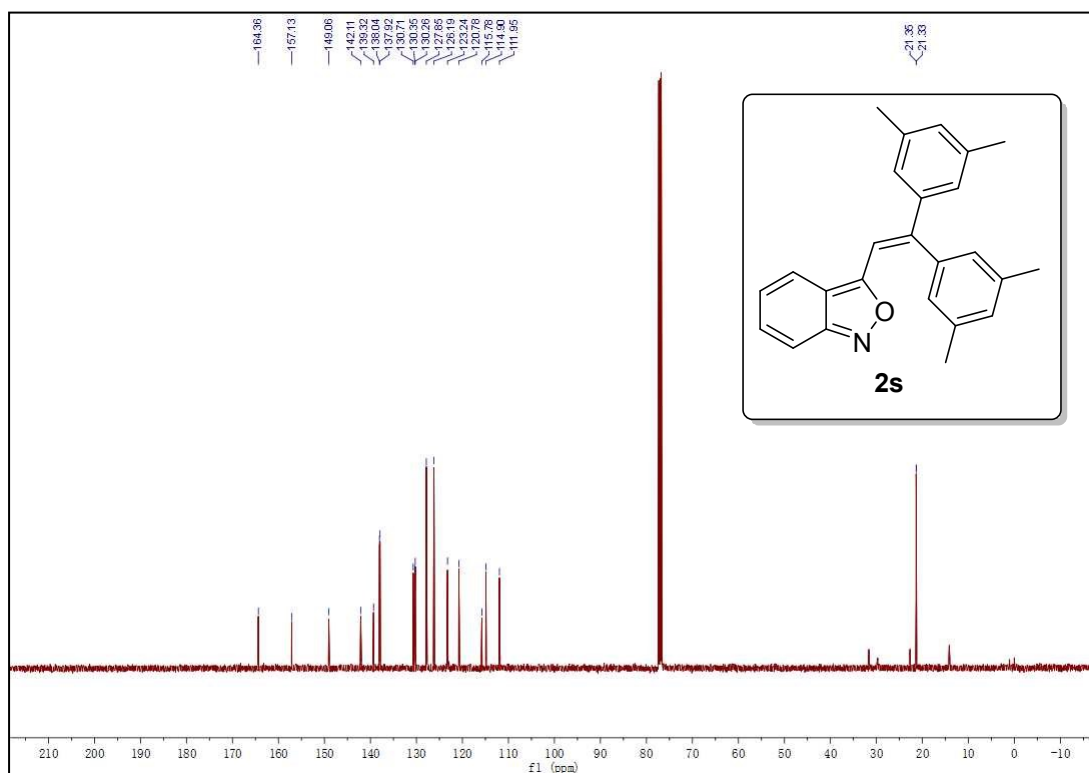

3-(2,2-bis(4-fluorophenyl)viny)benzo[c]isoxazole (2t)

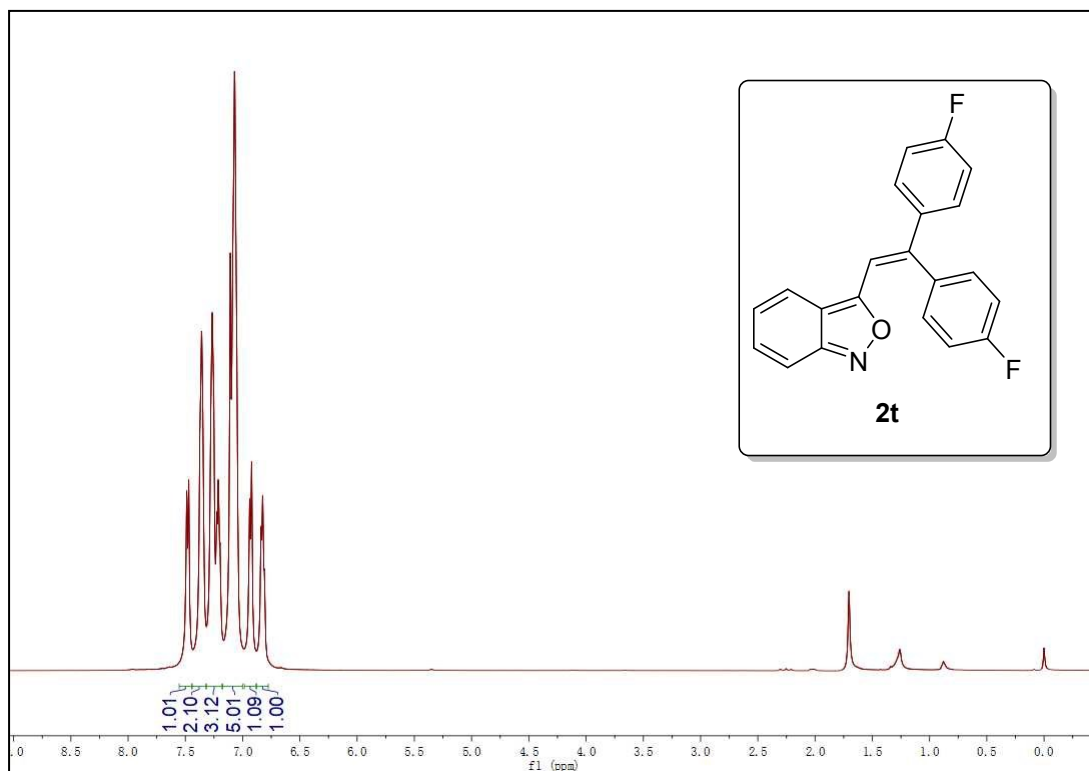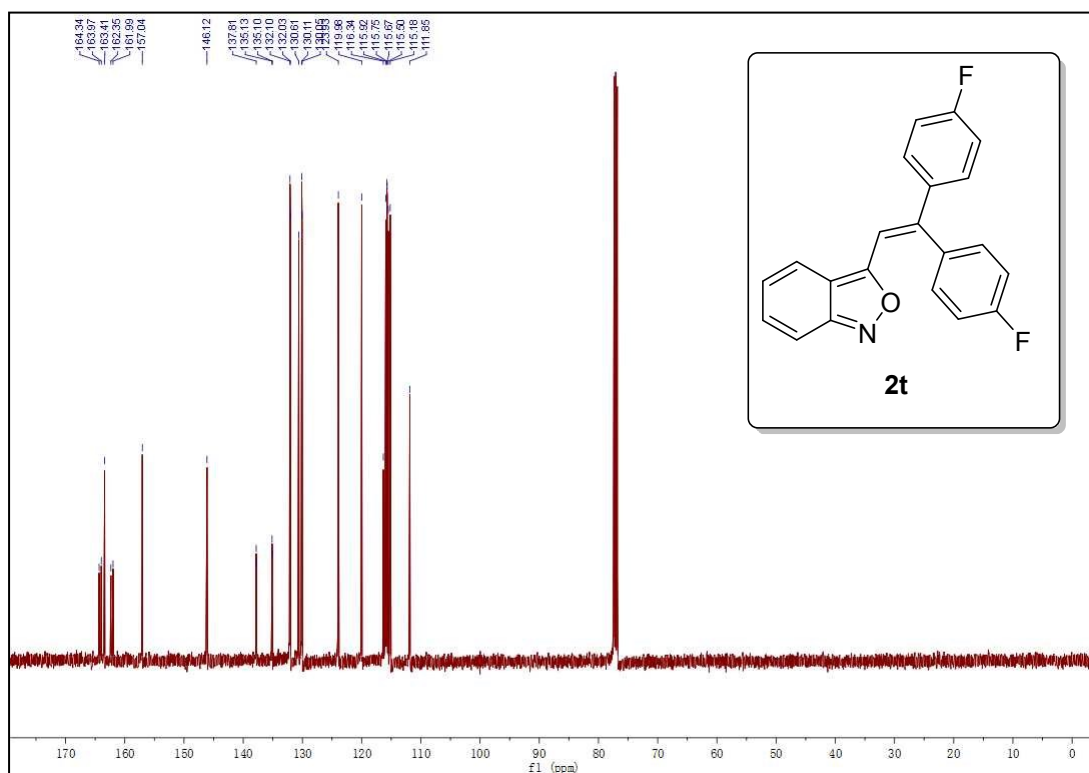

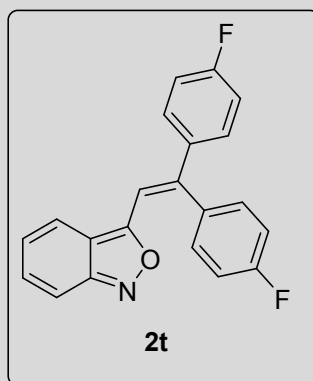

3-(2,2-bis(4-chlorophenyl)vinyl)benzo[c]isoxazole (2u)

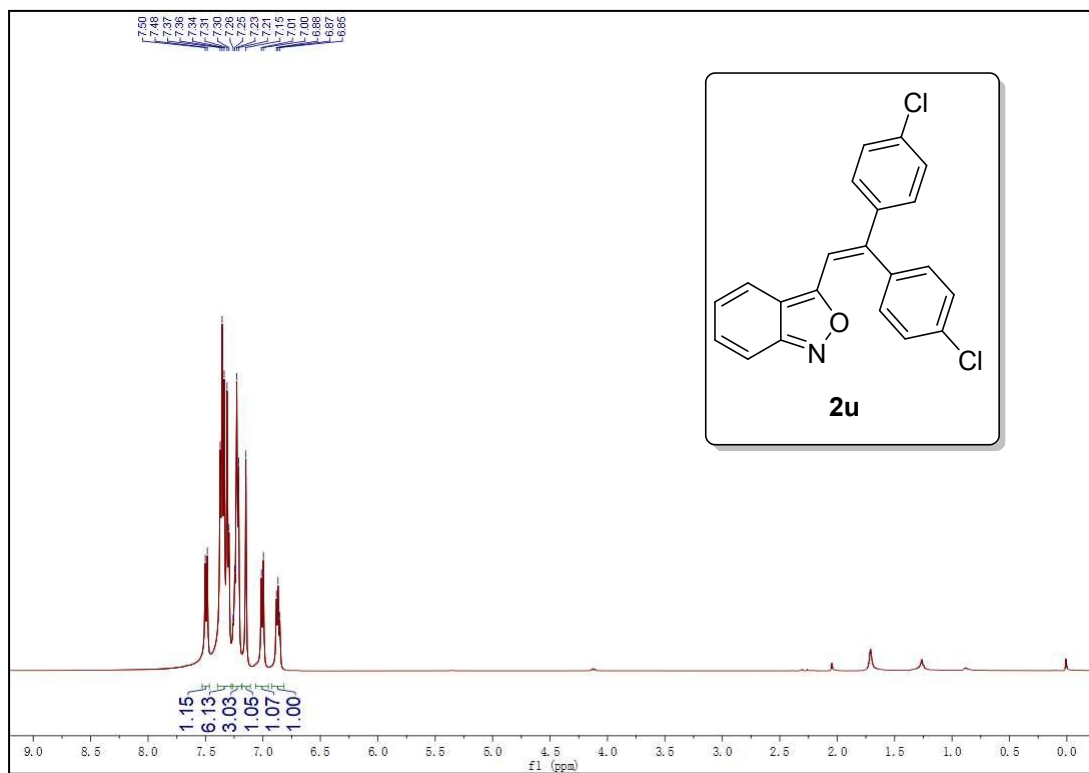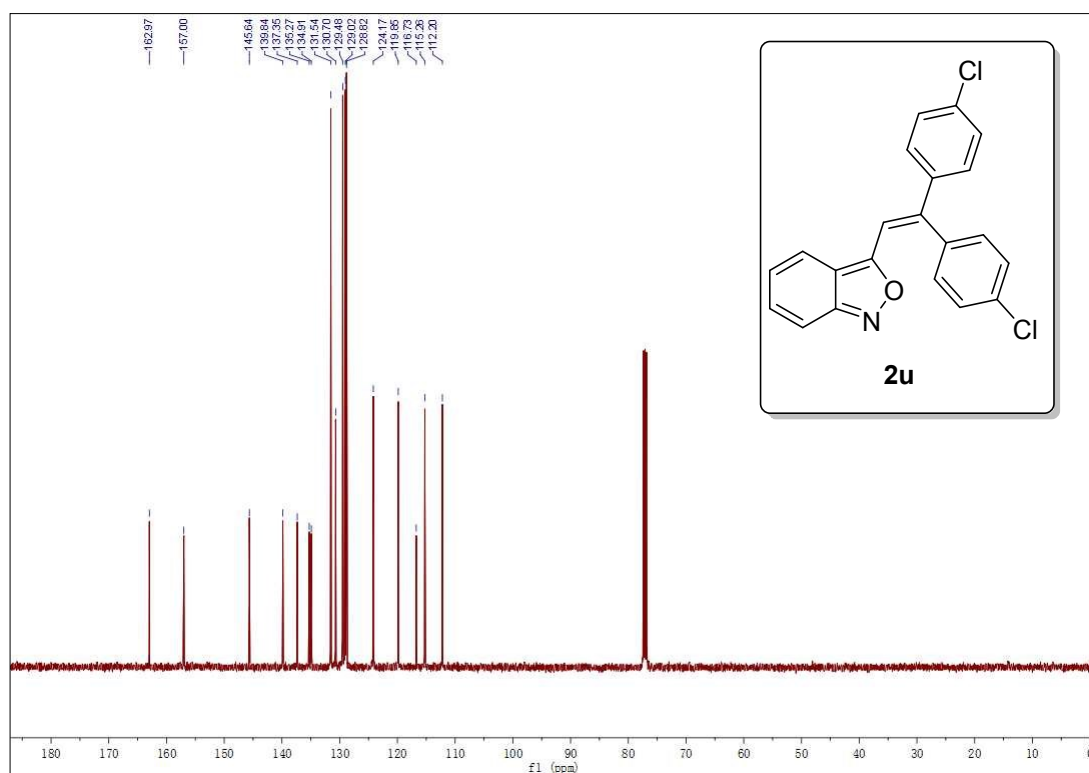



3-(2,2-bis(4-bromophenyl)vinyl)benzo[c]isoxazole(2v)

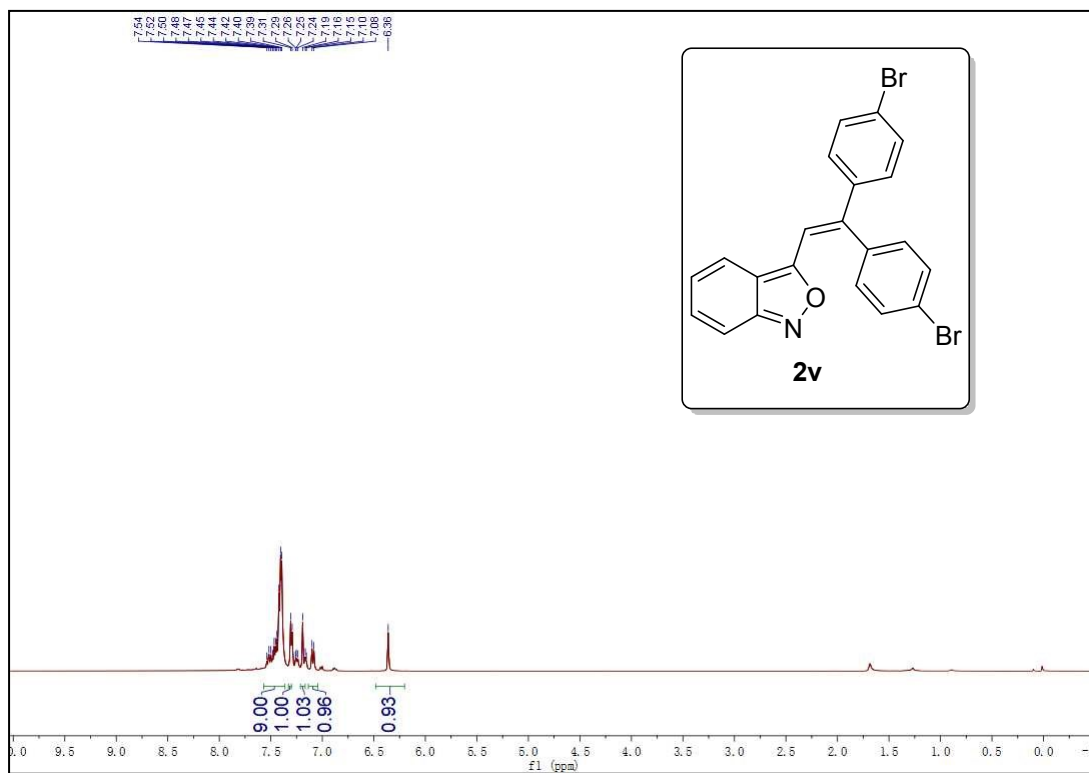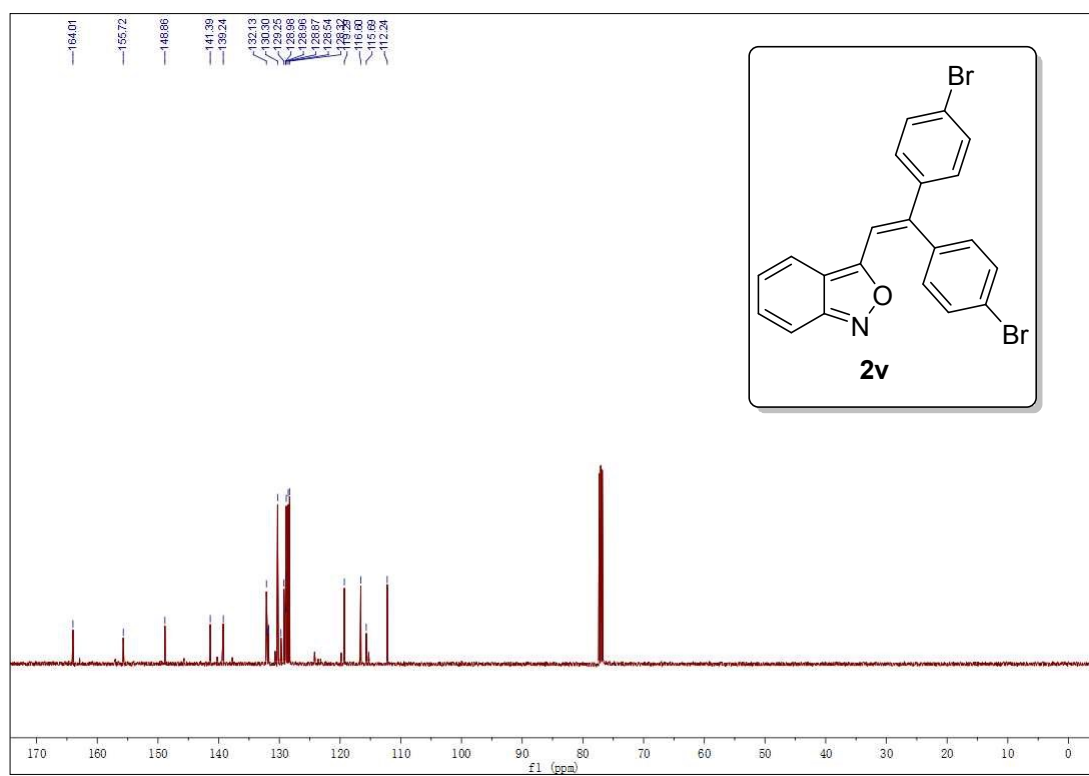

3-(2-phenyl-2-(p-tolyl)vinyl)benzo[c]isoxazole (2w)

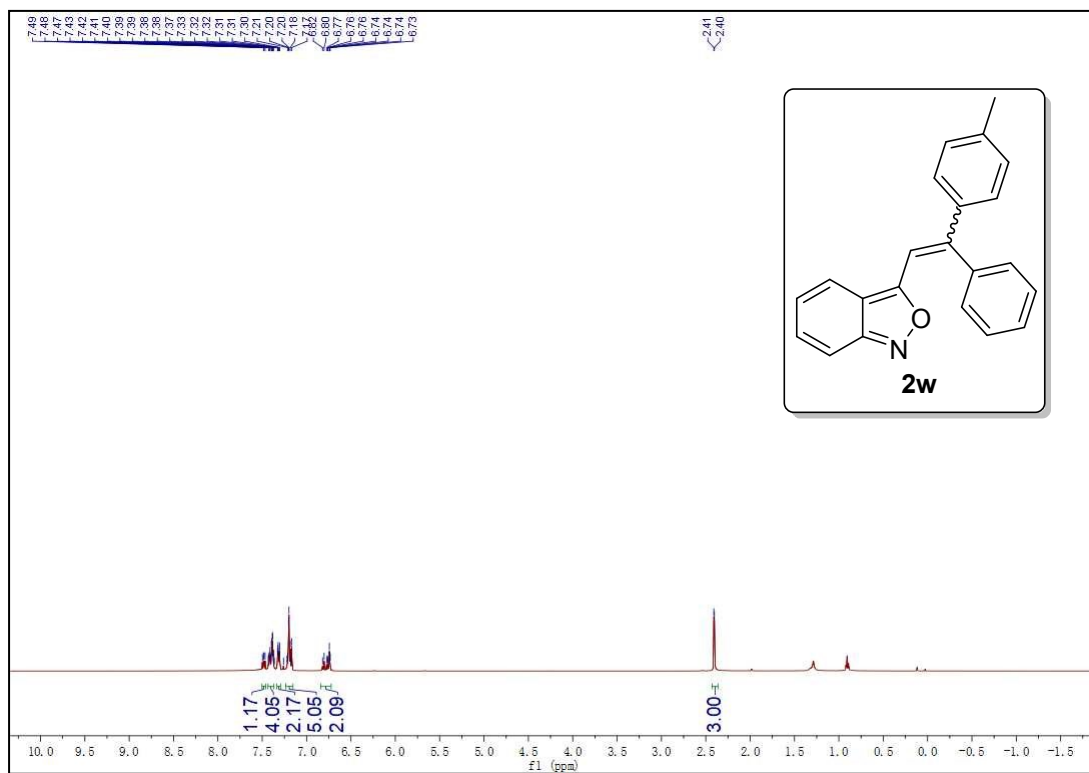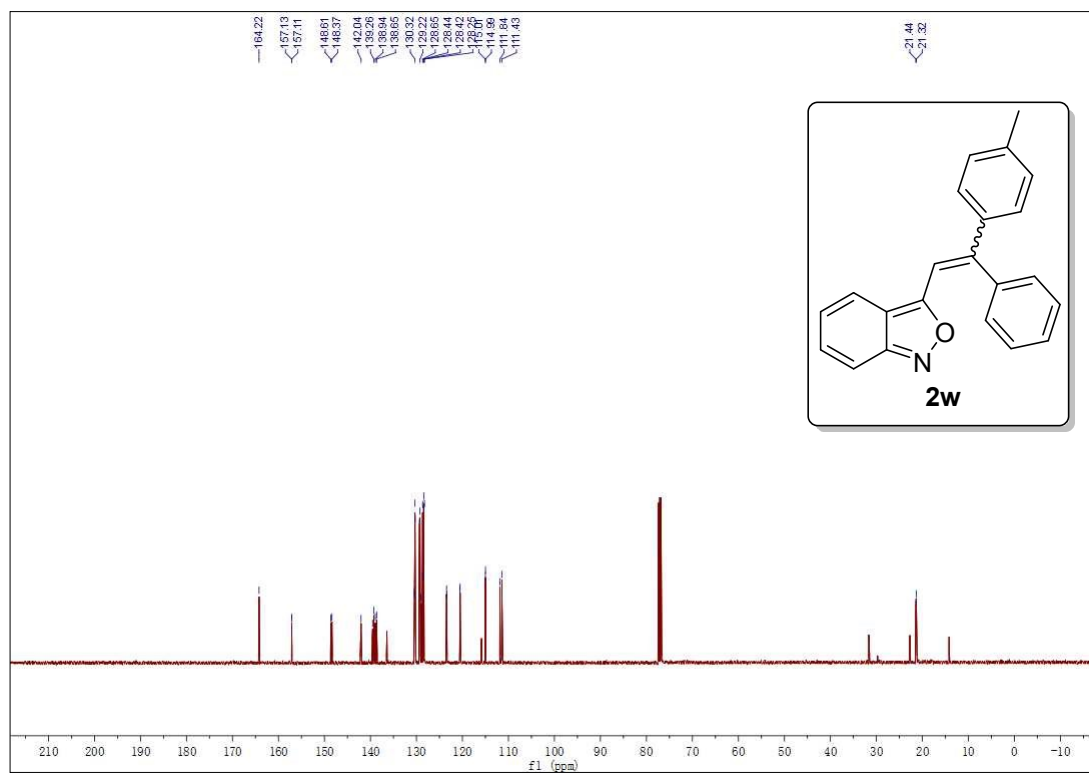

3-(2-(3,4-dimethylphenyl)-2-phenylvinyl)benzo[c]isoxazole (2x)

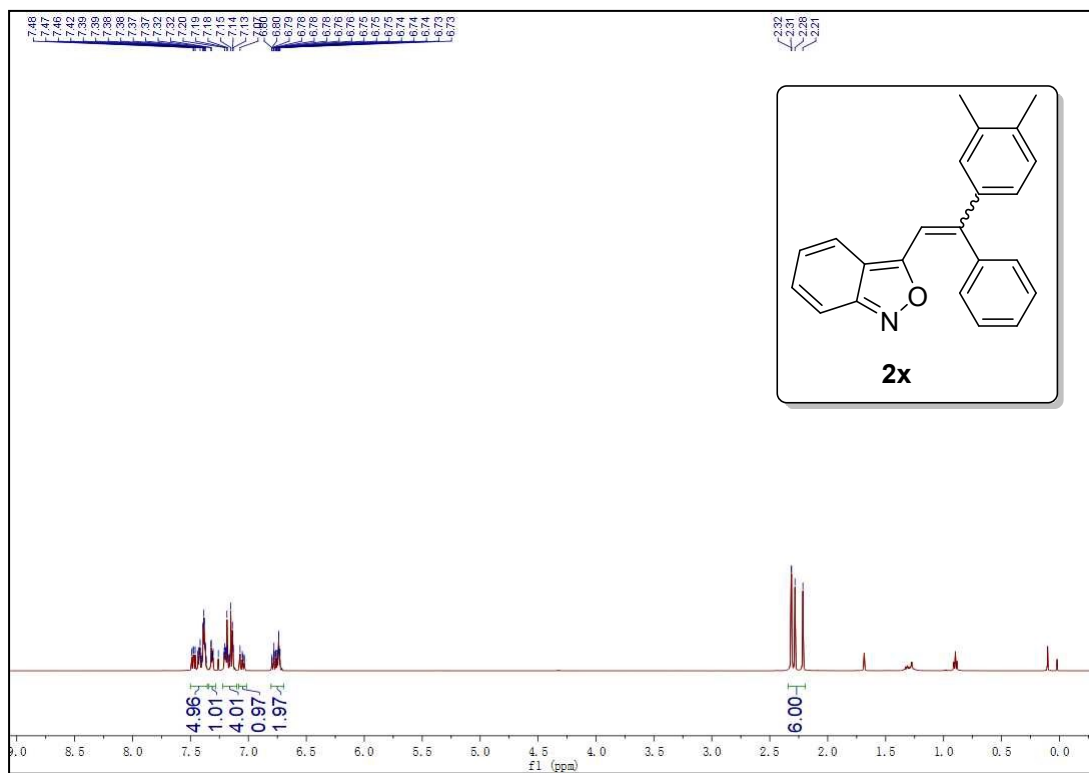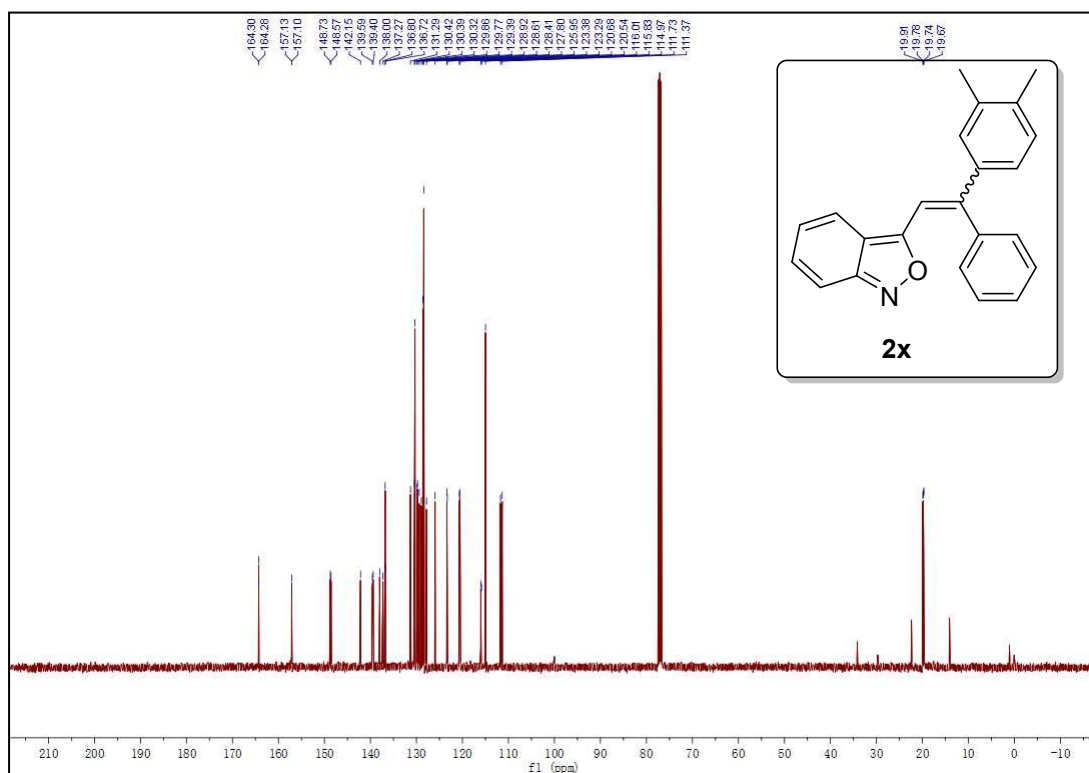

3-(2-(4-methoxyphenyl)-2-phenylvinyl)benzo[c]isoxazole (2y)

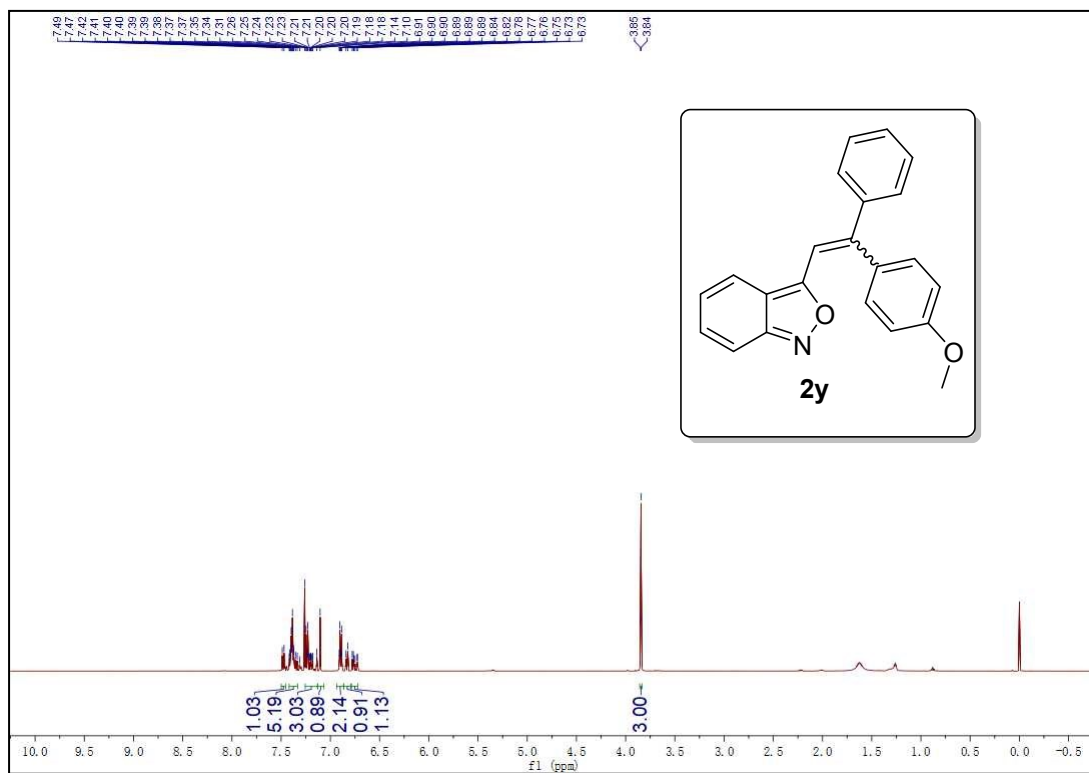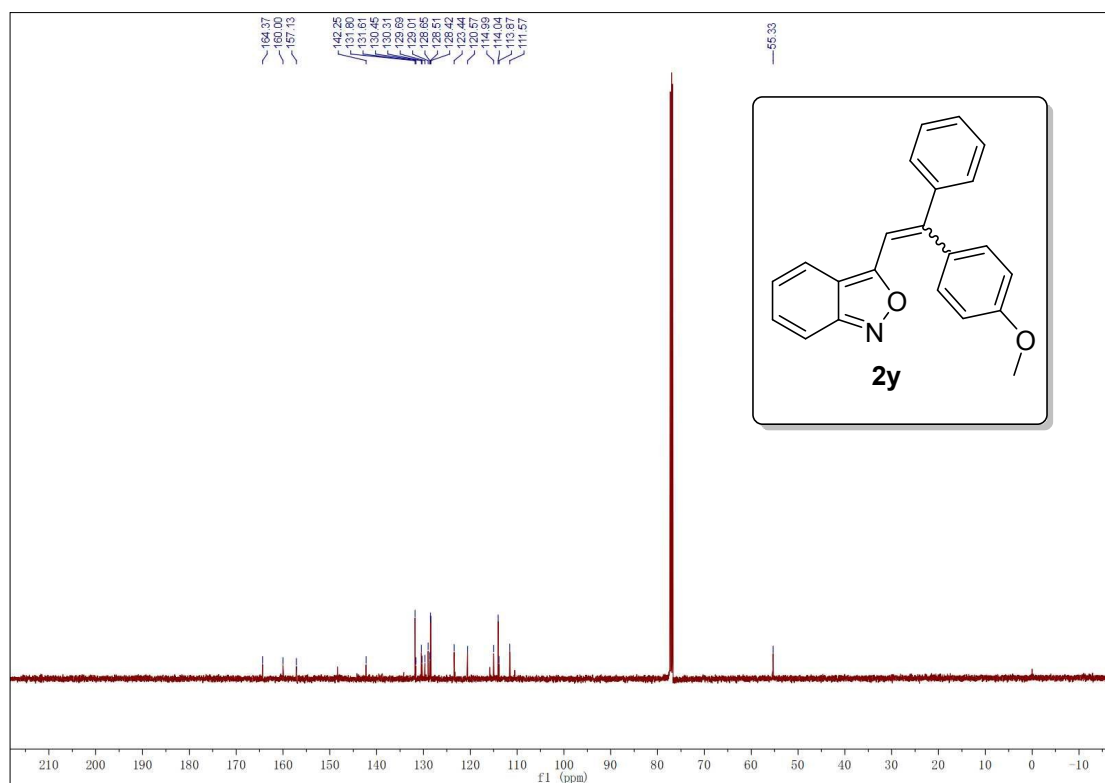

### 3-(2-(2-chlorophenyl)-2-(3-chlorophenyl)vinyl)benzo[c]isoxazole (2z)

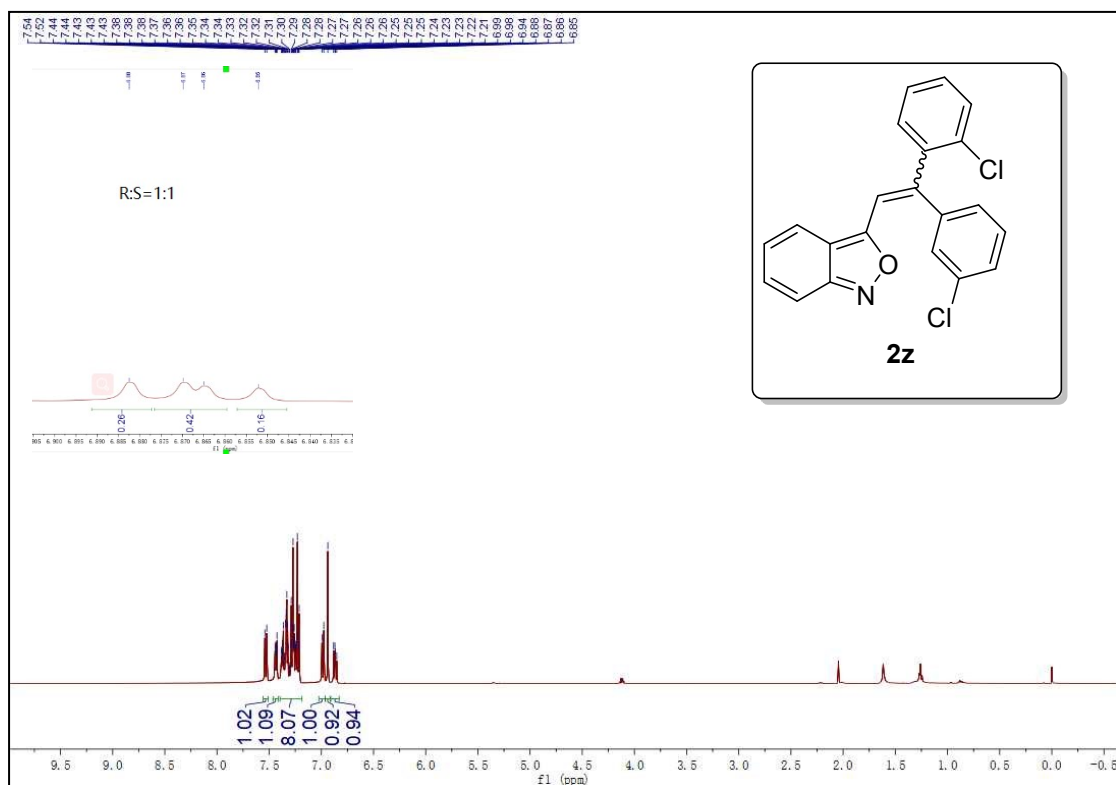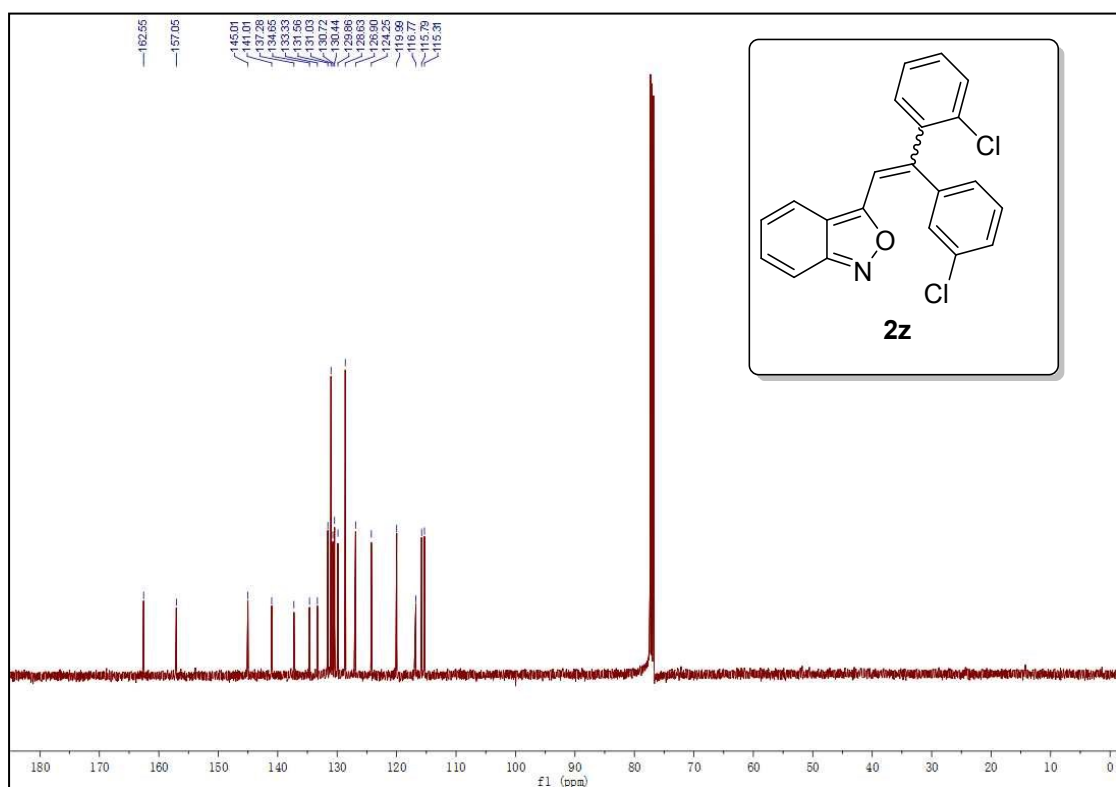

5-chloro-7-fluoro-3-(2-(4-fluorophenyl)-2-(4-methoxyphenyl)vinyl)benzo[c]isoxazole (2aa)

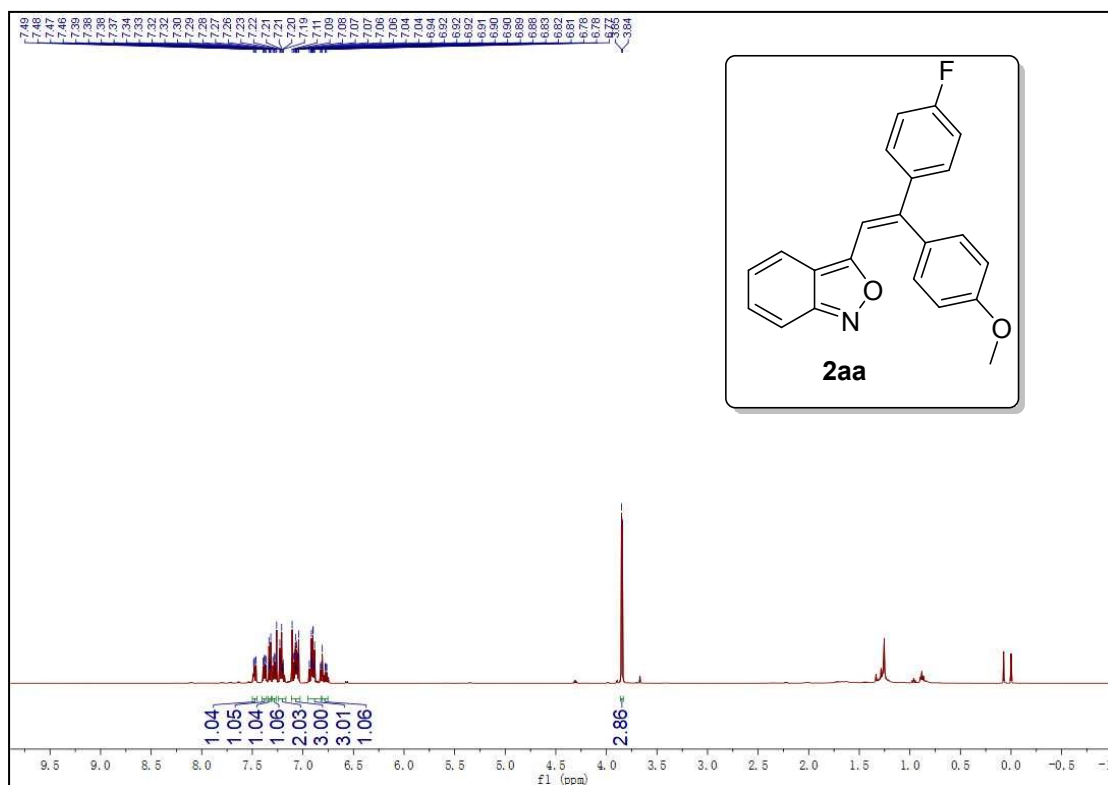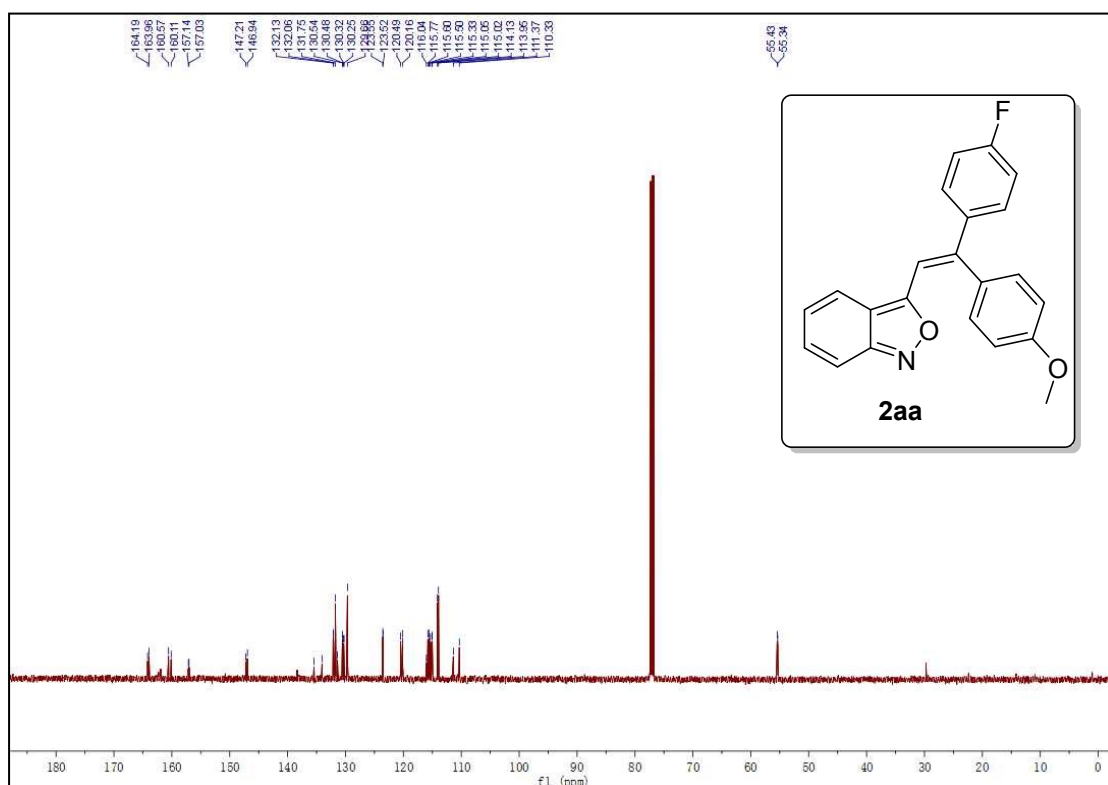

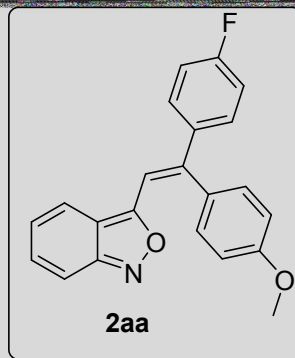

3-((9H-thioxanthen-9-ylidene)methyl)benzo[c]isoxazole (2ab)

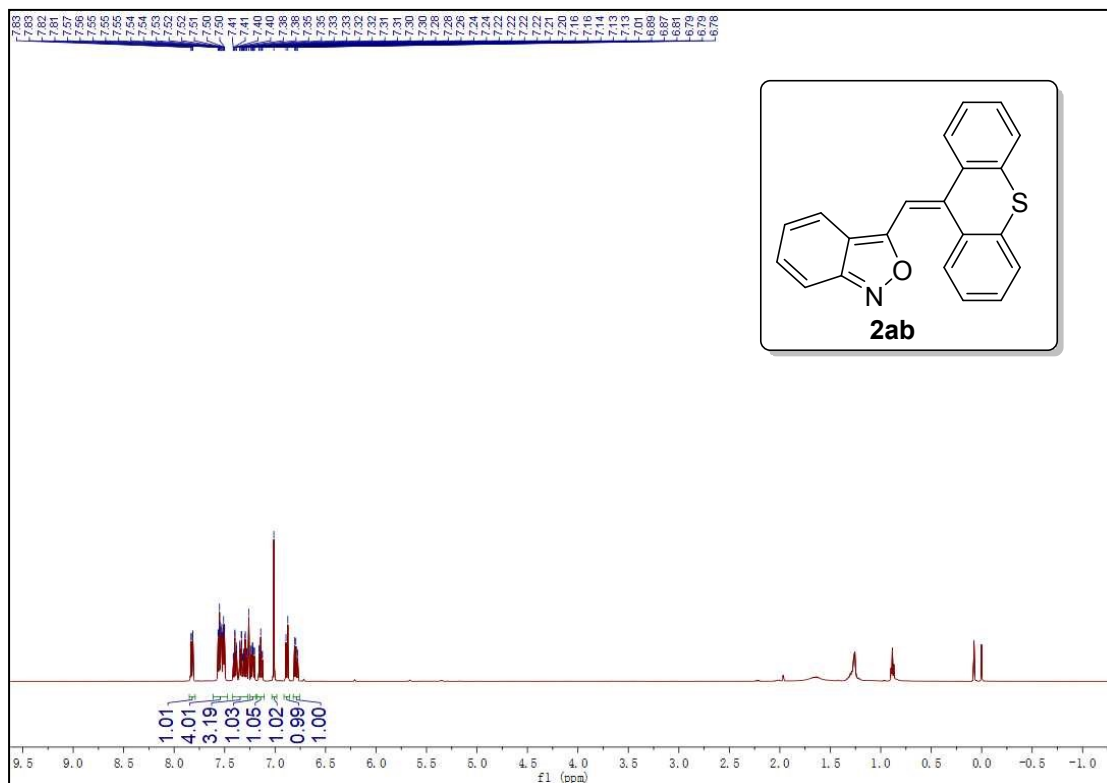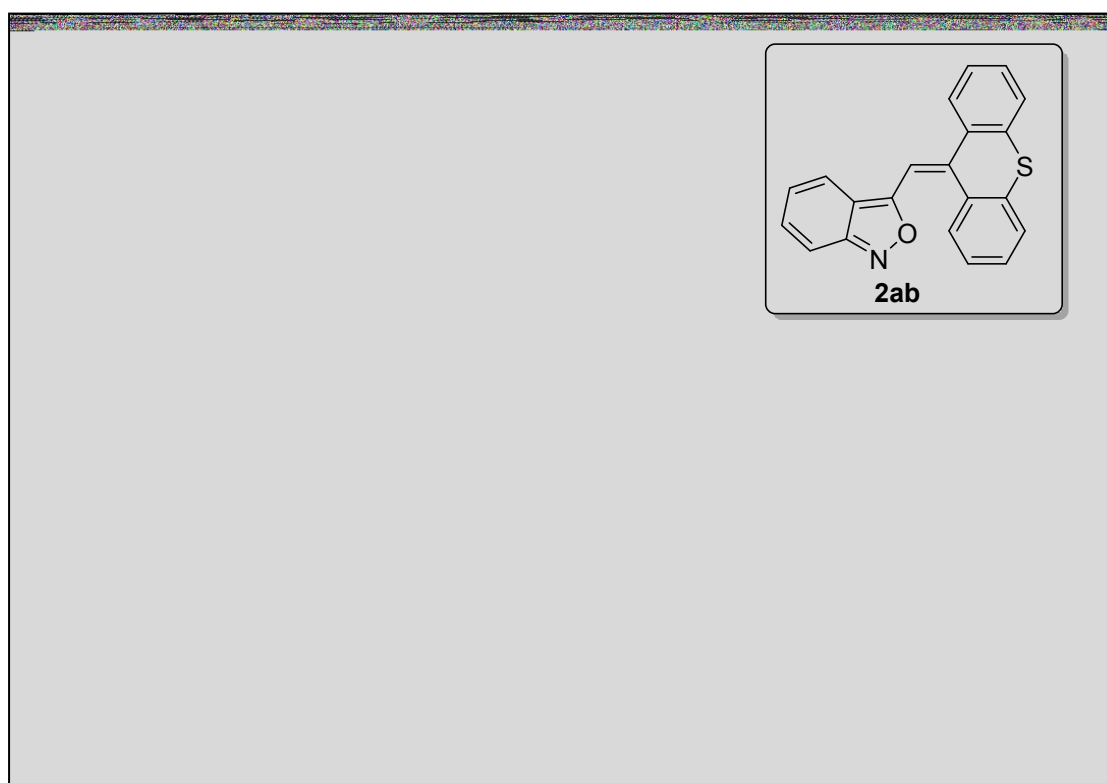



1-(2-aminophenyl)-3,3-diphenylprop-2-en-1-one (3a)

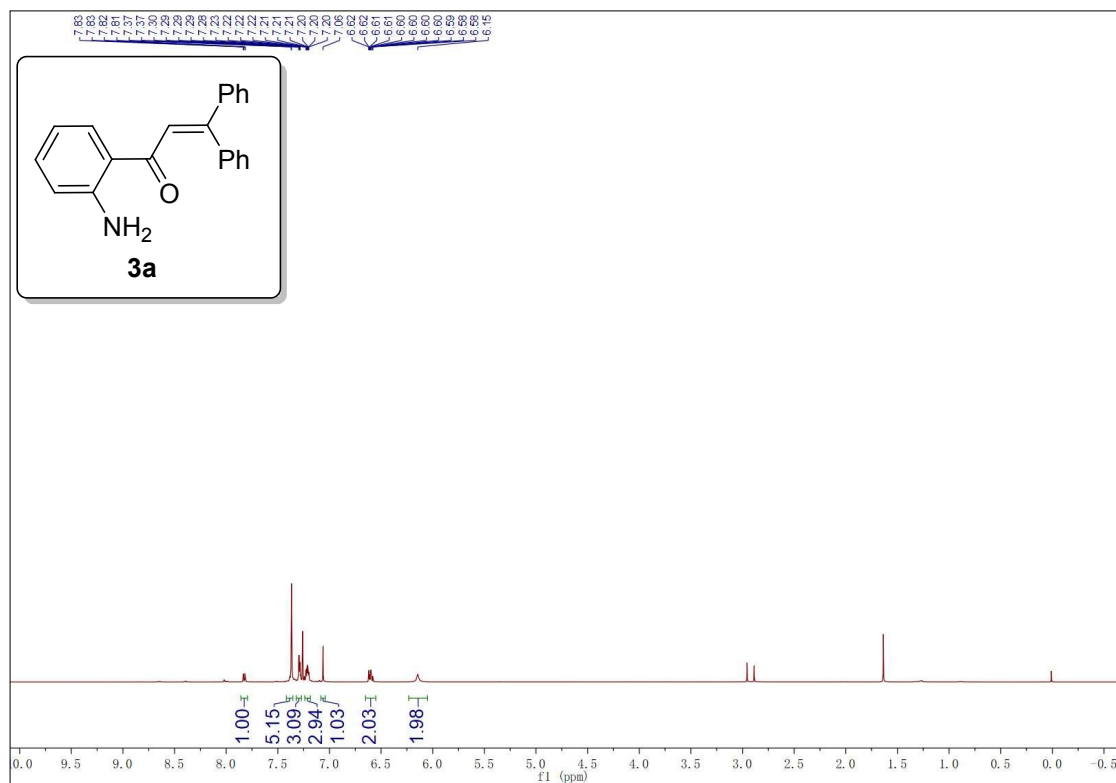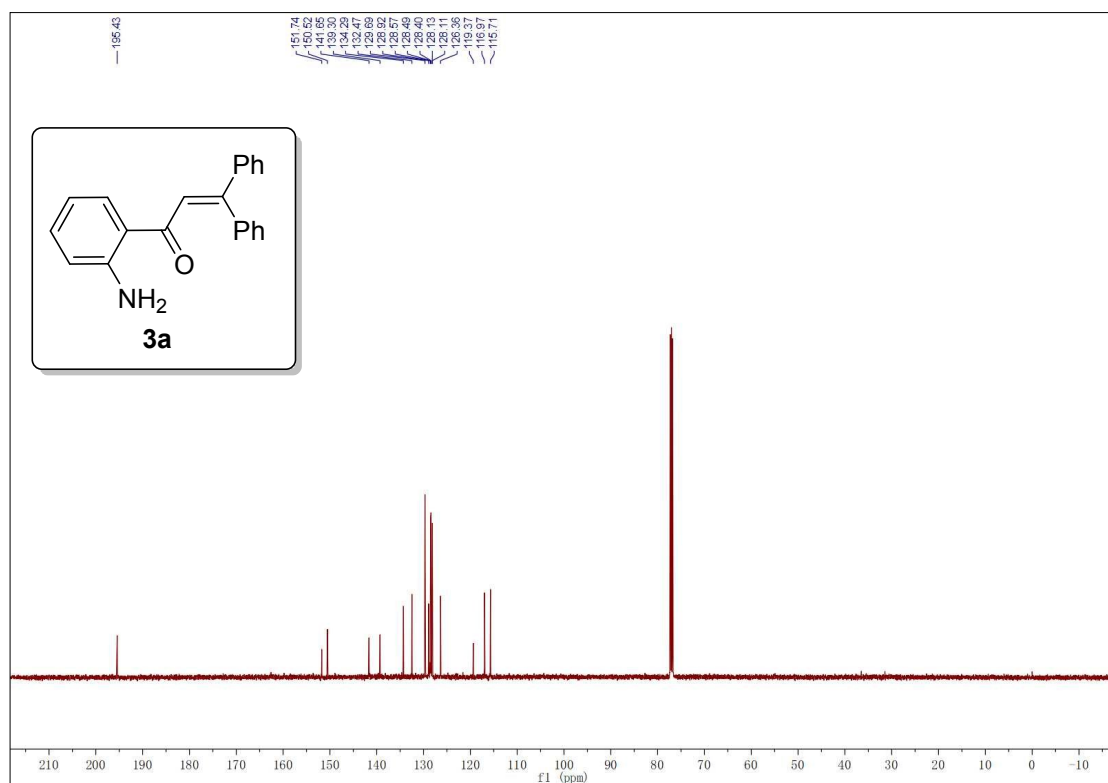

N-(2-(3,3-diphenylacryloyl)phenyl)-2-oxo-2-phenylacetamide (4a)

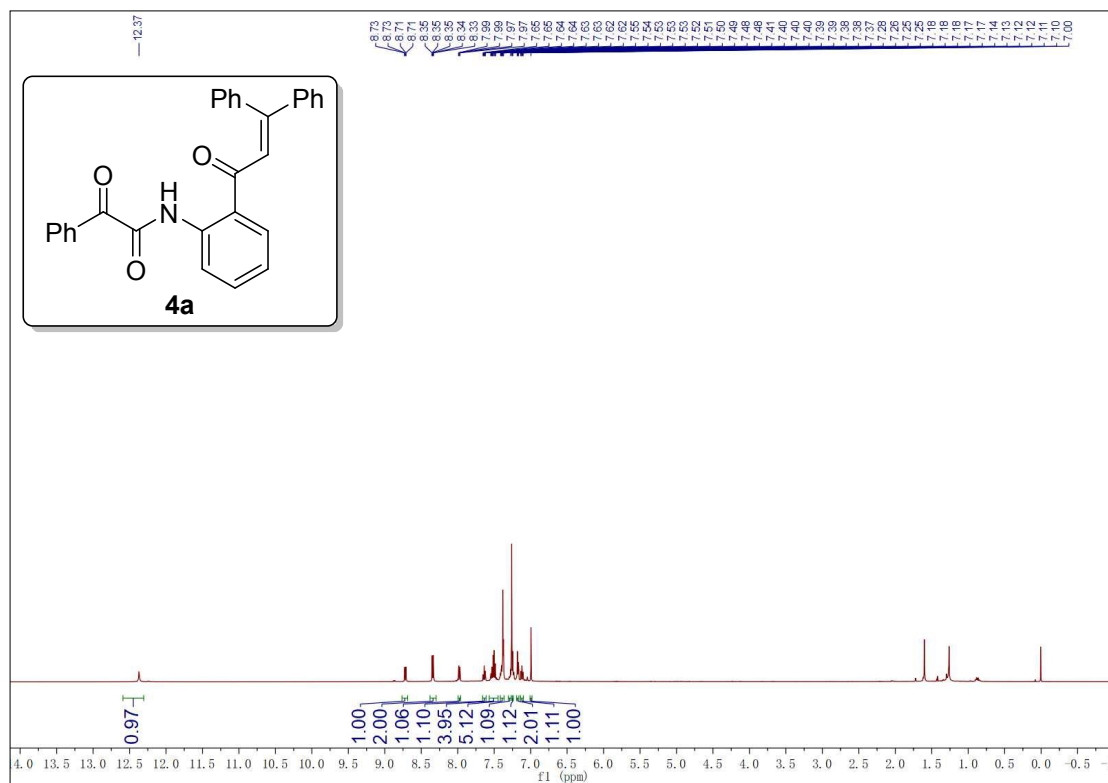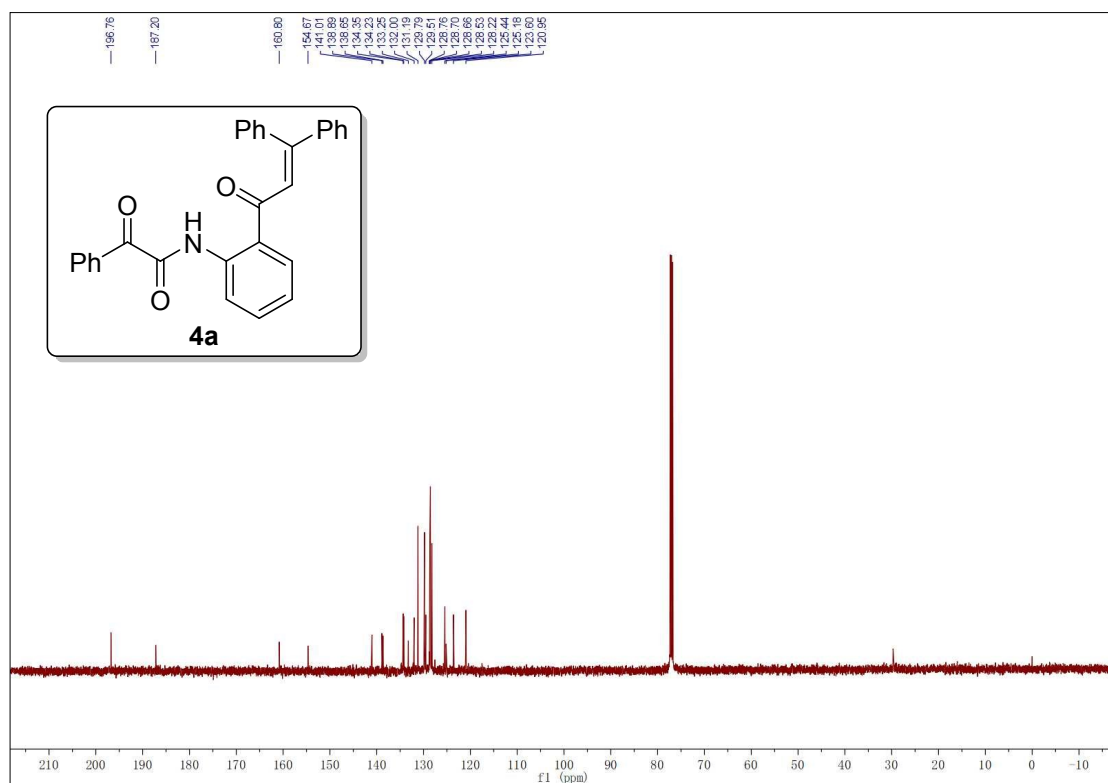

### N-(2-(3,3-diphenylacryloyl)phenyl)benzamide (5a)

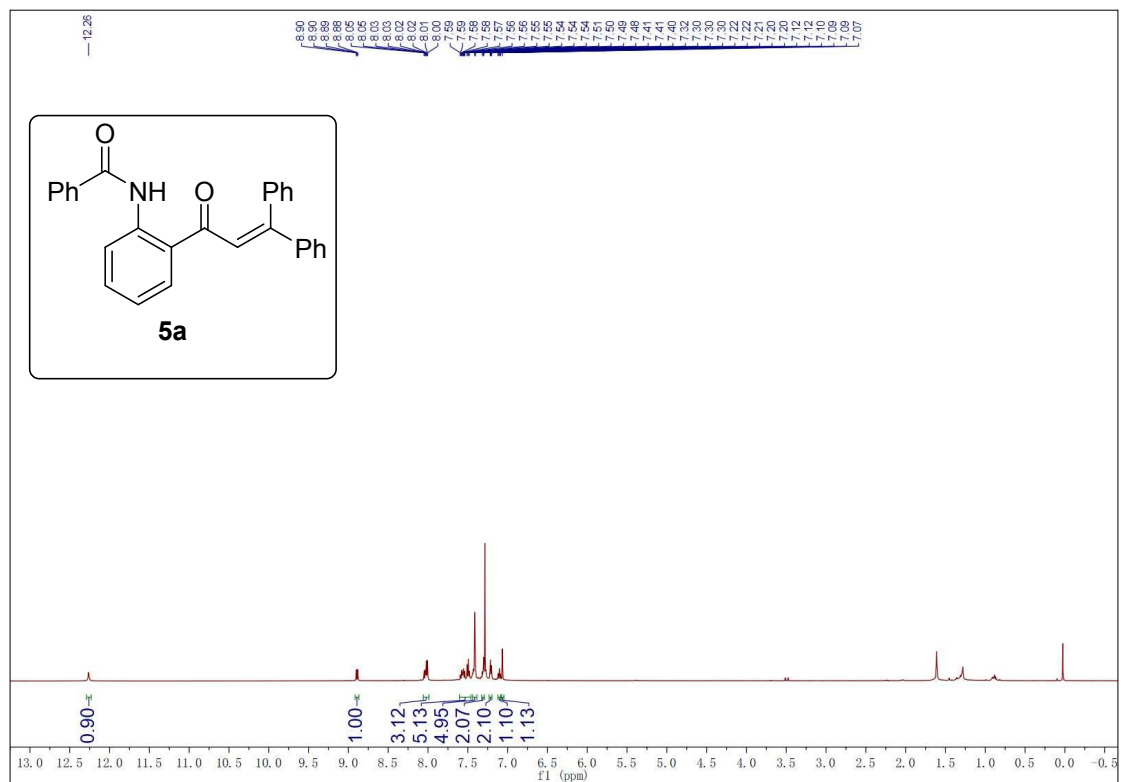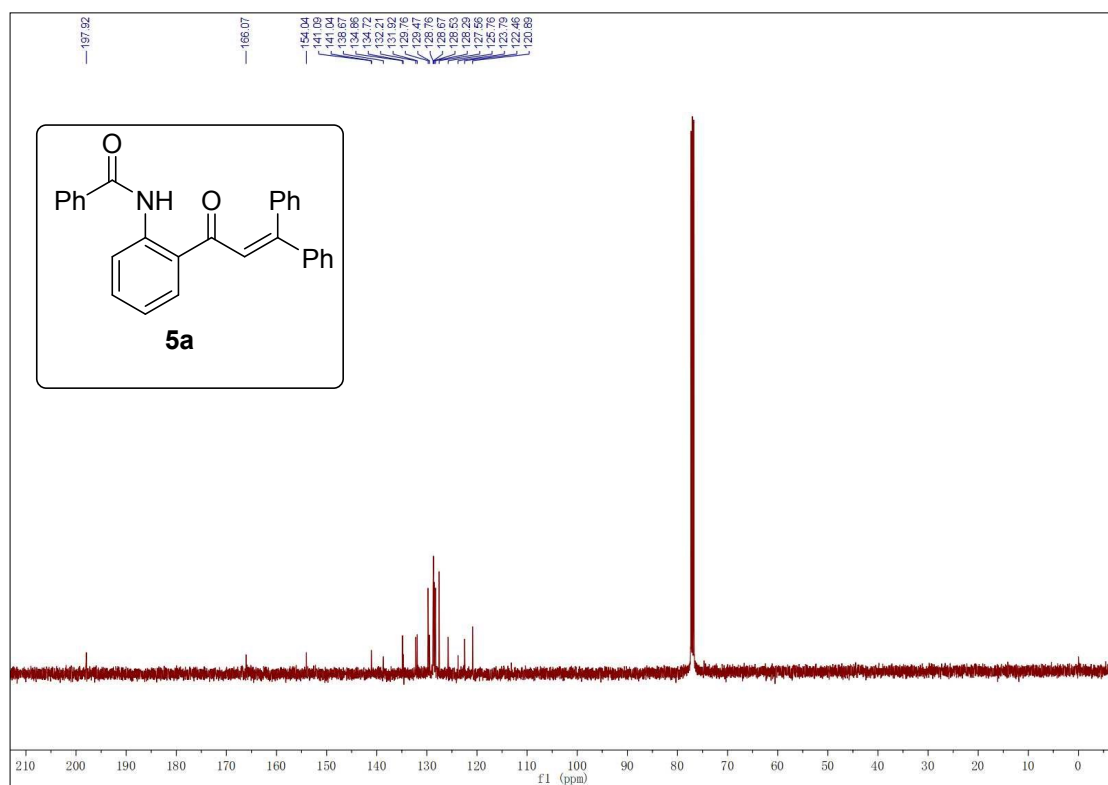

Supplement: d0cc07919g1.pdf [file d0cc07919g1.pdf]
